# Supplementary material for: Decomposition of Ethiopian life expectancy by age and cause of mortality; 1990-2015
Source: PLoS One. 2018 Oct 3;13(10):e0204395. doi: 10.1371/journal.pone.0204395 (PMC6169910; doi:10.1371/journal.pone.0204395)
Supplement: S1 Data — This file contains data from the Global Burden of Disease Study retrieved from the Institute of Health Metrics and Evaluation at http://ghdx.healthdata.org/gbd-results-tool. It has four different sheets; “data-PLOS”, “pivot”, “code” and survival”. data-PLOS: This sheet includes mortality data files of Ethiopia for the years 1990, 2000, 2010 and 2015 directly retrieved from the global burden of disease study; IHME website; Pivot: This sheet is a pivot format of the data-PLOS which helps for further categorization and ordering the causes of mortality based on their burden in terms of death, sex, year and age categories; Code: the code sheet is a direct download of the causes of death from IHME code book. It helps to identify each cause by level (Hierarchy I, Hierarchy II, and Hierarchy III);Survival: This sheet includes the final 20 causes of death (including others) that are selected for life expectancy decomposition by year ready to be exported to survival 6-software. (XLSX) [file pone.0204395.s001.xlsx]

## Sheet: data-PLOS
measure_id	measure_name	location_id	location_name	sex_id	sex_name	age_id	age_name	cause_id	cause_name	code	metric_id	metric_name	year	val	upper	lower
1	Deaths	179	Ethiopia	3	Both	6	5 to 9	491	Cardiovascular diseases	2	1	Number	2000	213.382	304.019	131.492
1	Deaths	179	Ethiopia	3	Both	7	10 to 14	491	Cardiovascular diseases	2	1	Number	2000	320.104	413.894	240.54
1	Deaths	179	Ethiopia	3	Both	8	15 to 19	491	Cardiovascular diseases	2	1	Number	2000	769.311	965.031	604.591
1	Deaths	179	Ethiopia	3	Both	9	20 to 24	491	Cardiovascular diseases	2	1	Number	2000	811.545	1038.59	631.026
1	Deaths	179	Ethiopia	3	Both	10	25 to 29	491	Cardiovascular diseases	2	1	Number	2000	844.28	1064.51	672.181
1	Deaths	179	Ethiopia	3	Both	11	30 to 34	491	Cardiovascular diseases	2	1	Number	2000	1236.81	1537.25	971.191
1	Deaths	179	Ethiopia	3	Both	12	35 to 39	491	Cardiovascular diseases	2	1	Number	2000	1744.73	2159.73	1375.65
1	Deaths	179	Ethiopia	3	Both	13	40 to 44	491	Cardiovascular diseases	2	1	Number	2000	3001.04	3677.07	2396.21
1	Deaths	179	Ethiopia	3	Both	14	45 to 49	491	Cardiovascular diseases	2	1	Number	2000	4338.14	5221.63	3536.68
1	Deaths	179	Ethiopia	3	Both	15	50 to 54	491	Cardiovascular diseases	2	1	Number	2000	6299.58	7575.56	5187.27
1	Deaths	179	Ethiopia	3	Both	16	55 to 59	491	Cardiovascular diseases	2	1	Number	2000	8264.87	9730.6	6949.97
1	Deaths	179	Ethiopia	3	Both	17	60 to 64	491	Cardiovascular diseases	2	1	Number	2000	10581	12272.4	8917.08
1	Deaths	179	Ethiopia	3	Both	18	65 to 69	491	Cardiovascular diseases	2	1	Number	2000	13955.8	15904.3	12025.2
1	Deaths	179	Ethiopia	3	Both	19	70 to 74	491	Cardiovascular diseases	2	1	Number	2000	14473.4	16363.8	12636.5
1	Deaths	179	Ethiopia	3	Both	20	75 to 79	491	Cardiovascular diseases	2	1	Number	2000	14549.2	16419	12723.7
1	Deaths	179	Ethiopia	3	Both	22	All Ages	491	Cardiovascular diseases	2	1	Number	2000	98374.1	108758	88865.4
1	Deaths	179	Ethiopia	3	Both	23	5-14 years	491	Cardiovascular diseases	2	1	Number	2000	533.486	682.019	387.092
1	Deaths	179	Ethiopia	3	Both	24	15-49 years	491	Cardiovascular diseases	2	1	Number	2000	12745.9	14572	10927.8
1	Deaths	179	Ethiopia	3	Both	25	50-69 years	491	Cardiovascular diseases	2	1	Number	2000	39101.2	44103	34491.6
1	Deaths	179	Ethiopia	3	Both	26	70+ years	491	Cardiovascular diseases	2	1	Number	2000	44980.6	49665	40647.8
1	Deaths	179	Ethiopia	3	Both	28	<1 year	491	Cardiovascular diseases	2	1	Number	2000	548.286	723.144	398.392
1	Deaths	179	Ethiopia	3	Both	30	80 to 84	491	Cardiovascular diseases	2	1	Number	2000	10250.6	11525	9039.46
1	Deaths	179	Ethiopia	3	Both	31	85 to 89	491	Cardiovascular diseases	2	1	Number	2000	4278.29	4826.59	3729.51
1	Deaths	179	Ethiopia	3	Both	32	90 to 94	491	Cardiovascular diseases	2	1	Number	2000	1187.46	1345.63	1028.07
1	Deaths	179	Ethiopia	3	Both	158	<20 years	491	Cardiovascular diseases	2	1	Number	2000	2315.76	2808.18	1847.29
1	Deaths	179	Ethiopia	3	Both	159	10 to 24	491	Cardiovascular diseases	2	1	Number	2000	1900.96	2260.11	1591.86
1	Deaths	179	Ethiopia	3	Both	169	10 to 54	491	Cardiovascular diseases	2	1	Number	2000	19365.5	22051.8	16819.3
1	Deaths	179	Ethiopia	3	Both	235	95 plus	491	Cardiovascular diseases	2	1	Number	2000	241.629	283.959	201.576
1	Deaths	179	Ethiopia	3	Both	1	Under 5	492	Rheumatic heart disease	3	1	Number	2000	60.4459	111.161	28.4399
1	Deaths	179	Ethiopia	3	Both	5	1 to 4	492	Rheumatic heart disease	3	1	Number	2000	60.4459	111.161	28.4399
1	Deaths	179	Ethiopia	3	Both	6	5 to 9	492	Rheumatic heart disease	3	1	Number	2000	36.7515	60.1088	19.7044
1	Deaths	179	Ethiopia	3	Both	7	10 to 14	492	Rheumatic heart disease	3	1	Number	2000	76.2022	116.206	48.2867
1	Deaths	179	Ethiopia	3	Both	8	15 to 19	492	Rheumatic heart disease	3	1	Number	2000	69.5755	107.762	44.0894
1	Deaths	179	Ethiopia	3	Both	9	20 to 24	492	Rheumatic heart disease	3	1	Number	2000	64.7266	105.705	40.2629
1	Deaths	179	Ethiopia	3	Both	10	25 to 29	492	Rheumatic heart disease	3	1	Number	2000	50.7803	104.419	28.727
1	Deaths	179	Ethiopia	3	Both	11	30 to 34	492	Rheumatic heart disease	3	1	Number	2000	58.9955	124.633	32.6525
1	Deaths	179	Ethiopia	3	Both	12	35 to 39	492	Rheumatic heart disease	3	1	Number	2000	82.1229	163.811	46.2693
1	Deaths	179	Ethiopia	3	Both	13	40 to 44	492	Rheumatic heart disease	3	1	Number	2000	121.541	249.567	67.3342
1	Deaths	179	Ethiopia	3	Both	14	45 to 49	492	Rheumatic heart disease	3	1	Number	2000	144.306	290.69	81.7136
1	Deaths	179	Ethiopia	3	Both	15	50 to 54	492	Rheumatic heart disease	3	1	Number	2000	203.415	419.55	114.491
1	Deaths	179	Ethiopia	3	Both	16	55 to 59	492	Rheumatic heart disease	3	1	Number	2000	252.608	494.555	146.36
1	Deaths	179	Ethiopia	3	Both	17	60 to 64	492	Rheumatic heart disease	3	1	Number	2000	274.922	555.729	158.882
1	Deaths	179	Ethiopia	3	Both	18	65 to 69	492	Rheumatic heart disease	3	1	Number	2000	300.881	559.314	182.72
1	Deaths	179	Ethiopia	3	Both	19	70 to 74	492	Rheumatic heart disease	3	1	Number	2000	241.919	451.023	142.405
1	Deaths	179	Ethiopia	3	Both	20	75 to 79	492	Rheumatic heart disease	3	1	Number	2000	193.213	341.406	117.292
1	Deaths	179	Ethiopia	3	Both	22	All Ages	492	Rheumatic heart disease	3	1	Number	2000	2379.55	4152.52	1634.03
1	Deaths	179	Ethiopia	3	Both	23	5-14 years	492	Rheumatic heart disease	3	1	Number	2000	112.954	169.597	72.2678
1	Deaths	179	Ethiopia	3	Both	24	15-49 years	492	Rheumatic heart disease	3	1	Number	2000	592.048	1061.31	393.858
1	Deaths	179	Ethiopia	3	Both	25	50-69 years	492	Rheumatic heart disease	3	1	Number	2000	1031.83	1960.61	668.525
1	Deaths	179	Ethiopia	3	Both	26	70+ years	492	Rheumatic heart disease	3	1	Number	2000	582.279	992.937	383.759
1	Deaths	179	Ethiopia	3	Both	30	80 to 84	492	Rheumatic heart disease	3	1	Number	2000	102.425	169.889	66.4556
1	Deaths	179	Ethiopia	3	Both	31	85 to 89	492	Rheumatic heart disease	3	1	Number	2000	35.5794	58.3581	22.2422
1	Deaths	179	Ethiopia	3	Both	32	90 to 94	492	Rheumatic heart disease	3	1	Number	2000	7.8429	12.9973	4.8892
1	Deaths	179	Ethiopia	3	Both	158	<20 years	492	Rheumatic heart disease	3	1	Number	2000	242.975	361.142	162.646
1	Deaths	179	Ethiopia	3	Both	159	10 to 24	492	Rheumatic heart disease	3	1	Number	2000	210.504	303.895	145.526
1	Deaths	179	Ethiopia	3	Both	169	10 to 54	492	Rheumatic heart disease	3	1	Number	2000	871.666	1557.51	590.837
1	Deaths	179	Ethiopia	3	Both	235	95 plus	492	Rheumatic heart disease	3	1	Number	2000	1.29979	2.31105	0.761731
1	Deaths	179	Ethiopia	3	Both	1	Under 5	493	Ischemic heart disease	3	1	Number	2000	14.6165	26.8561	7.02091
1	Deaths	179	Ethiopia	3	Both	4	Post Neonatal	493	Ischemic heart disease	3	1	Number	2000	3.35398	6.19219	1.54083
1	Deaths	179	Ethiopia	3	Both	5	1 to 4	493	Ischemic heart disease	3	1	Number	2000	11.2625	23.2865	4.45622
1	Deaths	179	Ethiopia	3	Both	6	5 to 9	493	Ischemic heart disease	3	1	Number	2000	15.7895	28.288	7.77162
1	Deaths	179	Ethiopia	3	Both	7	10 to 14	493	Ischemic heart disease	3	1	Number	2000	20.7897	37.0025	10.5015
1	Deaths	179	Ethiopia	3	Both	8	15 to 19	493	Ischemic heart disease	3	1	Number	2000	245.781	337.058	174.361
1	Deaths	179	Ethiopia	3	Both	9	20 to 24	493	Ischemic heart disease	3	1	Number	2000	220.483	297.066	152.493
1	Deaths	179	Ethiopia	3	Both	10	25 to 29	493	Ischemic heart disease	3	1	Number	2000	304.57	415.55	223.889
1	Deaths	179	Ethiopia	3	Both	11	30 to 34	493	Ischemic heart disease	3	1	Number	2000	427.557	561.506	320.09
1	Deaths	179	Ethiopia	3	Both	12	35 to 39	493	Ischemic heart disease	3	1	Number	2000	709.785	929.148	528.262
1	Deaths	179	Ethiopia	3	Both	13	40 to 44	493	Ischemic heart disease	3	1	Number	2000	1154.87	1497.44	870.638
1	Deaths	179	Ethiopia	3	Both	14	45 to 49	493	Ischemic heart disease	3	1	Number	2000	1857.78	2346.33	1439.18
1	Deaths	179	Ethiopia	3	Both	15	50 to 54	493	Ischemic heart disease	3	1	Number	2000	2470.95	3078.92	1940.05
1	Deaths	179	Ethiopia	3	Both	16	55 to 59	493	Ischemic heart disease	3	1	Number	2000	3416.63	4193.4	2733.1
1	Deaths	179	Ethiopia	3	Both	17	60 to 64	493	Ischemic heart disease	3	1	Number	2000	4010.38	4872.5	3273.78
1	Deaths	179	Ethiopia	3	Both	18	65 to 69	493	Ischemic heart disease	3	1	Number	2000	5698.87	6863.53	4684.71
1	Deaths	179	Ethiopia	3	Both	19	70 to 74	493	Ischemic heart disease	3	1	Number	2000	5710.23	6853.87	4718.2
1	Deaths	179	Ethiopia	3	Both	20	75 to 79	493	Ischemic heart disease	3	1	Number	2000	5958.54	7119.1	4963.36
1	Deaths	179	Ethiopia	3	Both	22	All Ages	493	Ischemic heart disease	3	1	Number	2000	38718.7	43696.7	34380.9
1	Deaths	179	Ethiopia	3	Both	23	5-14 years	493	Ischemic heart disease	3	1	Number	2000	36.5793	57.0232	21.6735
1	Deaths	179	Ethiopia	3	Both	24	15-49 years	493	Ischemic heart disease	3	1	Number	2000	4920.83	5852.22	4110.84
1	Deaths	179	Ethiopia	3	Both	25	50-69 years	493	Ischemic heart disease	3	1	Number	2000	15596.8	18030	13511.5
1	Deaths	179	Ethiopia	3	Both	26	70+ years	493	Ischemic heart disease	3	1	Number	2000	18149.8	20710.1	15894.6
1	Deaths	179	Ethiopia	3	Both	28	<1 year	493	Ischemic heart disease	3	1	Number	2000	3.35398	6.19219	1.54083
1	Deaths	179	Ethiopia	3	Both	30	80 to 84	493	Ischemic heart disease	3	1	Number	2000	4027.71	4842.81	3308.27
1	Deaths	179	Ethiopia	3	Both	31	85 to 89	493	Ischemic heart disease	3	1	Number	2000	1833.71	2210.17	1536.81
1	Deaths	179	Ethiopia	3	Both	32	90 to 94	493	Ischemic heart disease	3	1	Number	2000	507.267	616.478	411.37
1	Deaths	179	Ethiopia	3	Both	158	<20 years	493	Ischemic heart disease	3	1	Number	2000	296.977	394.939	217.592
1	Deaths	179	Ethiopia	3	Both	159	10 to 24	493	Ischemic heart disease	3	1	Number	2000	487.054	617.128	373.587
1	Deaths	179	Ethiopia	3	Both	169	10 to 54	493	Ischemic heart disease	3	1	Number	2000	7412.57	8771.05	6274.95
1	Deaths	179	Ethiopia	3	Both	235	95 plus	493	Ischemic heart disease	3	1	Number	2000	112.376	139.439	89.0996
1	Deaths	179	Ethiopia	3	Both	1	Under 5	494	Stroke	3	1	Number	2000	203.204	310.048	122.836
1	Deaths	179	Ethiopia	3	Both	2	Early Neonatal	494	Stroke	3	1	Number	2000	17.2376	26.9794	9.73312
1	Deaths	179	Ethiopia	3	Both	3	Late Neonatal	494	Stroke	3	1	Number	2000	12.708	22.5483	5.83104
1	Deaths	179	Ethiopia	3	Both	4	Post Neonatal	494	Stroke	3	1	Number	2000	59.888	102.008	30.4287
1	Deaths	179	Ethiopia	3	Both	5	1 to 4	494	Stroke	3	1	Number	2000	113.37	192.774	58.3672
1	Deaths	179	Ethiopia	3	Both	6	5 to 9	494	Stroke	3	1	Number	2000	59.2907	94.7669	32.5829
1	Deaths	179	Ethiopia	3	Both	7	10 to 14	494	Stroke	3	1	Number	2000	90.6751	130.112	58.8947
1	Deaths	179	Ethiopia	3	Both	8	15 to 19	494	Stroke	3	1	Number	2000	243.497	323.649	172.524
1	Deaths	179	Ethiopia	3	Both	9	20 to 24	494	Stroke	3	1	Number	2000	291.903	386.674	209.629
1	Deaths	179	Ethiopia	3	Both	10	25 to 29	494	Stroke	3	1	Number	2000	209.888	284.548	150.537
1	Deaths	179	Ethiopia	3	Both	11	30 to 34	494	Stroke	3	1	Number	2000	410.511	550.938	299.902
1	Deaths	179	Ethiopia	3	Both	12	35 to 39	494	Stroke	3	1	Number	2000	491.499	658.67	356.797
1	Deaths	179	Ethiopia	3	Both	13	40 to 44	494	Stroke	3	1	Number	2000	1043.15	1356.78	791.311
1	Deaths	179	Ethiopia	3	Both	14	45 to 49	494	Stroke	3	1	Number	2000	1488.65	1915.39	1121.14
1	Deaths	179	Ethiopia	3	Both	15	50 to 54	494	Stroke	3	1	Number	2000	2389.83	3012.27	1849.79
1	Deaths	179	Ethiopia	3	Both	16	55 to 59	494	Stroke	3	1	Number	2000	2935.78	3707.65	2285.98
1	Deaths	179	Ethiopia	3	Both	17	60 to 64	494	Stroke	3	1	Number	2000	4235.42	5216.13	3317.19
1	Deaths	179	Ethiopia	3	Both	18	65 to 69	494	Stroke	3	1	Number	2000	5258.39	6508.46	4158.99
1	Deaths	179	Ethiopia	3	Both	19	70 to 74	494	Stroke	3	1	Number	2000	5815.61	7095.57	4705.64
1	Deaths	179	Ethiopia	3	Both	20	75 to 79	494	Stroke	3	1	Number	2000	5283.99	6517.73	4263.06
1	Deaths	179	Ethiopia	3	Both	22	All Ages	494	Stroke	3	1	Number	2000	35594.3	41022.2	30865
1	Deaths	179	Ethiopia	3	Both	23	5-14 years	494	Stroke	3	1	Number	2000	149.966	212.728	97.8797
1	Deaths	179	Ethiopia	3	Both	24	15-49 years	494	Stroke	3	1	Number	2000	4179.1	5061.05	3463.69
1	Deaths	179	Ethiopia	3	Both	25	50-69 years	494	Stroke	3	1	Number	2000	14819.4	17477.9	12602.9
1	Deaths	179	Ethiopia	3	Both	26	70+ years	494	Stroke	3	1	Number	2000	16242.6	18904	13778.9
1	Deaths	179	Ethiopia	3	Both	28	<1 year	494	Stroke	3	1	Number	2000	89.8335	137.004	54.7541
1	Deaths	179	Ethiopia	3	Both	30	80 to 84	494	Stroke	3	1	Number	2000	3615.06	4444.57	2869.57
1	Deaths	179	Ethiopia	3	Both	31	85 to 89	494	Stroke	3	1	Number	2000	1173.73	1489.69	912.399
1	Deaths	179	Ethiopia	3	Both	32	90 to 94	494	Stroke	3	1	Number	2000	302.232	385.998	228.878
1	Deaths	179	Ethiopia	3	Both	158	<20 years	494	Stroke	3	1	Number	2000	596.666	782.348	433.526
1	Deaths	179	Ethiopia	3	Both	159	10 to 24	494	Stroke	3	1	Number	2000	626.075	784.149	481.321
1	Deaths	179	Ethiopia	3	Both	169	10 to 54	494	Stroke	3	1	Number	2000	6659.61	7978.72	5596.55
1	Deaths	179	Ethiopia	3	Both	235	95 plus	494	Stroke	3	1	Number	2000	52.0217	68.8616	38.3946
1	Deaths	179	Ethiopia	3	Both	1	Under 5	495	Ischemic stroke	4	1	Number	2000	6.46876	11.7944	3.10682
1	Deaths	179	Ethiopia	3	Both	4	Post Neonatal	495	Ischemic stroke	4	1	Number	2000	1.8399	3.93005	0.752116
1	Deaths	179	Ethiopia	3	Both	5	1 to 4	495	Ischemic stroke	4	1	Number	2000	4.62886	9.20266	1.98062
1	Deaths	179	Ethiopia	3	Both	6	5 to 9	495	Ischemic stroke	4	1	Number	2000	2.23804	4.1101	1.06236
1	Deaths	179	Ethiopia	3	Both	7	10 to 14	495	Ischemic stroke	4	1	Number	2000	2.82448	5.00793	1.49406
1	Deaths	179	Ethiopia	3	Both	8	15 to 19	495	Ischemic stroke	4	1	Number	2000	19.9539	32.5976	10.8197
1	Deaths	179	Ethiopia	3	Both	9	20 to 24	495	Ischemic stroke	4	1	Number	2000	21.7815	34.7129	13.0074
1	Deaths	179	Ethiopia	3	Both	10	25 to 29	495	Ischemic stroke	4	1	Number	2000	16.8543	27.0246	9.7593
1	Deaths	179	Ethiopia	3	Both	11	30 to 34	495	Ischemic stroke	4	1	Number	2000	30.8381	48.0226	17.9224
1	Deaths	179	Ethiopia	3	Both	12	35 to 39	495	Ischemic stroke	4	1	Number	2000	35.037	56.0793	21.8166
1	Deaths	179	Ethiopia	3	Both	13	40 to 44	495	Ischemic stroke	4	1	Number	2000	75.2304	119.424	46.137
1	Deaths	179	Ethiopia	3	Both	14	45 to 49	495	Ischemic stroke	4	1	Number	2000	144.09	220.242	91.4321
1	Deaths	179	Ethiopia	3	Both	15	50 to 54	495	Ischemic stroke	4	1	Number	2000	260.772	373.814	169.921
1	Deaths	179	Ethiopia	3	Both	16	55 to 59	495	Ischemic stroke	4	1	Number	2000	375.457	532.056	242.957
1	Deaths	179	Ethiopia	3	Both	17	60 to 64	495	Ischemic stroke	4	1	Number	2000	1066.33	1478.24	733.551
1	Deaths	179	Ethiopia	3	Both	18	65 to 69	495	Ischemic stroke	4	1	Number	2000	1502.71	2046.96	1028.94
1	Deaths	179	Ethiopia	3	Both	19	70 to 74	495	Ischemic stroke	4	1	Number	2000	1840.58	2497.83	1314.62
1	Deaths	179	Ethiopia	3	Both	20	75 to 79	495	Ischemic stroke	4	1	Number	2000	2331.89	3018.3	1722.77
1	Deaths	179	Ethiopia	3	Both	22	All Ages	495	Ischemic stroke	4	1	Number	2000	10165.5	12290.7	8054.27
1	Deaths	179	Ethiopia	3	Both	23	5-14 years	495	Ischemic stroke	4	1	Number	2000	5.06252	8.33703	2.66754
1	Deaths	179	Ethiopia	3	Both	24	15-49 years	495	Ischemic stroke	4	1	Number	2000	343.785	471.511	247.766
1	Deaths	179	Ethiopia	3	Both	25	50-69 years	495	Ischemic stroke	4	1	Number	2000	3205.27	4198.01	2341.33
1	Deaths	179	Ethiopia	3	Both	26	70+ years	495	Ischemic stroke	4	1	Number	2000	6604.89	8014.35	5131.78
1	Deaths	179	Ethiopia	3	Both	28	<1 year	495	Ischemic stroke	4	1	Number	2000	1.8399	3.93005	0.752116
1	Deaths	179	Ethiopia	3	Both	30	80 to 84	495	Ischemic stroke	4	1	Number	2000	1678.01	2156.87	1216.99
1	Deaths	179	Ethiopia	3	Both	31	85 to 89	495	Ischemic stroke	4	1	Number	2000	574.134	754.249	426.754
1	Deaths	179	Ethiopia	3	Both	32	90 to 94	495	Ischemic stroke	4	1	Number	2000	153.162	202.811	108.802
1	Deaths	179	Ethiopia	3	Both	158	<20 years	495	Ischemic stroke	4	1	Number	2000	31.4851	47.4675	19.5375
1	Deaths	179	Ethiopia	3	Both	159	10 to 24	495	Ischemic stroke	4	1	Number	2000	44.5598	64.6844	28.4033
1	Deaths	179	Ethiopia	3	Both	169	10 to 54	495	Ischemic stroke	4	1	Number	2000	607.382	816.068	434.005
1	Deaths	179	Ethiopia	3	Both	235	95 plus	495	Ischemic stroke	4	1	Number	2000	27.1063	36.8473	18.2458
1	Deaths	179	Ethiopia	3	Both	1	Under 5	496	Intracerebral hemorrhage	4	1	Number	2000	196.735	301.353	118.761
1	Deaths	179	Ethiopia	3	Both	2	Early Neonatal	496	Intracerebral hemorrhage	4	1	Number	2000	17.2376	26.9794	9.73312
1	Deaths	179	Ethiopia	3	Both	3	Late Neonatal	496	Intracerebral hemorrhage	4	1	Number	2000	12.708	22.5483	5.83104
1	Deaths	179	Ethiopia	3	Both	4	Post Neonatal	496	Intracerebral hemorrhage	4	1	Number	2000	58.0481	99.2932	29.5293
1	Deaths	179	Ethiopia	3	Both	5	1 to 4	496	Intracerebral hemorrhage	4	1	Number	2000	108.741	184.784	56.3102
1	Deaths	179	Ethiopia	3	Both	6	5 to 9	496	Intracerebral hemorrhage	4	1	Number	2000	57.0526	91.1527	31.317
1	Deaths	179	Ethiopia	3	Both	7	10 to 14	496	Intracerebral hemorrhage	4	1	Number	2000	87.8506	126.105	56.9592
1	Deaths	179	Ethiopia	3	Both	8	15 to 19	496	Intracerebral hemorrhage	4	1	Number	2000	223.543	298.702	159.563
1	Deaths	179	Ethiopia	3	Both	9	20 to 24	496	Intracerebral hemorrhage	4	1	Number	2000	270.121	356.998	194.496
1	Deaths	179	Ethiopia	3	Both	10	25 to 29	496	Intracerebral hemorrhage	4	1	Number	2000	193.034	262.233	137.252
1	Deaths	179	Ethiopia	3	Both	11	30 to 34	496	Intracerebral hemorrhage	4	1	Number	2000	379.673	510.396	275.871
1	Deaths	179	Ethiopia	3	Both	12	35 to 39	496	Intracerebral hemorrhage	4	1	Number	2000	456.462	609.122	326.931
1	Deaths	179	Ethiopia	3	Both	13	40 to 44	496	Intracerebral hemorrhage	4	1	Number	2000	967.923	1263.84	731.769
1	Deaths	179	Ethiopia	3	Both	14	45 to 49	496	Intracerebral hemorrhage	4	1	Number	2000	1344.56	1737.12	1013.36
1	Deaths	179	Ethiopia	3	Both	15	50 to 54	496	Intracerebral hemorrhage	4	1	Number	2000	2129.06	2701.24	1637.61
1	Deaths	179	Ethiopia	3	Both	16	55 to 59	496	Intracerebral hemorrhage	4	1	Number	2000	2560.32	3232.18	1988.89
1	Deaths	179	Ethiopia	3	Both	17	60 to 64	496	Intracerebral hemorrhage	4	1	Number	2000	3169.09	3962.47	2436.16
1	Deaths	179	Ethiopia	3	Both	18	65 to 69	496	Intracerebral hemorrhage	4	1	Number	2000	3755.68	4741.55	2911.72
1	Deaths	179	Ethiopia	3	Both	19	70 to 74	496	Intracerebral hemorrhage	4	1	Number	2000	3975.03	5037.64	2996.22
1	Deaths	179	Ethiopia	3	Both	20	75 to 79	496	Intracerebral hemorrhage	4	1	Number	2000	2952.09	3828.52	2219.5
1	Deaths	179	Ethiopia	3	Both	22	All Ages	496	Intracerebral hemorrhage	4	1	Number	2000	25428.9	30002.8	21389.6
1	Deaths	179	Ethiopia	3	Both	23	5-14 years	496	Intracerebral hemorrhage	4	1	Number	2000	144.903	205.198	95.1122
1	Deaths	179	Ethiopia	3	Both	24	15-49 years	496	Intracerebral hemorrhage	4	1	Number	2000	3835.31	4637.51	3168.63
1	Deaths	179	Ethiopia	3	Both	25	50-69 years	496	Intracerebral hemorrhage	4	1	Number	2000	11614.2	13921.8	9651.43
1	Deaths	179	Ethiopia	3	Both	26	70+ years	496	Intracerebral hemorrhage	4	1	Number	2000	9637.75	11810.8	7597.21
1	Deaths	179	Ethiopia	3	Both	28	<1 year	496	Intracerebral hemorrhage	4	1	Number	2000	87.9936	134.645	53.7786
1	Deaths	179	Ethiopia	3	Both	30	80 to 84	496	Intracerebral hemorrhage	4	1	Number	2000	1937.06	2507	1400.12
1	Deaths	179	Ethiopia	3	Both	31	85 to 89	496	Intracerebral hemorrhage	4	1	Number	2000	599.591	819.377	440.807
1	Deaths	179	Ethiopia	3	Both	32	90 to 94	496	Intracerebral hemorrhage	4	1	Number	2000	149.071	207.662	104.585
1	Deaths	179	Ethiopia	3	Both	158	<20 years	496	Intracerebral hemorrhage	4	1	Number	2000	565.181	737.308	412.717
1	Deaths	179	Ethiopia	3	Both	159	10 to 24	496	Intracerebral hemorrhage	4	1	Number	2000	581.515	728.118	447.171
1	Deaths	179	Ethiopia	3	Both	169	10 to 54	496	Intracerebral hemorrhage	4	1	Number	2000	6052.22	7242.13	5057.37
1	Deaths	179	Ethiopia	3	Both	235	95 plus	496	Intracerebral hemorrhage	4	1	Number	2000	24.9153	35.1132	17.0106
1	Deaths	179	Ethiopia	3	Both	1	Under 5	498	Hypertensive heart disease	3	1	Number	2000	4.69108	9.70803	0.914241
1	Deaths	179	Ethiopia	3	Both	4	Post Neonatal	498	Hypertensive heart disease	3	1	Number	2000	1.05679	2.10027	0.269262
1	Deaths	179	Ethiopia	3	Both	5	1 to 4	498	Hypertensive heart disease	3	1	Number	2000	3.63429	8.07179	0.615978
1	Deaths	179	Ethiopia	3	Both	6	5 to 9	498	Hypertensive heart disease	3	1	Number	2000	1.99181	4.18407	0.848698
1	Deaths	179	Ethiopia	3	Both	7	10 to 14	498	Hypertensive heart disease	3	1	Number	2000	4.13781	10.0149	1.48491
1	Deaths	179	Ethiopia	3	Both	8	15 to 19	498	Hypertensive heart disease	3	1	Number	2000	32.0815	62.453	13.5666
1	Deaths	179	Ethiopia	3	Both	9	20 to 24	498	Hypertensive heart disease	3	1	Number	2000	37.6317	64.4196	16.4381
1	Deaths	179	Ethiopia	3	Both	10	25 to 29	498	Hypertensive heart disease	3	1	Number	2000	52.6048	88.2061	22.8271
1	Deaths	179	Ethiopia	3	Both	11	30 to 34	498	Hypertensive heart disease	3	1	Number	2000	80.4494	139.401	34.9441
1	Deaths	179	Ethiopia	3	Both	12	35 to 39	498	Hypertensive heart disease	3	1	Number	2000	129.709	226.263	58.8108
1	Deaths	179	Ethiopia	3	Both	13	40 to 44	498	Hypertensive heart disease	3	1	Number	2000	216.857	357.222	100.048
1	Deaths	179	Ethiopia	3	Both	14	45 to 49	498	Hypertensive heart disease	3	1	Number	2000	294.382	495.067	132.682
1	Deaths	179	Ethiopia	3	Both	15	50 to 54	498	Hypertensive heart disease	3	1	Number	2000	465.001	782.175	217.974
1	Deaths	179	Ethiopia	3	Both	16	55 to 59	498	Hypertensive heart disease	3	1	Number	2000	626.012	1020.96	312.598
1	Deaths	179	Ethiopia	3	Both	17	60 to 64	498	Hypertensive heart disease	3	1	Number	2000	738.308	1190.51	385.799
1	Deaths	179	Ethiopia	3	Both	18	65 to 69	498	Hypertensive heart disease	3	1	Number	2000	988.836	1589.89	520.792
1	Deaths	179	Ethiopia	3	Both	19	70 to 74	498	Hypertensive heart disease	3	1	Number	2000	975.426	1582.74	514.752
1	Deaths	179	Ethiopia	3	Both	20	75 to 79	498	Hypertensive heart disease	3	1	Number	2000	1095.37	1750.6	617.001
1	Deaths	179	Ethiopia	3	Both	22	All Ages	498	Hypertensive heart disease	3	1	Number	2000	7096.63	10174.6	4224.22
1	Deaths	179	Ethiopia	3	Both	23	5-14 years	498	Hypertensive heart disease	3	1	Number	2000	6.12961	12.8274	2.58348
1	Deaths	179	Ethiopia	3	Both	24	15-49 years	498	Hypertensive heart disease	3	1	Number	2000	843.715	1287.48	415.25
1	Deaths	179	Ethiopia	3	Both	25	50-69 years	498	Hypertensive heart disease	3	1	Number	2000	2818.16	4248.79	1514.92
1	Deaths	179	Ethiopia	3	Both	26	70+ years	498	Hypertensive heart disease	3	1	Number	2000	3423.93	4968.97	2100.06
1	Deaths	179	Ethiopia	3	Both	28	<1 year	498	Hypertensive heart disease	3	1	Number	2000	1.05679	2.10027	0.269262
1	Deaths	179	Ethiopia	3	Both	30	80 to 84	498	Hypertensive heart disease	3	1	Number	2000	818.246	1268.12	477.669
1	Deaths	179	Ethiopia	3	Both	31	85 to 89	498	Hypertensive heart disease	3	1	Number	2000	384.007	586.402	226.915
1	Deaths	179	Ethiopia	3	Both	32	90 to 94	498	Hypertensive heart disease	3	1	Number	2000	122.03	180.06	70.2088
1	Deaths	179	Ethiopia	3	Both	158	<20 years	498	Hypertensive heart disease	3	1	Number	2000	42.9022	78.4515	18.8356
1	Deaths	179	Ethiopia	3	Both	159	10 to 24	498	Hypertensive heart disease	3	1	Number	2000	73.851	124.506	35.0207
1	Deaths	179	Ethiopia	3	Both	169	10 to 54	498	Hypertensive heart disease	3	1	Number	2000	1312.85	2028.95	641.167
1	Deaths	179	Ethiopia	3	Both	235	95 plus	498	Hypertensive heart disease	3	1	Number	2000	28.8517	43.4038	16.3042
1	Deaths	179	Ethiopia	3	Both	1	Under 5	499	Cardiomyopathy and myocarditis	3	1	Number	2000	177.59	263.616	105.438
1	Deaths	179	Ethiopia	3	Both	2	Early Neonatal	499	Cardiomyopathy and myocarditis	3	1	Number	2000	23.5232	39.0585	12.7113
1	Deaths	179	Ethiopia	3	Both	3	Late Neonatal	499	Cardiomyopathy and myocarditis	3	1	Number	2000	15.6805	29.5122	7.44234
1	Deaths	179	Ethiopia	3	Both	4	Post Neonatal	499	Cardiomyopathy and myocarditis	3	1	Number	2000	69.2285	118.651	36.7216
1	Deaths	179	Ethiopia	3	Both	5	1 to 4	499	Cardiomyopathy and myocarditis	3	1	Number	2000	69.1577	121.734	30.9268
1	Deaths	179	Ethiopia	3	Both	6	5 to 9	499	Cardiomyopathy and myocarditis	3	1	Number	2000	16.2664	27.635	8.44726
1	Deaths	179	Ethiopia	3	Both	7	10 to 14	499	Cardiomyopathy and myocarditis	3	1	Number	2000	18.4215	29.521	10.9417
1	Deaths	179	Ethiopia	3	Both	8	15 to 19	499	Cardiomyopathy and myocarditis	3	1	Number	2000	22.5343	35.8926	13.6234
1	Deaths	179	Ethiopia	3	Both	9	20 to 24	499	Cardiomyopathy and myocarditis	3	1	Number	2000	23.4313	36.1511	14.3206
1	Deaths	179	Ethiopia	3	Both	10	25 to 29	499	Cardiomyopathy and myocarditis	3	1	Number	2000	32.1405	48.2091	20.2214
1	Deaths	179	Ethiopia	3	Both	11	30 to 34	499	Cardiomyopathy and myocarditis	3	1	Number	2000	40.1537	59.5072	25.3398
1	Deaths	179	Ethiopia	3	Both	12	35 to 39	499	Cardiomyopathy and myocarditis	3	1	Number	2000	53.1522	80.5204	32.0785
1	Deaths	179	Ethiopia	3	Both	13	40 to 44	499	Cardiomyopathy and myocarditis	3	1	Number	2000	73.9654	110.854	44.5003
1	Deaths	179	Ethiopia	3	Both	14	45 to 49	499	Cardiomyopathy and myocarditis	3	1	Number	2000	80.7179	122.695	49.9458
1	Deaths	179	Ethiopia	3	Both	15	50 to 54	499	Cardiomyopathy and myocarditis	3	1	Number	2000	97.1907	146.178	59.6652
1	Deaths	179	Ethiopia	3	Both	16	55 to 59	499	Cardiomyopathy and myocarditis	3	1	Number	2000	111.079	163.297	69.4075
1	Deaths	179	Ethiopia	3	Both	17	60 to 64	499	Cardiomyopathy and myocarditis	3	1	Number	2000	105.596	151.985	69.8604
1	Deaths	179	Ethiopia	3	Both	18	65 to 69	499	Cardiomyopathy and myocarditis	3	1	Number	2000	106.464	152.925	69.7241
1	Deaths	179	Ethiopia	3	Both	19	70 to 74	499	Cardiomyopathy and myocarditis	3	1	Number	2000	85.1024	117.956	58.476
1	Deaths	179	Ethiopia	3	Both	20	75 to 79	499	Cardiomyopathy and myocarditis	3	1	Number	2000	85.6574	123.621	57.7224
1	Deaths	179	Ethiopia	3	Both	22	All Ages	499	Cardiomyopathy and myocarditis	3	1	Number	2000	1229.26	1548.63	940.257
1	Deaths	179	Ethiopia	3	Both	23	5-14 years	499	Cardiomyopathy and myocarditis	3	1	Number	2000	34.6879	53.3991	21.3787
1	Deaths	179	Ethiopia	3	Both	24	15-49 years	499	Cardiomyopathy and myocarditis	3	1	Number	2000	326.095	432.947	236.656
1	Deaths	179	Ethiopia	3	Both	25	50-69 years	499	Cardiomyopathy and myocarditis	3	1	Number	2000	420.329	561.971	293.629
1	Deaths	179	Ethiopia	3	Both	26	70+ years	499	Cardiomyopathy and myocarditis	3	1	Number	2000	270.554	356.004	205.84
1	Deaths	179	Ethiopia	3	Both	28	<1 year	499	Cardiomyopathy and myocarditis	3	1	Number	2000	108.432	161.84	64.9821
1	Deaths	179	Ethiopia	3	Both	30	80 to 84	499	Cardiomyopathy and myocarditis	3	1	Number	2000	61.6303	84.8887	43.0022
1	Deaths	179	Ethiopia	3	Both	31	85 to 89	499	Cardiomyopathy and myocarditis	3	1	Number	2000	29.3774	40.6672	20.8998
1	Deaths	179	Ethiopia	3	Both	32	90 to 94	499	Cardiomyopathy and myocarditis	3	1	Number	2000	7.30801	10.1934	5.17586
1	Deaths	179	Ethiopia	3	Both	158	<20 years	499	Cardiomyopathy and myocarditis	3	1	Number	2000	234.812	336.429	153.276
1	Deaths	179	Ethiopia	3	Both	159	10 to 24	499	Cardiomyopathy and myocarditis	3	1	Number	2000	64.3872	94.7661	44.6428
1	Deaths	179	Ethiopia	3	Both	169	10 to 54	499	Cardiomyopathy and myocarditis	3	1	Number	2000	441.708	578.277	326.495
1	Deaths	179	Ethiopia	3	Both	235	95 plus	499	Cardiomyopathy and myocarditis	3	1	Number	2000	1.47858	2.18648	0.995561
1	Deaths	179	Ethiopia	3	Both	1	Under 5	500	Atrial fibrillation and flutter	3	1	Number	2000	0	0	0
1	Deaths	179	Ethiopia	3	Both	2	Early Neonatal	500	Atrial fibrillation and flutter	3	1	Number	2000	0	0	0
1	Deaths	179	Ethiopia	3	Both	3	Late Neonatal	500	Atrial fibrillation and flutter	3	1	Number	2000	0	0	0
1	Deaths	179	Ethiopia	3	Both	4	Post Neonatal	500	Atrial fibrillation and flutter	3	1	Number	2000	0	0	0
1	Deaths	179	Ethiopia	3	Both	5	1 to 4	500	Atrial fibrillation and flutter	3	1	Number	2000	0	0	0
1	Deaths	179	Ethiopia	3	Both	6	5 to 9	500	Atrial fibrillation and flutter	3	1	Number	2000	0	0	0
1	Deaths	179	Ethiopia	3	Both	7	10 to 14	500	Atrial fibrillation and flutter	3	1	Number	2000	0	0	0
1	Deaths	179	Ethiopia	3	Both	8	15 to 19	500	Atrial fibrillation and flutter	3	1	Number	2000	0	0	0
1	Deaths	179	Ethiopia	3	Both	9	20 to 24	500	Atrial fibrillation and flutter	3	1	Number	2000	0	0	0
1	Deaths	179	Ethiopia	3	Both	10	25 to 29	500	Atrial fibrillation and flutter	3	1	Number	2000	0	0	0
1	Deaths	179	Ethiopia	3	Both	11	30 to 34	500	Atrial fibrillation and flutter	3	1	Number	2000	0.218234	0.332501	0.134088
1	Deaths	179	Ethiopia	3	Both	12	35 to 39	500	Atrial fibrillation and flutter	3	1	Number	2000	0.757071	1.11444	0.493932
1	Deaths	179	Ethiopia	3	Both	13	40 to 44	500	Atrial fibrillation and flutter	3	1	Number	2000	1.74323	2.57885	1.13646
1	Deaths	179	Ethiopia	3	Both	14	45 to 49	500	Atrial fibrillation and flutter	3	1	Number	2000	2.95261	4.32758	1.90774
1	Deaths	179	Ethiopia	3	Both	15	50 to 54	500	Atrial fibrillation and flutter	3	1	Number	2000	5.04703	7.37861	3.39018
1	Deaths	179	Ethiopia	3	Both	16	55 to 59	500	Atrial fibrillation and flutter	3	1	Number	2000	8.6265	13.6218	4.88443
1	Deaths	179	Ethiopia	3	Both	17	60 to 64	500	Atrial fibrillation and flutter	3	1	Number	2000	16.4346	24.391	10.0457
1	Deaths	179	Ethiopia	3	Both	18	65 to 69	500	Atrial fibrillation and flutter	3	1	Number	2000	32.2658	51.2002	19.3423
1	Deaths	179	Ethiopia	3	Both	19	70 to 74	500	Atrial fibrillation and flutter	3	1	Number	2000	48.4931	71.7573	31.9436
1	Deaths	179	Ethiopia	3	Both	20	75 to 79	500	Atrial fibrillation and flutter	3	1	Number	2000	77.0768	118.86	46.2052
1	Deaths	179	Ethiopia	3	Both	22	All Ages	500	Atrial fibrillation and flutter	3	1	Number	2000	463.365	605.356	345.108
1	Deaths	179	Ethiopia	3	Both	23	5-14 years	500	Atrial fibrillation and flutter	3	1	Number	2000	0	0	0
1	Deaths	179	Ethiopia	3	Both	24	15-49 years	500	Atrial fibrillation and flutter	3	1	Number	2000	5.67114	8.01744	3.84476
1	Deaths	179	Ethiopia	3	Both	25	50-69 years	500	Atrial fibrillation and flutter	3	1	Number	2000	62.374	88.2572	42.0331
1	Deaths	179	Ethiopia	3	Both	26	70+ years	500	Atrial fibrillation and flutter	3	1	Number	2000	395.32	523.641	286.188
1	Deaths	179	Ethiopia	3	Both	28	<1 year	500	Atrial fibrillation and flutter	3	1	Number	2000	0	0	0
1	Deaths	179	Ethiopia	3	Both	30	80 to 84	500	Atrial fibrillation and flutter	3	1	Number	2000	133.836	186.824	92.3137
1	Deaths	179	Ethiopia	3	Both	31	85 to 89	500	Atrial fibrillation and flutter	3	1	Number	2000	99.2818	138.826	69.2773
1	Deaths	179	Ethiopia	3	Both	32	90 to 94	500	Atrial fibrillation and flutter	3	1	Number	2000	31.1023	44.0807	21.496
1	Deaths	179	Ethiopia	3	Both	158	<20 years	500	Atrial fibrillation and flutter	3	1	Number	2000	0	0	0
1	Deaths	179	Ethiopia	3	Both	159	10 to 24	500	Atrial fibrillation and flutter	3	1	Number	2000	0	0	0
1	Deaths	179	Ethiopia	3	Both	169	10 to 54	500	Atrial fibrillation and flutter	3	1	Number	2000	10.7182	14.9336	7.50609
1	Deaths	179	Ethiopia	3	Both	235	95 plus	500	Atrial fibrillation and flutter	3	1	Number	2000	5.53024	7.64035	3.77975
1	Deaths	179	Ethiopia	3	Both	8	15 to 19	501	Aortic aneurysm	3	1	Number	2000	6.71093	11.4119	3.50078
1	Deaths	179	Ethiopia	3	Both	9	20 to 24	501	Aortic aneurysm	3	1	Number	2000	7.33917	12.5252	3.89111
1	Deaths	179	Ethiopia	3	Both	10	25 to 29	501	Aortic aneurysm	3	1	Number	2000	9.91136	17.9514	4.67311
1	Deaths	179	Ethiopia	3	Both	11	30 to 34	501	Aortic aneurysm	3	1	Number	2000	11.8467	21.8338	4.51991
1	Deaths	179	Ethiopia	3	Both	12	35 to 39	501	Aortic aneurysm	3	1	Number	2000	16.4015	31.5519	6.62911
1	Deaths	179	Ethiopia	3	Both	13	40 to 44	501	Aortic aneurysm	3	1	Number	2000	21.8076	40.3244	9.58605
1	Deaths	179	Ethiopia	3	Both	14	45 to 49	501	Aortic aneurysm	3	1	Number	2000	26.8703	48.8817	13.6078
1	Deaths	179	Ethiopia	3	Both	15	50 to 54	501	Aortic aneurysm	3	1	Number	2000	35.9451	64.265	18.95
1	Deaths	179	Ethiopia	3	Both	16	55 to 59	501	Aortic aneurysm	3	1	Number	2000	52.2346	91.6183	29.8287
1	Deaths	179	Ethiopia	3	Both	17	60 to 64	501	Aortic aneurysm	3	1	Number	2000	69.5701	113.576	42.206
1	Deaths	179	Ethiopia	3	Both	18	65 to 69	501	Aortic aneurysm	3	1	Number	2000	93.8078	152.688	56.7158
1	Deaths	179	Ethiopia	3	Both	19	70 to 74	501	Aortic aneurysm	3	1	Number	2000	86.1782	138.492	52.3367
1	Deaths	179	Ethiopia	3	Both	20	75 to 79	501	Aortic aneurysm	3	1	Number	2000	93.1348	144.399	57.5031
1	Deaths	179	Ethiopia	3	Both	22	All Ages	501	Aortic aneurysm	3	1	Number	2000	637.512	963.262	443.083
1	Deaths	179	Ethiopia	3	Both	24	15-49 years	501	Aortic aneurysm	3	1	Number	2000	100.887	168.013	52.7742
1	Deaths	179	Ethiopia	3	Both	25	50-69 years	501	Aortic aneurysm	3	1	Number	2000	251.558	401.013	163.985
1	Deaths	179	Ethiopia	3	Both	26	70+ years	501	Aortic aneurysm	3	1	Number	2000	285.067	411.972	188.935
1	Deaths	179	Ethiopia	3	Both	30	80 to 84	501	Aortic aneurysm	3	1	Number	2000	67.6521	100.855	41.7253
1	Deaths	179	Ethiopia	3	Both	31	85 to 89	501	Aortic aneurysm	3	1	Number	2000	29.4776	42.2363	17.4135
1	Deaths	179	Ethiopia	3	Both	32	90 to 94	501	Aortic aneurysm	3	1	Number	2000	7.51678	10.627	4.47502
1	Deaths	179	Ethiopia	3	Both	158	<20 years	501	Aortic aneurysm	3	1	Number	2000	6.71093	11.4119	3.50078
1	Deaths	179	Ethiopia	3	Both	159	10 to 24	501	Aortic aneurysm	3	1	Number	2000	14.0501	22.5751	8.22276
1	Deaths	179	Ethiopia	3	Both	169	10 to 54	501	Aortic aneurysm	3	1	Number	2000	136.833	228.178	73.621
1	Deaths	179	Ethiopia	3	Both	235	95 plus	501	Aortic aneurysm	3	1	Number	2000	1.10758	1.56666	0.634075
1	Deaths	179	Ethiopia	3	Both	13	40 to 44	502	Peripheral artery disease	3	1	Number	2000	0.576521	1.4231	0.255329
1	Deaths	179	Ethiopia	3	Both	14	45 to 49	502	Peripheral artery disease	3	1	Number	2000	0.605964	1.53206	0.222166
1	Deaths	179	Ethiopia	3	Both	15	50 to 54	502	Peripheral artery disease	3	1	Number	2000	1.37131	3.62991	0.379624
1	Deaths	179	Ethiopia	3	Both	16	55 to 59	502	Peripheral artery disease	3	1	Number	2000	2.19423	5.22775	0.594257
1	Deaths	179	Ethiopia	3	Both	17	60 to 64	502	Peripheral artery disease	3	1	Number	2000	3.35619	7.64071	0.95718
1	Deaths	179	Ethiopia	3	Both	18	65 to 69	502	Peripheral artery disease	3	1	Number	2000	4.62563	10.8959	1.32091
1	Deaths	179	Ethiopia	3	Both	19	70 to 74	502	Peripheral artery disease	3	1	Number	2000	5.59243	12.1423	1.65299
1	Deaths	179	Ethiopia	3	Both	20	75 to 79	502	Peripheral artery disease	3	1	Number	2000	6.74073	15.5733	1.96414
1	Deaths	179	Ethiopia	3	Both	22	All Ages	502	Peripheral artery disease	3	1	Number	2000	37.8113	73.8287	11.1902
1	Deaths	179	Ethiopia	3	Both	24	15-49 years	502	Peripheral artery disease	3	1	Number	2000	1.18249	2.67631	0.500854
1	Deaths	179	Ethiopia	3	Both	25	50-69 years	502	Peripheral artery disease	3	1	Number	2000	11.5474	24.5059	3.36032
1	Deaths	179	Ethiopia	3	Both	26	70+ years	502	Peripheral artery disease	3	1	Number	2000	25.0814	50.6657	7.09883
1	Deaths	179	Ethiopia	3	Both	30	80 to 84	502	Peripheral artery disease	3	1	Number	2000	7.21247	15.9794	2.01251
1	Deaths	179	Ethiopia	3	Both	31	85 to 89	502	Peripheral artery disease	3	1	Number	2000	3.86854	8.31962	1.01159
1	Deaths	179	Ethiopia	3	Both	32	90 to 94	502	Peripheral artery disease	3	1	Number	2000	1.36817	2.93481	0.352096
1	Deaths	179	Ethiopia	3	Both	169	10 to 54	502	Peripheral artery disease	3	1	Number	2000	2.55379	5.71533	0.897368
1	Deaths	179	Ethiopia	3	Both	235	95 plus	502	Peripheral artery disease	3	1	Number	2000	0.299069	0.702329	0.0770461
1	Deaths	179	Ethiopia	3	Both	1	Under 5	503	Endocarditis	3	1	Number	2000	32.4305	63.4452	14.8251
1	Deaths	179	Ethiopia	3	Both	2	Early Neonatal	503	Endocarditis	3	1	Number	2000	1.22721	2.23142	0.590808
1	Deaths	179	Ethiopia	3	Both	3	Late Neonatal	503	Endocarditis	3	1	Number	2000	0.983165	1.97598	0.400177
1	Deaths	179	Ethiopia	3	Both	4	Post Neonatal	503	Endocarditis	3	1	Number	2000	15.5076	30.7275	6.72069
1	Deaths	179	Ethiopia	3	Both	5	1 to 4	503	Endocarditis	3	1	Number	2000	14.7125	38.1586	4.82863
1	Deaths	179	Ethiopia	3	Both	6	5 to 9	503	Endocarditis	3	1	Number	2000	10.5037	21.2689	4.48641
1	Deaths	179	Ethiopia	3	Both	7	10 to 14	503	Endocarditis	3	1	Number	2000	18.9978	32.5284	9.61083
1	Deaths	179	Ethiopia	3	Both	8	15 to 19	503	Endocarditis	3	1	Number	2000	30.8784	51.5765	17.0428
1	Deaths	179	Ethiopia	3	Both	9	20 to 24	503	Endocarditis	3	1	Number	2000	32.1309	52.5051	18.2797
1	Deaths	179	Ethiopia	3	Both	10	25 to 29	503	Endocarditis	3	1	Number	2000	34.6348	56.8475	19.249
1	Deaths	179	Ethiopia	3	Both	11	30 to 34	503	Endocarditis	3	1	Number	2000	29.4078	45.5168	17.3674
1	Deaths	179	Ethiopia	3	Both	12	35 to 39	503	Endocarditis	3	1	Number	2000	32.1523	48.4892	19.068
1	Deaths	179	Ethiopia	3	Both	13	40 to 44	503	Endocarditis	3	1	Number	2000	39.658	58.9749	24.7633
1	Deaths	179	Ethiopia	3	Both	14	45 to 49	503	Endocarditis	3	1	Number	2000	35.4503	51.9054	21.7884
1	Deaths	179	Ethiopia	3	Both	15	50 to 54	503	Endocarditis	3	1	Number	2000	43.19	61.3061	27.6924
1	Deaths	179	Ethiopia	3	Both	16	55 to 59	503	Endocarditis	3	1	Number	2000	50.4529	71.2837	31.3949
1	Deaths	179	Ethiopia	3	Both	17	60 to 64	503	Endocarditis	3	1	Number	2000	61.1134	89.347	36.7925
1	Deaths	179	Ethiopia	3	Both	18	65 to 69	503	Endocarditis	3	1	Number	2000	73.4727	111.971	43.9456
1	Deaths	179	Ethiopia	3	Both	19	70 to 74	503	Endocarditis	3	1	Number	2000	66.4235	105.399	37.7744
1	Deaths	179	Ethiopia	3	Both	20	75 to 79	503	Endocarditis	3	1	Number	2000	71.9301	119.087	40.3911
1	Deaths	179	Ethiopia	3	Both	22	All Ages	503	Endocarditis	3	1	Number	2000	762.405	990.897	523.855
1	Deaths	179	Ethiopia	3	Both	23	5-14 years	503	Endocarditis	3	1	Number	2000	29.5015	48.4194	15.5324
1	Deaths	179	Ethiopia	3	Both	24	15-49 years	503	Endocarditis	3	1	Number	2000	234.313	317.6	155.348
1	Deaths	179	Ethiopia	3	Both	25	50-69 years	503	Endocarditis	3	1	Number	2000	228.229	309.399	150.518
1	Deaths	179	Ethiopia	3	Both	26	70+ years	503	Endocarditis	3	1	Number	2000	237.931	336.021	139.394
1	Deaths	179	Ethiopia	3	Both	28	<1 year	503	Endocarditis	3	1	Number	2000	17.718	33.1658	8.6013
1	Deaths	179	Ethiopia	3	Both	30	80 to 84	503	Endocarditis	3	1	Number	2000	58.5366	91.6938	31.361
1	Deaths	179	Ethiopia	3	Both	31	85 to 89	503	Endocarditis	3	1	Number	2000	29.0116	45.8132	14.7823
1	Deaths	179	Ethiopia	3	Both	32	90 to 94	503	Endocarditis	3	1	Number	2000	9.90094	17.0588	4.09223
1	Deaths	179	Ethiopia	3	Both	158	<20 years	503	Endocarditis	3	1	Number	2000	92.8104	134.735	53.3529
1	Deaths	179	Ethiopia	3	Both	159	10 to 24	503	Endocarditis	3	1	Number	2000	82.007	123.525	49.876
1	Deaths	179	Ethiopia	3	Both	169	10 to 54	503	Endocarditis	3	1	Number	2000	296.5	399.724	198.783
1	Deaths	179	Ethiopia	3	Both	235	95 plus	503	Endocarditis	3	1	Number	2000	2.12877	3.88254	0.79061
1	Deaths	179	Ethiopia	3	Both	1	Under 5	507	Other cardiovascular and circulatory diseases	3	1	Number	2000	519.984	695.527	359.258
1	Deaths	179	Ethiopia	3	Both	2	Early Neonatal	507	Other cardiovascular and circulatory diseases	3	1	Number	2000	70.2849	96.8129	47.9545
1	Deaths	179	Ethiopia	3	Both	3	Late Neonatal	507	Other cardiovascular and circulatory diseases	3	1	Number	2000	56.9256	89.3774	34.3181
1	Deaths	179	Ethiopia	3	Both	4	Post Neonatal	507	Other cardiovascular and circulatory diseases	3	1	Number	2000	200.681	304.761	122.779
1	Deaths	179	Ethiopia	3	Both	5	1 to 4	507	Other cardiovascular and circulatory diseases	3	1	Number	2000	192.092	303.931	104.517
1	Deaths	179	Ethiopia	3	Both	6	5 to 9	507	Other cardiovascular and circulatory diseases	3	1	Number	2000	72.7887	114.809	38.6612
1	Deaths	179	Ethiopia	3	Both	7	10 to 14	507	Other cardiovascular and circulatory diseases	3	1	Number	2000	90.8799	136.307	56.6254
1	Deaths	179	Ethiopia	3	Both	8	15 to 19	507	Other cardiovascular and circulatory diseases	3	1	Number	2000	118.253	188.164	75.155
1	Deaths	179	Ethiopia	3	Both	9	20 to 24	507	Other cardiovascular and circulatory diseases	3	1	Number	2000	133.899	210.661	83.5833
1	Deaths	179	Ethiopia	3	Both	10	25 to 29	507	Other cardiovascular and circulatory diseases	3	1	Number	2000	149.75	233.884	91.6487
1	Deaths	179	Ethiopia	3	Both	11	30 to 34	507	Other cardiovascular and circulatory diseases	3	1	Number	2000	177.667	279.187	109.224
1	Deaths	179	Ethiopia	3	Both	12	35 to 39	507	Other cardiovascular and circulatory diseases	3	1	Number	2000	229.15	361.469	138.825
1	Deaths	179	Ethiopia	3	Both	13	40 to 44	507	Other cardiovascular and circulatory diseases	3	1	Number	2000	326.871	518.068	198.448
1	Deaths	179	Ethiopia	3	Both	14	45 to 49	507	Other cardiovascular and circulatory diseases	3	1	Number	2000	406.424	629.195	250.562
1	Deaths	179	Ethiopia	3	Both	15	50 to 54	507	Other cardiovascular and circulatory diseases	3	1	Number	2000	587.635	893.23	364.216
1	Deaths	179	Ethiopia	3	Both	16	55 to 59	507	Other cardiovascular and circulatory diseases	3	1	Number	2000	809.255	1235.33	499.583
1	Deaths	179	Ethiopia	3	Both	17	60 to 64	507	Other cardiovascular and circulatory diseases	3	1	Number	2000	1065.93	1603.94	690.511
1	Deaths	179	Ethiopia	3	Both	18	65 to 69	507	Other cardiovascular and circulatory diseases	3	1	Number	2000	1398.13	2073.15	897.59
1	Deaths	179	Ethiopia	3	Both	19	70 to 74	507	Other cardiovascular and circulatory diseases	3	1	Number	2000	1438.48	2168.57	921.901
1	Deaths	179	Ethiopia	3	Both	20	75 to 79	507	Other cardiovascular and circulatory diseases	3	1	Number	2000	1683.53	2510.3	1094.28
1	Deaths	179	Ethiopia	3	Both	22	All Ages	507	Other cardiovascular and circulatory diseases	3	1	Number	2000	11454.6	15521.4	8408.85
1	Deaths	179	Ethiopia	3	Both	23	5-14 years	507	Other cardiovascular and circulatory diseases	3	1	Number	2000	163.669	238.918	102.499
1	Deaths	179	Ethiopia	3	Both	24	15-49 years	507	Other cardiovascular and circulatory diseases	3	1	Number	2000	1542.01	2304.98	1063.19
1	Deaths	179	Ethiopia	3	Both	25	50-69 years	507	Other cardiovascular and circulatory diseases	3	1	Number	2000	3860.96	5547.07	2639.33
1	Deaths	179	Ethiopia	3	Both	26	70+ years	507	Other cardiovascular and circulatory diseases	3	1	Number	2000	5367.95	7452.82	3831
1	Deaths	179	Ethiopia	3	Both	28	<1 year	507	Other cardiovascular and circulatory diseases	3	1	Number	2000	327.891	443.55	232.567
1	Deaths	179	Ethiopia	3	Both	30	80 to 84	507	Other cardiovascular and circulatory diseases	3	1	Number	2000	1358.26	2073.89	902.814
1	Deaths	179	Ethiopia	3	Both	31	85 to 89	507	Other cardiovascular and circulatory diseases	3	1	Number	2000	660.251	993.43	447.632
1	Deaths	179	Ethiopia	3	Both	32	90 to 94	507	Other cardiovascular and circulatory diseases	3	1	Number	2000	190.896	306.166	126.396
1	Deaths	179	Ethiopia	3	Both	158	<20 years	507	Other cardiovascular and circulatory diseases	3	1	Number	2000	801.905	1079.17	574.666
1	Deaths	179	Ethiopia	3	Both	159	10 to 24	507	Other cardiovascular and circulatory diseases	3	1	Number	2000	343.032	515.503	242.75
1	Deaths	179	Ethiopia	3	Both	169	10 to 54	507	Other cardiovascular and circulatory diseases	3	1	Number	2000	2220.53	3302.99	1559.46
1	Deaths	179	Ethiopia	3	Both	235	95 plus	507	Other cardiovascular and circulatory diseases	3	1	Number	2000	36.5356	61.6147	23.435
1	Deaths	179	Ethiopia	3	Both	1	Under 5	508	Chronic respiratory diseases	2	1	Number	2000	548.843	1018.03	250.617
1	Deaths	179	Ethiopia	3	Both	2	Early Neonatal	508	Chronic respiratory diseases	2	1	Number	2000	0	0	0
1	Deaths	179	Ethiopia	3	Both	3	Late Neonatal	508	Chronic respiratory diseases	2	1	Number	2000	0	0	0
1	Deaths	179	Ethiopia	3	Both	4	Post Neonatal	508	Chronic respiratory diseases	2	1	Number	2000	0	0	0
1	Deaths	179	Ethiopia	3	Both	5	1 to 4	508	Chronic respiratory diseases	2	1	Number	2000	548.843	1018.03	250.617
1	Deaths	179	Ethiopia	3	Both	6	5 to 9	508	Chronic respiratory diseases	2	1	Number	2000	127.05	188.142	78.2436
1	Deaths	179	Ethiopia	3	Both	7	10 to 14	508	Chronic respiratory diseases	2	1	Number	2000	115.052	166.945	76.7921
1	Deaths	179	Ethiopia	3	Both	8	15 to 19	508	Chronic respiratory diseases	2	1	Number	2000	146.167	196.184	107.395
1	Deaths	179	Ethiopia	3	Both	9	20 to 24	508	Chronic respiratory diseases	2	1	Number	2000	186.717	241.275	141.81
1	Deaths	179	Ethiopia	3	Both	10	25 to 29	508	Chronic respiratory diseases	2	1	Number	2000	185.004	239.221	138.987
1	Deaths	179	Ethiopia	3	Both	11	30 to 34	508	Chronic respiratory diseases	2	1	Number	2000	228.239	291.38	174.297
1	Deaths	179	Ethiopia	3	Both	12	35 to 39	508	Chronic respiratory diseases	2	1	Number	2000	281.629	363.132	211.392
1	Deaths	179	Ethiopia	3	Both	13	40 to 44	508	Chronic respiratory diseases	2	1	Number	2000	396.403	507.998	299.268
1	Deaths	179	Ethiopia	3	Both	14	45 to 49	508	Chronic respiratory diseases	2	1	Number	2000	525.346	686.746	407.509
1	Deaths	179	Ethiopia	3	Both	15	50 to 54	508	Chronic respiratory diseases	2	1	Number	2000	843.151	1067.66	637.576
1	Deaths	179	Ethiopia	3	Both	16	55 to 59	508	Chronic respiratory diseases	2	1	Number	2000	1344.06	1714	1024.92
1	Deaths	179	Ethiopia	3	Both	17	60 to 64	508	Chronic respiratory diseases	2	1	Number	2000	1460.41	1853.56	1115.07
1	Deaths	179	Ethiopia	3	Both	18	65 to 69	508	Chronic respiratory diseases	2	1	Number	2000	2022.31	2553.13	1516.21
1	Deaths	179	Ethiopia	3	Both	19	70 to 74	508	Chronic respiratory diseases	2	1	Number	2000	2060.87	2617.73	1575.79
1	Deaths	179	Ethiopia	3	Both	20	75 to 79	508	Chronic respiratory diseases	2	1	Number	2000	1847.46	2316.24	1419.8
1	Deaths	179	Ethiopia	3	Both	22	All Ages	508	Chronic respiratory diseases	2	1	Number	2000	14436.2	16286.6	12438
1	Deaths	179	Ethiopia	3	Both	23	5-14 years	508	Chronic respiratory diseases	2	1	Number	2000	242.102	327.456	165.903
1	Deaths	179	Ethiopia	3	Both	24	15-49 years	508	Chronic respiratory diseases	2	1	Number	2000	1949.5	2285.95	1639.72
1	Deaths	179	Ethiopia	3	Both	25	50-69 years	508	Chronic respiratory diseases	2	1	Number	2000	5669.93	6651.48	4717.42
1	Deaths	179	Ethiopia	3	Both	26	70+ years	508	Chronic respiratory diseases	2	1	Number	2000	6025.82	6984.93	5127.15
1	Deaths	179	Ethiopia	3	Both	28	<1 year	508	Chronic respiratory diseases	2	1	Number	2000	0	0	0
1	Deaths	179	Ethiopia	3	Both	30	80 to 84	508	Chronic respiratory diseases	2	1	Number	2000	1347.14	1668.97	1054.47
1	Deaths	179	Ethiopia	3	Both	31	85 to 89	508	Chronic respiratory diseases	2	1	Number	2000	602.57	749.416	471.217
1	Deaths	179	Ethiopia	3	Both	32	90 to 94	508	Chronic respiratory diseases	2	1	Number	2000	142.62	179.675	112.195
1	Deaths	179	Ethiopia	3	Both	158	<20 years	508	Chronic respiratory diseases	2	1	Number	2000	937.111	1429.55	573.231
1	Deaths	179	Ethiopia	3	Both	159	10 to 24	508	Chronic respiratory diseases	2	1	Number	2000	447.935	541.955	361.878
1	Deaths	179	Ethiopia	3	Both	169	10 to 54	508	Chronic respiratory diseases	2	1	Number	2000	2907.71	3384.49	2439.01
1	Deaths	179	Ethiopia	3	Both	235	95 plus	508	Chronic respiratory diseases	2	1	Number	2000	25.155	31.3994	19.5251
1	Deaths	179	Ethiopia	3	Both	1	Under 5	509	Chronic obstructive pulmonary disease	3	1	Number	2000	113.411	266.374	42.317
1	Deaths	179	Ethiopia	3	Both	4	Post Neonatal	509	Chronic obstructive pulmonary disease	3	1	Number	2000	0	0	0
1	Deaths	179	Ethiopia	3	Both	5	1 to 4	509	Chronic obstructive pulmonary disease	3	1	Number	2000	113.411	266.374	42.317
1	Deaths	179	Ethiopia	3	Both	6	5 to 9	509	Chronic obstructive pulmonary disease	3	1	Number	2000	19.9995	38.5433	9.44711
1	Deaths	179	Ethiopia	3	Both	7	10 to 14	509	Chronic obstructive pulmonary disease	3	1	Number	2000	11.2289	21.5497	5.13724
1	Deaths	179	Ethiopia	3	Both	8	15 to 19	509	Chronic obstructive pulmonary disease	3	1	Number	2000	35.5426	57.1865	17.5802
1	Deaths	179	Ethiopia	3	Both	9	20 to 24	509	Chronic obstructive pulmonary disease	3	1	Number	2000	52.1795	79.9343	27.6373
1	Deaths	179	Ethiopia	3	Both	10	25 to 29	509	Chronic obstructive pulmonary disease	3	1	Number	2000	57.8401	88.3138	31.662
1	Deaths	179	Ethiopia	3	Both	11	30 to 34	509	Chronic obstructive pulmonary disease	3	1	Number	2000	87.4833	132.121	50.1076
1	Deaths	179	Ethiopia	3	Both	12	35 to 39	509	Chronic obstructive pulmonary disease	3	1	Number	2000	101.798	155.364	56.6782
1	Deaths	179	Ethiopia	3	Both	13	40 to 44	509	Chronic obstructive pulmonary disease	3	1	Number	2000	156.737	233.377	90.9666
1	Deaths	179	Ethiopia	3	Both	14	45 to 49	509	Chronic obstructive pulmonary disease	3	1	Number	2000	243.163	353.425	142.572
1	Deaths	179	Ethiopia	3	Both	15	50 to 54	509	Chronic obstructive pulmonary disease	3	1	Number	2000	456.245	648.951	279.94
1	Deaths	179	Ethiopia	3	Both	16	55 to 59	509	Chronic obstructive pulmonary disease	3	1	Number	2000	801.071	1101.25	505.866
1	Deaths	179	Ethiopia	3	Both	17	60 to 64	509	Chronic obstructive pulmonary disease	3	1	Number	2000	966.898	1313.77	618.997
1	Deaths	179	Ethiopia	3	Both	18	65 to 69	509	Chronic obstructive pulmonary disease	3	1	Number	2000	1424.15	1882.64	917.14
1	Deaths	179	Ethiopia	3	Both	19	70 to 74	509	Chronic obstructive pulmonary disease	3	1	Number	2000	1510.51	2000.52	1011.51
1	Deaths	179	Ethiopia	3	Both	20	75 to 79	509	Chronic obstructive pulmonary disease	3	1	Number	2000	1378.67	1782.94	931.463
1	Deaths	179	Ethiopia	3	Both	22	All Ages	509	Chronic obstructive pulmonary disease	3	1	Number	2000	9087.96	10885.5	6689.43
1	Deaths	179	Ethiopia	3	Both	23	5-14 years	509	Chronic obstructive pulmonary disease	3	1	Number	2000	31.2284	54.7487	16.4395
1	Deaths	179	Ethiopia	3	Both	24	15-49 years	509	Chronic obstructive pulmonary disease	3	1	Number	2000	734.743	973.547	470.907
1	Deaths	179	Ethiopia	3	Both	25	50-69 years	509	Chronic obstructive pulmonary disease	3	1	Number	2000	3648.37	4615.17	2536.94
1	Deaths	179	Ethiopia	3	Both	26	70+ years	509	Chronic obstructive pulmonary disease	3	1	Number	2000	4560.21	5443.28	3334.65
1	Deaths	179	Ethiopia	3	Both	28	<1 year	509	Chronic obstructive pulmonary disease	3	1	Number	2000	0	0	0
1	Deaths	179	Ethiopia	3	Both	30	80 to 84	509	Chronic obstructive pulmonary disease	3	1	Number	2000	1052.57	1355.77	714.808
1	Deaths	179	Ethiopia	3	Both	31	85 to 89	509	Chronic obstructive pulmonary disease	3	1	Number	2000	482.292	620.991	340.08
1	Deaths	179	Ethiopia	3	Both	32	90 to 94	509	Chronic obstructive pulmonary disease	3	1	Number	2000	115.625	150.056	84.2932
1	Deaths	179	Ethiopia	3	Both	158	<20 years	509	Chronic obstructive pulmonary disease	3	1	Number	2000	180.182	345.885	95.2342
1	Deaths	179	Ethiopia	3	Both	159	10 to 24	509	Chronic obstructive pulmonary disease	3	1	Number	2000	98.951	141.711	56.194
1	Deaths	179	Ethiopia	3	Both	169	10 to 54	509	Chronic obstructive pulmonary disease	3	1	Number	2000	1202.22	1578.32	784.975
1	Deaths	179	Ethiopia	3	Both	235	95 plus	509	Chronic obstructive pulmonary disease	3	1	Number	2000	20.5472	26.4038	14.4922
1	Deaths	179	Ethiopia	3	Both	8	15 to 19	510	Pneumoconiosis	3	1	Number	2000	0.330082	0.662121	0.113588
1	Deaths	179	Ethiopia	3	Both	9	20 to 24	510	Pneumoconiosis	3	1	Number	2000	0.466482	0.86551	0.17993
1	Deaths	179	Ethiopia	3	Both	10	25 to 29	510	Pneumoconiosis	3	1	Number	2000	0.452323	0.878299	0.15528
1	Deaths	179	Ethiopia	3	Both	11	30 to 34	510	Pneumoconiosis	3	1	Number	2000	0.802341	1.67203	0.280356
1	Deaths	179	Ethiopia	3	Both	12	35 to 39	510	Pneumoconiosis	3	1	Number	2000	1.07633	2.19816	0.431474
1	Deaths	179	Ethiopia	3	Both	13	40 to 44	510	Pneumoconiosis	3	1	Number	2000	1.41278	2.70029	0.574426
1	Deaths	179	Ethiopia	3	Both	14	45 to 49	510	Pneumoconiosis	3	1	Number	2000	2.00447	4.19511	0.726481
1	Deaths	179	Ethiopia	3	Both	15	50 to 54	510	Pneumoconiosis	3	1	Number	2000	3.1248	6.21404	1.15945
1	Deaths	179	Ethiopia	3	Both	16	55 to 59	510	Pneumoconiosis	3	1	Number	2000	5.10753	9.93953	1.96661
1	Deaths	179	Ethiopia	3	Both	17	60 to 64	510	Pneumoconiosis	3	1	Number	2000	6.12602	12.885	2.42237
1	Deaths	179	Ethiopia	3	Both	18	65 to 69	510	Pneumoconiosis	3	1	Number	2000	8.35421	17.0893	3.50268
1	Deaths	179	Ethiopia	3	Both	19	70 to 74	510	Pneumoconiosis	3	1	Number	2000	8.36802	17.474	3.40864
1	Deaths	179	Ethiopia	3	Both	20	75 to 79	510	Pneumoconiosis	3	1	Number	2000	7.74938	16.4873	3.19517
1	Deaths	179	Ethiopia	3	Both	22	All Ages	510	Pneumoconiosis	3	1	Number	2000	54.1852	95.7094	27.3664
1	Deaths	179	Ethiopia	3	Both	24	15-49 years	510	Pneumoconiosis	3	1	Number	2000	6.54481	10.8904	3.03739
1	Deaths	179	Ethiopia	3	Both	25	50-69 years	510	Pneumoconiosis	3	1	Number	2000	22.7126	40.8107	10.678
1	Deaths	179	Ethiopia	3	Both	26	70+ years	510	Pneumoconiosis	3	1	Number	2000	24.9279	46.5003	11.7082
1	Deaths	179	Ethiopia	3	Both	30	80 to 84	510	Pneumoconiosis	3	1	Number	2000	5.65906	12.5646	2.24929
1	Deaths	179	Ethiopia	3	Both	31	85 to 89	510	Pneumoconiosis	3	1	Number	2000	2.4205	5.08224	0.946274
1	Deaths	179	Ethiopia	3	Both	32	90 to 94	510	Pneumoconiosis	3	1	Number	2000	0.637639	1.4055	0.248248
1	Deaths	179	Ethiopia	3	Both	158	<20 years	510	Pneumoconiosis	3	1	Number	2000	0.330082	0.662121	0.113588
1	Deaths	179	Ethiopia	3	Both	159	10 to 24	510	Pneumoconiosis	3	1	Number	2000	0.796564	1.39023	0.316851
1	Deaths	179	Ethiopia	3	Both	169	10 to 54	510	Pneumoconiosis	3	1	Number	2000	9.66961	16.2889	4.42541
1	Deaths	179	Ethiopia	3	Both	235	95 plus	510	Pneumoconiosis	3	1	Number	2000	0.0932797	0.179783	0.0409811
1	Deaths	179	Ethiopia	3	Both	8	15 to 19	511	Silicosis	4	1	Number	2000	0.017239	0.0541949	0.002633
1	Deaths	179	Ethiopia	3	Both	9	20 to 24	511	Silicosis	4	1	Number	2000	0.0253008	0.0598363	0.00490994
1	Deaths	179	Ethiopia	3	Both	10	25 to 29	511	Silicosis	4	1	Number	2000	0.0418339	0.10951	0.00657138
1	Deaths	179	Ethiopia	3	Both	11	30 to 34	511	Silicosis	4	1	Number	2000	0.111774	0.34287	0.0204494
1	Deaths	179	Ethiopia	3	Both	12	35 to 39	511	Silicosis	4	1	Number	2000	0.175186	0.452939	0.0403335
1	Deaths	179	Ethiopia	3	Both	13	40 to 44	511	Silicosis	4	1	Number	2000	0.195851	0.48586	0.0436217
1	Deaths	179	Ethiopia	3	Both	14	45 to 49	511	Silicosis	4	1	Number	2000	0.430964	1.14904	0.084418
1	Deaths	179	Ethiopia	3	Both	15	50 to 54	511	Silicosis	4	1	Number	2000	0.642754	1.68567	0.127551
1	Deaths	179	Ethiopia	3	Both	16	55 to 59	511	Silicosis	4	1	Number	2000	1.29888	3.12065	0.263442
1	Deaths	179	Ethiopia	3	Both	17	60 to 64	511	Silicosis	4	1	Number	2000	1.28853	3.2589	0.259429
1	Deaths	179	Ethiopia	3	Both	18	65 to 69	511	Silicosis	4	1	Number	2000	2.50921	5.96333	0.585308
1	Deaths	179	Ethiopia	3	Both	19	70 to 74	511	Silicosis	4	1	Number	2000	2.38623	5.80094	0.587035
1	Deaths	179	Ethiopia	3	Both	20	75 to 79	511	Silicosis	4	1	Number	2000	2.24532	5.46306	0.517333
1	Deaths	179	Ethiopia	3	Both	22	All Ages	511	Silicosis	4	1	Number	2000	13.8632	25.6687	4.21489
1	Deaths	179	Ethiopia	3	Both	24	15-49 years	511	Silicosis	4	1	Number	2000	0.998149	1.9889	0.26021
1	Deaths	179	Ethiopia	3	Both	25	50-69 years	511	Silicosis	4	1	Number	2000	5.73938	11.0308	1.63154
1	Deaths	179	Ethiopia	3	Both	26	70+ years	511	Silicosis	4	1	Number	2000	7.12566	14.4918	2.02562
1	Deaths	179	Ethiopia	3	Both	30	80 to 84	511	Silicosis	4	1	Number	2000	1.66017	3.98632	0.350157
1	Deaths	179	Ethiopia	3	Both	31	85 to 89	511	Silicosis	4	1	Number	2000	0.684243	1.64317	0.155203
1	Deaths	179	Ethiopia	3	Both	32	90 to 94	511	Silicosis	4	1	Number	2000	0.133453	0.338864	0.0275625
1	Deaths	179	Ethiopia	3	Both	158	<20 years	511	Silicosis	4	1	Number	2000	0.017239	0.0541949	0.002633
1	Deaths	179	Ethiopia	3	Both	159	10 to 24	511	Silicosis	4	1	Number	2000	0.0425398	0.0960866	0.00873289
1	Deaths	179	Ethiopia	3	Both	169	10 to 54	511	Silicosis	4	1	Number	2000	1.6409	3.36798	0.466534
1	Deaths	179	Ethiopia	3	Both	235	95 plus	511	Silicosis	4	1	Number	2000	0.0162526	0.0389392	0.00351917
1	Deaths	179	Ethiopia	3	Both	8	15 to 19	512	Asbestosis	4	1	Number	2000	0.153626	0.317679	0.0526322
1	Deaths	179	Ethiopia	3	Both	9	20 to 24	512	Asbestosis	4	1	Number	2000	0.215339	0.41249	0.0809127
1	Deaths	179	Ethiopia	3	Both	10	25 to 29	512	Asbestosis	4	1	Number	2000	0.170787	0.356579	0.0620747
1	Deaths	179	Ethiopia	3	Both	11	30 to 34	512	Asbestosis	4	1	Number	2000	0.22683	0.549106	0.0732669
1	Deaths	179	Ethiopia	3	Both	12	35 to 39	512	Asbestosis	4	1	Number	2000	0.231725	0.560705	0.0770598
1	Deaths	179	Ethiopia	3	Both	13	40 to 44	512	Asbestosis	4	1	Number	2000	0.257744	0.606122	0.080239
1	Deaths	179	Ethiopia	3	Both	14	45 to 49	512	Asbestosis	4	1	Number	2000	0.318474	0.838866	0.0834956
1	Deaths	179	Ethiopia	3	Both	15	50 to 54	512	Asbestosis	4	1	Number	2000	0.529347	1.5523	0.100168
1	Deaths	179	Ethiopia	3	Both	16	55 to 59	512	Asbestosis	4	1	Number	2000	0.839892	2.53541	0.147699
1	Deaths	179	Ethiopia	3	Both	17	60 to 64	512	Asbestosis	4	1	Number	2000	1.06575	3.59951	0.165784
1	Deaths	179	Ethiopia	3	Both	18	65 to 69	512	Asbestosis	4	1	Number	2000	1.20897	4.18836	0.204361
1	Deaths	179	Ethiopia	3	Both	19	70 to 74	512	Asbestosis	4	1	Number	2000	1.20722	3.82023	0.205891
1	Deaths	179	Ethiopia	3	Both	20	75 to 79	512	Asbestosis	4	1	Number	2000	0.980026	3.46087	0.168273
1	Deaths	179	Ethiopia	3	Both	22	All Ages	512	Asbestosis	4	1	Number	2000	8.57776	20.8049	2.82679
1	Deaths	179	Ethiopia	3	Both	24	15-49 years	512	Asbestosis	4	1	Number	2000	1.57453	3.04345	0.760637
1	Deaths	179	Ethiopia	3	Both	25	50-69 years	512	Asbestosis	4	1	Number	2000	3.64395	9.76727	0.810471
1	Deaths	179	Ethiopia	3	Both	26	70+ years	512	Asbestosis	4	1	Number	2000	3.35929	9.00837	0.755813
1	Deaths	179	Ethiopia	3	Both	30	80 to 84	512	Asbestosis	4	1	Number	2000	0.759254	2.40406	0.128335
1	Deaths	179	Ethiopia	3	Both	31	85 to 89	512	Asbestosis	4	1	Number	2000	0.314523	1.09758	0.0507848
1	Deaths	179	Ethiopia	3	Both	32	90 to 94	512	Asbestosis	4	1	Number	2000	0.0897647	0.322487	0.0147625
1	Deaths	179	Ethiopia	3	Both	158	<20 years	512	Asbestosis	4	1	Number	2000	0.153626	0.317679	0.0526322
1	Deaths	179	Ethiopia	3	Both	159	10 to 24	512	Asbestosis	4	1	Number	2000	0.368966	0.653855	0.151811
1	Deaths	179	Ethiopia	3	Both	169	10 to 54	512	Asbestosis	4	1	Number	2000	2.10387	4.35414	0.926994
1	Deaths	179	Ethiopia	3	Both	235	95 plus	512	Asbestosis	4	1	Number	2000	0.00849727	0.0292509	0.00146634
1	Deaths	179	Ethiopia	3	Both	8	15 to 19	513	Coal workers pneumoconiosis	4	1	Number	2000	0.00819614	0.0232732	0.00143787
1	Deaths	179	Ethiopia	3	Both	9	20 to 24	513	Coal workers pneumoconiosis	4	1	Number	2000	0.0185581	0.0656036	0.00228989
1	Deaths	179	Ethiopia	3	Both	10	25 to 29	513	Coal workers pneumoconiosis	4	1	Number	2000	0.0307615	0.095064	0.00396688
1	Deaths	179	Ethiopia	3	Both	11	30 to 34	513	Coal workers pneumoconiosis	4	1	Number	2000	0.0450317	0.147053	0.00585411
1	Deaths	179	Ethiopia	3	Both	12	35 to 39	513	Coal workers pneumoconiosis	4	1	Number	2000	0.103442	0.30554	0.0151421
1	Deaths	179	Ethiopia	3	Both	13	40 to 44	513	Coal workers pneumoconiosis	4	1	Number	2000	0.171587	0.551484	0.0272571
1	Deaths	179	Ethiopia	3	Both	14	45 to 49	513	Coal workers pneumoconiosis	4	1	Number	2000	0.299667	0.932879	0.0456131
1	Deaths	179	Ethiopia	3	Both	15	50 to 54	513	Coal workers pneumoconiosis	4	1	Number	2000	0.58474	1.56997	0.0871205
1	Deaths	179	Ethiopia	3	Both	16	55 to 59	513	Coal workers pneumoconiosis	4	1	Number	2000	0.746564	2.11958	0.122871
1	Deaths	179	Ethiopia	3	Both	17	60 to 64	513	Coal workers pneumoconiosis	4	1	Number	2000	0.883032	2.39323	0.148531
1	Deaths	179	Ethiopia	3	Both	18	65 to 69	513	Coal workers pneumoconiosis	4	1	Number	2000	1.15929	3.25789	0.195808
1	Deaths	179	Ethiopia	3	Both	19	70 to 74	513	Coal workers pneumoconiosis	4	1	Number	2000	0.985798	2.87058	0.192768
1	Deaths	179	Ethiopia	3	Both	20	75 to 79	513	Coal workers pneumoconiosis	4	1	Number	2000	0.849826	2.33288	0.179841
1	Deaths	179	Ethiopia	3	Both	22	All Ages	513	Coal workers pneumoconiosis	4	1	Number	2000	6.87053	13.5499	2.16858
1	Deaths	179	Ethiopia	3	Both	24	15-49 years	513	Coal workers pneumoconiosis	4	1	Number	2000	0.677244	1.71203	0.157158
1	Deaths	179	Ethiopia	3	Both	25	50-69 years	513	Coal workers pneumoconiosis	4	1	Number	2000	3.37363	7.39496	0.850047
1	Deaths	179	Ethiopia	3	Both	26	70+ years	513	Coal workers pneumoconiosis	4	1	Number	2000	2.81966	6.54475	0.891426
1	Deaths	179	Ethiopia	3	Both	30	80 to 84	513	Coal workers pneumoconiosis	4	1	Number	2000	0.679677	2.15142	0.125155
1	Deaths	179	Ethiopia	3	Both	31	85 to 89	513	Coal workers pneumoconiosis	4	1	Number	2000	0.238341	0.736187	0.0472177
1	Deaths	179	Ethiopia	3	Both	32	90 to 94	513	Coal workers pneumoconiosis	4	1	Number	2000	0.0573134	0.181641	0.0108029
1	Deaths	179	Ethiopia	3	Both	158	<20 years	513	Coal workers pneumoconiosis	4	1	Number	2000	0.00819614	0.0232732	0.00143787
1	Deaths	179	Ethiopia	3	Both	159	10 to 24	513	Coal workers pneumoconiosis	4	1	Number	2000	0.0267542	0.0791824	0.00464001
1	Deaths	179	Ethiopia	3	Both	169	10 to 54	513	Coal workers pneumoconiosis	4	1	Number	2000	1.26198	2.92594	0.310563
1	Deaths	179	Ethiopia	3	Both	235	95 plus	513	Coal workers pneumoconiosis	4	1	Number	2000	0.00870356	0.0290761	0.00131417
1	Deaths	179	Ethiopia	3	Both	8	15 to 19	514	Other pneumoconiosis	4	1	Number	2000	0.151021	0.303752	0.0513137
1	Deaths	179	Ethiopia	3	Both	9	20 to 24	514	Other pneumoconiosis	4	1	Number	2000	0.207284	0.405341	0.0732562
1	Deaths	179	Ethiopia	3	Both	10	25 to 29	514	Other pneumoconiosis	4	1	Number	2000	0.208941	0.451042	0.0665574
1	Deaths	179	Ethiopia	3	Both	11	30 to 34	514	Other pneumoconiosis	4	1	Number	2000	0.418706	0.9194	0.129739
1	Deaths	179	Ethiopia	3	Both	12	35 to 39	514	Other pneumoconiosis	4	1	Number	2000	0.565979	1.2657	0.173313
1	Deaths	179	Ethiopia	3	Both	13	40 to 44	514	Other pneumoconiosis	4	1	Number	2000	0.7876	1.58472	0.258283
1	Deaths	179	Ethiopia	3	Both	14	45 to 49	514	Other pneumoconiosis	4	1	Number	2000	0.955364	2.26199	0.264578
1	Deaths	179	Ethiopia	3	Both	15	50 to 54	514	Other pneumoconiosis	4	1	Number	2000	1.36796	3.18671	0.393147
1	Deaths	179	Ethiopia	3	Both	16	55 to 59	514	Other pneumoconiosis	4	1	Number	2000	2.22219	4.98283	0.65126
1	Deaths	179	Ethiopia	3	Both	17	60 to 64	514	Other pneumoconiosis	4	1	Number	2000	2.8887	6.54314	0.9033
1	Deaths	179	Ethiopia	3	Both	18	65 to 69	514	Other pneumoconiosis	4	1	Number	2000	3.47674	8.28618	1.05583
1	Deaths	179	Ethiopia	3	Both	19	70 to 74	514	Other pneumoconiosis	4	1	Number	2000	3.78877	8.79895	1.20436
1	Deaths	179	Ethiopia	3	Both	20	75 to 79	514	Other pneumoconiosis	4	1	Number	2000	3.67421	8.90267	1.11118
1	Deaths	179	Ethiopia	3	Both	22	All Ages	514	Other pneumoconiosis	4	1	Number	2000	24.8738	49.225	10.8374
1	Deaths	179	Ethiopia	3	Both	24	15-49 years	514	Other pneumoconiosis	4	1	Number	2000	3.29489	5.96931	1.29408
1	Deaths	179	Ethiopia	3	Both	25	50-69 years	514	Other pneumoconiosis	4	1	Number	2000	9.9556	21.4411	3.97702
1	Deaths	179	Ethiopia	3	Both	26	70+ years	514	Other pneumoconiosis	4	1	Number	2000	11.6233	24.316	4.66397
1	Deaths	179	Ethiopia	3	Both	30	80 to 84	514	Other pneumoconiosis	4	1	Number	2000	2.55995	6.67003	0.751321
1	Deaths	179	Ethiopia	3	Both	31	85 to 89	514	Other pneumoconiosis	4	1	Number	2000	1.1834	2.99769	0.348906
1	Deaths	179	Ethiopia	3	Both	32	90 to 94	514	Other pneumoconiosis	4	1	Number	2000	0.357108	0.94321	0.109818
1	Deaths	179	Ethiopia	3	Both	158	<20 years	514	Other pneumoconiosis	4	1	Number	2000	0.151021	0.303752	0.0513137
1	Deaths	179	Ethiopia	3	Both	159	10 to 24	514	Other pneumoconiosis	4	1	Number	2000	0.358304	0.635258	0.141015
1	Deaths	179	Ethiopia	3	Both	169	10 to 54	514	Other pneumoconiosis	4	1	Number	2000	4.66286	8.55801	1.80961
1	Deaths	179	Ethiopia	3	Both	235	95 plus	514	Other pneumoconiosis	4	1	Number	2000	0.0598263	0.12851	0.0206093
1	Deaths	179	Ethiopia	3	Both	1	Under 5	515	Asthma	3	1	Number	2000	387.082	712.546	148.782
1	Deaths	179	Ethiopia	3	Both	5	1 to 4	515	Asthma	3	1	Number	2000	387.082	712.546	148.782
1	Deaths	179	Ethiopia	3	Both	6	5 to 9	515	Asthma	3	1	Number	2000	92.371	142.218	53.8118
1	Deaths	179	Ethiopia	3	Both	7	10 to 14	515	Asthma	3	1	Number	2000	96.2723	143.007	62.5051
1	Deaths	179	Ethiopia	3	Both	8	15 to 19	515	Asthma	3	1	Number	2000	101.972	141.829	69.1272
1	Deaths	179	Ethiopia	3	Both	9	20 to 24	515	Asthma	3	1	Number	2000	124.726	170.791	87.335
1	Deaths	179	Ethiopia	3	Both	10	25 to 29	515	Asthma	3	1	Number	2000	118.282	165.191	78.7389
1	Deaths	179	Ethiopia	3	Both	11	30 to 34	515	Asthma	3	1	Number	2000	127.672	177.555	79.6214
1	Deaths	179	Ethiopia	3	Both	12	35 to 39	515	Asthma	3	1	Number	2000	166.809	231.791	100.4
1	Deaths	179	Ethiopia	3	Both	13	40 to 44	515	Asthma	3	1	Number	2000	223.616	314.066	139.074
1	Deaths	179	Ethiopia	3	Both	14	45 to 49	515	Asthma	3	1	Number	2000	264.142	388.258	161.177
1	Deaths	179	Ethiopia	3	Both	15	50 to 54	515	Asthma	3	1	Number	2000	363.79	556.613	203.279
1	Deaths	179	Ethiopia	3	Both	16	55 to 59	515	Asthma	3	1	Number	2000	511.047	795.041	296.783
1	Deaths	179	Ethiopia	3	Both	17	60 to 64	515	Asthma	3	1	Number	2000	461.915	752.806	253.978
1	Deaths	179	Ethiopia	3	Both	18	65 to 69	515	Asthma	3	1	Number	2000	558.972	913.45	305.387
1	Deaths	179	Ethiopia	3	Both	19	70 to 74	515	Asthma	3	1	Number	2000	513.531	893.017	276.432
1	Deaths	179	Ethiopia	3	Both	20	75 to 79	515	Asthma	3	1	Number	2000	437.464	761.113	237.098
1	Deaths	179	Ethiopia	3	Both	22	All Ages	515	Asthma	3	1	Number	2000	4957.17	6964.84	3429.14
1	Deaths	179	Ethiopia	3	Both	23	5-14 years	515	Asthma	3	1	Number	2000	188.643	263.82	124.489
1	Deaths	179	Ethiopia	3	Both	24	15-49 years	515	Asthma	3	1	Number	2000	1127.22	1437.85	795.882
1	Deaths	179	Ethiopia	3	Both	25	50-69 years	515	Asthma	3	1	Number	2000	1895.72	2767.84	1235.93
1	Deaths	179	Ethiopia	3	Both	26	70+ years	515	Asthma	3	1	Number	2000	1358.5	2248.4	831.654
1	Deaths	179	Ethiopia	3	Both	30	80 to 84	515	Asthma	3	1	Number	2000	269.964	490.956	144.078
1	Deaths	179	Ethiopia	3	Both	31	85 to 89	515	Asthma	3	1	Number	2000	109.321	209.785	58.049
1	Deaths	179	Ethiopia	3	Both	32	90 to 94	515	Asthma	3	1	Number	2000	24.0476	45.0233	12.5703
1	Deaths	179	Ethiopia	3	Both	158	<20 years	515	Asthma	3	1	Number	2000	677.698	1037.32	388.005
1	Deaths	179	Ethiopia	3	Both	159	10 to 24	515	Asthma	3	1	Number	2000	322.971	402.269	248.715
1	Deaths	179	Ethiopia	3	Both	169	10 to 54	515	Asthma	3	1	Number	2000	1587.28	2041.75	1136.57
1	Deaths	179	Ethiopia	3	Both	235	95 plus	515	Asthma	3	1	Number	2000	4.17211	8.03046	1.98526
1	Deaths	179	Ethiopia	3	Both	1	Under 5	516	Interstitial lung disease and pulmonary sarcoidosis	3	1	Number	2000	3.28829	16.456	0.186734
1	Deaths	179	Ethiopia	3	Both	5	1 to 4	516	Interstitial lung disease and pulmonary sarcoidosis	3	1	Number	2000	3.28829	16.456	0.186734
1	Deaths	179	Ethiopia	3	Both	6	5 to 9	516	Interstitial lung disease and pulmonary sarcoidosis	3	1	Number	2000	1.09239	3.75575	0.249597
1	Deaths	179	Ethiopia	3	Both	7	10 to 14	516	Interstitial lung disease and pulmonary sarcoidosis	3	1	Number	2000	0.526646	1.68695	0.168441
1	Deaths	179	Ethiopia	3	Both	8	15 to 19	516	Interstitial lung disease and pulmonary sarcoidosis	3	1	Number	2000	0.760158	2.20258	0.170339
1	Deaths	179	Ethiopia	3	Both	9	20 to 24	516	Interstitial lung disease and pulmonary sarcoidosis	3	1	Number	2000	1.10476	3.3746	0.207486
1	Deaths	179	Ethiopia	3	Both	10	25 to 29	516	Interstitial lung disease and pulmonary sarcoidosis	3	1	Number	2000	1.15289	3.49921	0.19864
1	Deaths	179	Ethiopia	3	Both	11	30 to 34	516	Interstitial lung disease and pulmonary sarcoidosis	3	1	Number	2000	1.7844	5.37463	0.309045
1	Deaths	179	Ethiopia	3	Both	12	35 to 39	516	Interstitial lung disease and pulmonary sarcoidosis	3	1	Number	2000	2.29224	6.99105	0.416961
1	Deaths	179	Ethiopia	3	Both	13	40 to 44	516	Interstitial lung disease and pulmonary sarcoidosis	3	1	Number	2000	3.30869	9.83407	0.557586
1	Deaths	179	Ethiopia	3	Both	14	45 to 49	516	Interstitial lung disease and pulmonary sarcoidosis	3	1	Number	2000	4.44301	12.8117	0.779709
1	Deaths	179	Ethiopia	3	Both	15	50 to 54	516	Interstitial lung disease and pulmonary sarcoidosis	3	1	Number	2000	7.13607	19.808	1.28143
1	Deaths	179	Ethiopia	3	Both	16	55 to 59	516	Interstitial lung disease and pulmonary sarcoidosis	3	1	Number	2000	11.1254	31.5627	1.99981
1	Deaths	179	Ethiopia	3	Both	17	60 to 64	516	Interstitial lung disease and pulmonary sarcoidosis	3	1	Number	2000	11.1414	27.5627	1.94134
1	Deaths	179	Ethiopia	3	Both	18	65 to 69	516	Interstitial lung disease and pulmonary sarcoidosis	3	1	Number	2000	15.2369	39.4657	2.66912
1	Deaths	179	Ethiopia	3	Both	19	70 to 74	516	Interstitial lung disease and pulmonary sarcoidosis	3	1	Number	2000	14.7724	37.0876	2.5353
1	Deaths	179	Ethiopia	3	Both	20	75 to 79	516	Interstitial lung disease and pulmonary sarcoidosis	3	1	Number	2000	12.5233	30.4162	2.14647
1	Deaths	179	Ethiopia	3	Both	22	All Ages	516	Interstitial lung disease and pulmonary sarcoidosis	3	1	Number	2000	104.914	261.38	19.3525
1	Deaths	179	Ethiopia	3	Both	23	5-14 years	516	Interstitial lung disease and pulmonary sarcoidosis	3	1	Number	2000	1.61904	5.20297	0.472797
1	Deaths	179	Ethiopia	3	Both	24	15-49 years	516	Interstitial lung disease and pulmonary sarcoidosis	3	1	Number	2000	14.8461	41.256	2.85203
1	Deaths	179	Ethiopia	3	Both	25	50-69 years	516	Interstitial lung disease and pulmonary sarcoidosis	3	1	Number	2000	44.6397	112.999	8.29792
1	Deaths	179	Ethiopia	3	Both	14	45 to 49	390	Dietary iron deficiency	3	1	Number	2000	2.65488	8.34951	1.37192
1	Deaths	179	Ethiopia	3	Both	15	50 to 54	390	Dietary iron deficiency	3	1	Number	2000	3.61485	17.1114	1.38092
1	Deaths	179	Ethiopia	3	Both	16	55 to 59	390	Dietary iron deficiency	3	1	Number	2000	1.75556	6.35458	0.838383
1	Deaths	179	Ethiopia	3	Both	17	60 to 64	390	Dietary iron deficiency	3	1	Number	2000	0.886065	2.74217	0.419179
1	Deaths	179	Ethiopia	3	Both	18	65 to 69	390	Dietary iron deficiency	3	1	Number	2000	0.954519	3.65517	0.439393
1	Deaths	179	Ethiopia	3	Both	19	70 to 74	390	Dietary iron deficiency	3	1	Number	2000	0.573888	2.64257	0.188966
1	Deaths	179	Ethiopia	3	Both	20	75 to 79	390	Dietary iron deficiency	3	1	Number	2000	0.91371	5.66069	0.139251
1	Deaths	179	Ethiopia	3	Both	22	All Ages	390	Dietary iron deficiency	3	1	Number	2000	38.313	85.1289	26.2894
1	Deaths	179	Ethiopia	3	Both	23	5-14 years	390	Dietary iron deficiency	3	1	Number	2000	1.66856	2.64618	0.973336
1	Deaths	179	Ethiopia	3	Both	24	15-49 years	390	Dietary iron deficiency	3	1	Number	2000	25.158	37.1839	18.5826
1	Deaths	179	Ethiopia	3	Both	25	50-69 years	390	Dietary iron deficiency	3	1	Number	2000	7.211	29.907	3.73837
1	Deaths	179	Ethiopia	3	Both	26	70+ years	390	Dietary iron deficiency	3	1	Number	2000	3.43566	14.8751	0.673104
1	Deaths	179	Ethiopia	3	Both	28	<1 year	390	Dietary iron deficiency	3	1	Number	2000	0.175243	0.458731	0.0880269
1	Deaths	179	Ethiopia	3	Both	30	80 to 84	390	Dietary iron deficiency	3	1	Number	2000	1.27216	6.72823	0.112692
1	Deaths	179	Ethiopia	3	Both	31	85 to 89	390	Dietary iron deficiency	3	1	Number	2000	0.376366	2.20319	0.0369381
1	Deaths	179	Ethiopia	3	Both	32	90 to 94	390	Dietary iron deficiency	3	1	Number	2000	0.167218	1.05383	0.0104569
1	Deaths	179	Ethiopia	3	Both	158	<20 years	390	Dietary iron deficiency	3	1	Number	2000	6.45325	9.08027	4.25491
1	Deaths	179	Ethiopia	3	Both	159	10 to 24	390	Dietary iron deficiency	3	1	Number	2000	10.9305	16.132	7.21912
1	Deaths	179	Ethiopia	3	Both	169	10 to 54	390	Dietary iron deficiency	3	1	Number	2000	29.6505	55.2145	21.0307
1	Deaths	179	Ethiopia	3	Both	235	95 plus	390	Dietary iron deficiency	3	1	Number	2000	0.132318	0.850304	0.00356533
1	Deaths	179	Ethiopia	3	Both	1	Under 5	391	Other nutritional deficiencies	3	1	Number	2000	244.719	665.147	45.4085
1	Deaths	179	Ethiopia	3	Both	4	Post Neonatal	391	Other nutritional deficiencies	3	1	Number	2000	65.6351	160.006	16.0785
1	Deaths	179	Ethiopia	3	Both	5	1 to 4	391	Other nutritional deficiencies	3	1	Number	2000	179.084	552.17	16.2484
1	Deaths	179	Ethiopia	3	Both	6	5 to 9	391	Other nutritional deficiencies	3	1	Number	2000	26.6809	69.4693	7.95658
1	Deaths	179	Ethiopia	3	Both	7	10 to 14	391	Other nutritional deficiencies	3	1	Number	2000	20.2232	51.4436	5.90507
1	Deaths	179	Ethiopia	3	Both	8	15 to 19	391	Other nutritional deficiencies	3	1	Number	2000	54.9301	96.7143	26.513
1	Deaths	179	Ethiopia	3	Both	9	20 to 24	391	Other nutritional deficiencies	3	1	Number	2000	108.006	184.128	56.7032
1	Deaths	179	Ethiopia	3	Both	10	25 to 29	391	Other nutritional deficiencies	3	1	Number	2000	89.4644	156.771	42.8719
1	Deaths	179	Ethiopia	3	Both	11	30 to 34	391	Other nutritional deficiencies	3	1	Number	2000	110.578	180.362	58.2838
1	Deaths	179	Ethiopia	3	Both	12	35 to 39	391	Other nutritional deficiencies	3	1	Number	2000	102.144	165.795	51.6009
1	Deaths	179	Ethiopia	3	Both	13	40 to 44	391	Other nutritional deficiencies	3	1	Number	2000	95.0977	155.817	47.059
1	Deaths	179	Ethiopia	3	Both	14	45 to 49	391	Other nutritional deficiencies	3	1	Number	2000	180.118	280.609	101.554
1	Deaths	179	Ethiopia	3	Both	15	50 to 54	391	Other nutritional deficiencies	3	1	Number	2000	235.42	380.887	118.613
1	Deaths	179	Ethiopia	3	Both	16	55 to 59	391	Other nutritional deficiencies	3	1	Number	2000	185.467	304.822	91.1306
1	Deaths	179	Ethiopia	3	Both	17	60 to 64	391	Other nutritional deficiencies	3	1	Number	2000	155.874	270.477	76.8534
1	Deaths	179	Ethiopia	3	Both	18	65 to 69	391	Other nutritional deficiencies	3	1	Number	2000	208.951	375.586	101.19
1	Deaths	179	Ethiopia	3	Both	19	70 to 74	391	Other nutritional deficiencies	3	1	Number	2000	171.214	317.701	79.6717
1	Deaths	179	Ethiopia	3	Both	20	75 to 79	391	Other nutritional deficiencies	3	1	Number	2000	181.564	332.809	82.6672
1	Deaths	179	Ethiopia	3	Both	22	All Ages	391	Other nutritional deficiencies	3	1	Number	2000	2555.84	3469.61	1690.07
1	Deaths	179	Ethiopia	3	Both	23	5-14 years	391	Other nutritional deficiencies	3	1	Number	2000	46.9041	100.19	18.21
1	Deaths	179	Ethiopia	3	Both	24	15-49 years	391	Other nutritional deficiencies	3	1	Number	2000	740.337	993.654	494.185
1	Deaths	179	Ethiopia	3	Both	25	50-69 years	391	Other nutritional deficiencies	3	1	Number	2000	785.713	1129.46	478.114
1	Deaths	179	Ethiopia	3	Both	26	70+ years	391	Other nutritional deficiencies	3	1	Number	2000	738.169	1187.1	421.918
1	Deaths	179	Ethiopia	3	Both	28	<1 year	391	Other nutritional deficiencies	3	1	Number	2000	65.6351	160.006	16.0785
1	Deaths	179	Ethiopia	3	Both	30	80 to 84	391	Other nutritional deficiencies	3	1	Number	2000	194.598	356.052	97.1257
1	Deaths	179	Ethiopia	3	Both	31	85 to 89	391	Other nutritional deficiencies	3	1	Number	2000	131.217	242.424	60.6067
1	Deaths	179	Ethiopia	3	Both	32	90 to 94	391	Other nutritional deficiencies	3	1	Number	2000	50.7928	96.1918	21.1129
1	Deaths	179	Ethiopia	3	Both	158	<20 years	391	Other nutritional deficiencies	3	1	Number	2000	346.553	804.3	121.78
1	Deaths	179	Ethiopia	3	Both	159	10 to 24	391	Other nutritional deficiencies	3	1	Number	2000	183.159	277.874	107.052
1	Deaths	179	Ethiopia	3	Both	169	10 to 54	391	Other nutritional deficiencies	3	1	Number	2000	995.981	1323.3	660.823
1	Deaths	179	Ethiopia	3	Both	235	95 plus	391	Other nutritional deficiencies	3	1	Number	2000	8.78318	15.3488	4.08844
1	Deaths	179	Ethiopia	3	Both	1	Under 5	392	Other communicable, maternal, neonatal, and nutritional diseases	2	1	Number	2000	10828.2	17261.7	6319.13
1	Deaths	179	Ethiopia	3	Both	2	Early Neonatal	392	Other communicable, maternal, neonatal, and nutritional diseases	2	1	Number	2000	3015.61	5092.69	1627.79
1	Deaths	179	Ethiopia	3	Both	3	Late Neonatal	392	Other communicable, maternal, neonatal, and nutritional diseases	2	1	Number	2000	1555.44	2834.6	813.22
1	Deaths	179	Ethiopia	3	Both	4	Post Neonatal	392	Other communicable, maternal, neonatal, and nutritional diseases	2	1	Number	2000	3721.87	6543.47	1976.17
1	Deaths	179	Ethiopia	3	Both	5	1 to 4	392	Other communicable, maternal, neonatal, and nutritional diseases	2	1	Number	2000	2535.32	4509.77	1310.87
1	Deaths	179	Ethiopia	3	Both	6	5 to 9	392	Other communicable, maternal, neonatal, and nutritional diseases	2	1	Number	2000	653.535	1079.48	359.569
1	Deaths	179	Ethiopia	3	Both	7	10 to 14	392	Other communicable, maternal, neonatal, and nutritional diseases	2	1	Number	2000	141.106	204.116	90.9956
1	Deaths	179	Ethiopia	3	Both	8	15 to 19	392	Other communicable, maternal, neonatal, and nutritional diseases	2	1	Number	2000	215.164	322.092	148.494
1	Deaths	179	Ethiopia	3	Both	9	20 to 24	392	Other communicable, maternal, neonatal, and nutritional diseases	2	1	Number	2000	323.977	442.86	226.129
1	Deaths	179	Ethiopia	3	Both	10	25 to 29	392	Other communicable, maternal, neonatal, and nutritional diseases	2	1	Number	2000	273.077	386.034	192.935
1	Deaths	179	Ethiopia	3	Both	11	30 to 34	392	Other communicable, maternal, neonatal, and nutritional diseases	2	1	Number	2000	233.25	337.807	163.825
1	Deaths	179	Ethiopia	3	Both	12	35 to 39	392	Other communicable, maternal, neonatal, and nutritional diseases	2	1	Number	2000	216.602	302.041	147.618
1	Deaths	179	Ethiopia	3	Both	13	40 to 44	392	Other communicable, maternal, neonatal, and nutritional diseases	2	1	Number	2000	197.703	324.751	115.606
1	Deaths	179	Ethiopia	3	Both	14	45 to 49	392	Other communicable, maternal, neonatal, and nutritional diseases	2	1	Number	2000	241.889	386.765	149.245
1	Deaths	179	Ethiopia	3	Both	15	50 to 54	392	Other communicable, maternal, neonatal, and nutritional diseases	2	1	Number	2000	196.284	272.6	141.39
1	Deaths	179	Ethiopia	3	Both	16	55 to 59	392	Other communicable, maternal, neonatal, and nutritional diseases	2	1	Number	2000	343.858	474.952	252.545
1	Deaths	179	Ethiopia	3	Both	17	60 to 64	392	Other communicable, maternal, neonatal, and nutritional diseases	2	1	Number	2000	210.331	287.979	148.508
1	Deaths	179	Ethiopia	3	Both	18	65 to 69	392	Other communicable, maternal, neonatal, and nutritional diseases	2	1	Number	2000	263.17	370.943	187.217
1	Deaths	179	Ethiopia	3	Both	19	70 to 74	392	Other communicable, maternal, neonatal, and nutritional diseases	2	1	Number	2000	204.283	286.694	143.872
1	Deaths	179	Ethiopia	3	Both	20	75 to 79	392	Other communicable, maternal, neonatal, and nutritional diseases	2	1	Number	2000	199.07	274.411	143.866
1	Deaths	179	Ethiopia	3	Both	22	All Ages	392	Other communicable, maternal, neonatal, and nutritional diseases	2	1	Number	2000	14966.2	21785.1	10151.7
1	Deaths	179	Ethiopia	3	Both	23	5-14 years	392	Other communicable, maternal, neonatal, and nutritional diseases	2	1	Number	2000	794.64	1230.26	473.558
1	Deaths	179	Ethiopia	3	Both	24	15-49 years	392	Other communicable, maternal, neonatal, and nutritional diseases	2	1	Number	2000	1701.66	2059.76	1392.68
1	Deaths	179	Ethiopia	3	Both	25	50-69 years	392	Other communicable, maternal, neonatal, and nutritional diseases	2	1	Number	2000	1013.64	1246.3	817.798
1	Deaths	179	Ethiopia	3	Both	26	70+ years	392	Other communicable, maternal, neonatal, and nutritional diseases	2	1	Number	2000	628.034	758.73	504.152
1	Deaths	179	Ethiopia	3	Both	28	<1 year	392	Other communicable, maternal, neonatal, and nutritional diseases	2	1	Number	2000	8292.92	13719.1	4841.69
1	Deaths	179	Ethiopia	3	Both	30	80 to 84	392	Other communicable, maternal, neonatal, and nutritional diseases	2	1	Number	2000	141.997	195.628	97.9
1	Deaths	179	Ethiopia	3	Both	31	85 to 89	392	Other communicable, maternal, neonatal, and nutritional diseases	2	1	Number	2000	60.6348	85.0922	41.4062
1	Deaths	179	Ethiopia	3	Both	32	90 to 94	392	Other communicable, maternal, neonatal, and nutritional diseases	2	1	Number	2000	18.1309	24.3593	12.8932
1	Deaths	179	Ethiopia	3	Both	158	<20 years	392	Other communicable, maternal, neonatal, and nutritional diseases	2	1	Number	2000	11838	18605.9	7041.28
1	Deaths	179	Ethiopia	3	Both	159	10 to 24	392	Other communicable, maternal, neonatal, and nutritional diseases	2	1	Number	2000	680.247	856.057	528.62
1	Deaths	179	Ethiopia	3	Both	169	10 to 54	392	Other communicable, maternal, neonatal, and nutritional diseases	2	1	Number	2000	2039.05	2416.22	1697.8
1	Deaths	179	Ethiopia	3	Both	235	95 plus	392	Other communicable, maternal, neonatal, and nutritional diseases	2	1	Number	2000	3.9187	5.1935	2.6226
1	Deaths	179	Ethiopia	3	Both	1	Under 5	393	Sexually transmitted diseases excluding HIV	3	1	Number	2000	8233.66	13674	4446.53
1	Deaths	179	Ethiopia	3	Both	2	Early Neonatal	393	Sexually transmitted diseases excluding HIV	3	1	Number	2000	2590.5	4334.61	1389.09
1	Deaths	179	Ethiopia	3	Both	3	Late Neonatal	393	Sexually transmitted diseases excluding HIV	3	1	Number	2000	1095.65	1842.29	571.97
1	Deaths	179	Ethiopia	3	Both	4	Post Neonatal	393	Sexually transmitted diseases excluding HIV	3	1	Number	2000	2854.9	4866.69	1441.32
1	Deaths	179	Ethiopia	3	Both	5	1 to 4	393	Sexually transmitted diseases excluding HIV	3	1	Number	2000	1692.61	2993.76	791.388
1	Deaths	179	Ethiopia	3	Both	6	5 to 9	393	Sexually transmitted diseases excluding HIV	3	1	Number	2000	549.156	954.349	269.604
1	Deaths	179	Ethiopia	3	Both	7	10 to 14	393	Sexually transmitted diseases excluding HIV	3	1	Number	2000	11.8759	24.1744	5.04036
1	Deaths	179	Ethiopia	3	Both	8	15 to 19	393	Sexually transmitted diseases excluding HIV	3	1	Number	2000	62.762	123.411	29.0452
1	Deaths	179	Ethiopia	3	Both	9	20 to 24	393	Sexually transmitted diseases excluding HIV	3	1	Number	2000	52.0267	84.0117	29.015
1	Deaths	179	Ethiopia	3	Both	10	25 to 29	393	Sexually transmitted diseases excluding HIV	3	1	Number	2000	57.8916	92.8162	31.1991
1	Deaths	179	Ethiopia	3	Both	11	30 to 34	393	Sexually transmitted diseases excluding HIV	3	1	Number	2000	57.872	94.1063	32.8412
1	Deaths	179	Ethiopia	3	Both	12	35 to 39	393	Sexually transmitted diseases excluding HIV	3	1	Number	2000	40.2099	61.7449	23.8411
1	Deaths	179	Ethiopia	3	Both	13	40 to 44	393	Sexually transmitted diseases excluding HIV	3	1	Number	2000	17.5417	28.6966	10.2365
1	Deaths	179	Ethiopia	3	Both	14	45 to 49	393	Sexually transmitted diseases excluding HIV	3	1	Number	2000	28.1324	43.5785	17.1844
1	Deaths	179	Ethiopia	3	Both	15	50 to 54	393	Sexually transmitted diseases excluding HIV	3	1	Number	2000	40.9922	69.0753	24.3226
1	Deaths	179	Ethiopia	3	Both	16	55 to 59	393	Sexually transmitted diseases excluding HIV	3	1	Number	2000	72.8806	117.256	43.0009
1	Deaths	179	Ethiopia	3	Both	17	60 to 64	393	Sexually transmitted diseases excluding HIV	3	1	Number	2000	15.3295	25.1989	8.59678
1	Deaths	179	Ethiopia	3	Both	18	65 to 69	393	Sexually transmitted diseases excluding HIV	3	1	Number	2000	2.46788	4.03879	1.42452
1	Deaths	179	Ethiopia	3	Both	19	70 to 74	393	Sexually transmitted diseases excluding HIV	3	1	Number	2000	1.42146	2.45009	0.769276
1	Deaths	179	Ethiopia	3	Both	20	75 to 79	393	Sexually transmitted diseases excluding HIV	3	1	Number	2000	18.924	30.1669	11.1945
1	Deaths	179	Ethiopia	3	Both	22	All Ages	393	Sexually transmitted diseases excluding HIV	3	1	Number	2000	9274.82	15167.3	5231.39
1	Deaths	179	Ethiopia	3	Both	23	5-14 years	393	Sexually transmitted diseases excluding HIV	3	1	Number	2000	561.032	971.891	278.138
1	Deaths	179	Ethiopia	3	Both	24	15-49 years	393	Sexually transmitted diseases excluding HIV	3	1	Number	2000	316.436	412.171	208.323
1	Deaths	179	Ethiopia	3	Both	25	50-69 years	393	Sexually transmitted diseases excluding HIV	3	1	Number	2000	131.67	186.251	88.1262
1	Deaths	179	Ethiopia	3	Both	26	70+ years	393	Sexually transmitted diseases excluding HIV	3	1	Number	2000	32.0303	45.4299	22.1846
1	Deaths	179	Ethiopia	3	Both	28	<1 year	393	Sexually transmitted diseases excluding HIV	3	1	Number	2000	6541.04	10823.1	3525.97
1	Deaths	179	Ethiopia	3	Both	30	80 to 84	393	Sexually transmitted diseases excluding HIV	3	1	Number	2000	4.26948	6.63527	2.65536
1	Deaths	179	Ethiopia	3	Both	31	85 to 89	393	Sexually transmitted diseases excluding HIV	3	1	Number	2000	3.69871	5.87479	2.34486
1	Deaths	179	Ethiopia	3	Both	32	90 to 94	393	Sexually transmitted diseases excluding HIV	3	1	Number	2000	2.40291	3.69746	1.4489
1	Deaths	179	Ethiopia	3	Both	158	<20 years	393	Sexually transmitted diseases excluding HIV	3	1	Number	2000	8857.45	14778.2	4855.97
1	Deaths	179	Ethiopia	3	Both	159	10 to 24	393	Sexually transmitted diseases excluding HIV	3	1	Number	2000	126.665	194.1	75.6114
1	Deaths	179	Ethiopia	3	Both	169	10 to 54	393	Sexually transmitted diseases excluding HIV	3	1	Number	2000	369.304	480.367	252.323
1	Deaths	179	Ethiopia	3	Both	235	95 plus	393	Sexually transmitted diseases excluding HIV	3	1	Number	2000	1.31376	1.95356	0.824223
1	Deaths	179	Ethiopia	3	Both	1	Under 5	394	Syphilis	4	1	Number	2000	8233.66	13674	4446.53
1	Deaths	179	Ethiopia	3	Both	2	Early Neonatal	394	Syphilis	4	1	Number	2000	2590.5	4334.61	1389.09
1	Deaths	179	Ethiopia	3	Both	3	Late Neonatal	394	Syphilis	4	1	Number	2000	1095.65	1842.29	571.97
1	Deaths	179	Ethiopia	3	Both	4	Post Neonatal	394	Syphilis	4	1	Number	2000	2854.9	4866.69	1441.32
1	Deaths	179	Ethiopia	3	Both	5	1 to 4	394	Syphilis	4	1	Number	2000	1692.61	2993.76	791.388
1	Deaths	179	Ethiopia	3	Both	6	5 to 9	394	Syphilis	4	1	Number	2000	549.156	954.349	269.604
1	Deaths	179	Ethiopia	3	Both	7	10 to 14	394	Syphilis	4	1	Number	2000	8.46738	17.3835	3.50131
1	Deaths	179	Ethiopia	3	Both	8	15 to 19	394	Syphilis	4	1	Number	2000	23.7575	43.6815	11.8422
1	Deaths	179	Ethiopia	3	Both	9	20 to 24	394	Syphilis	4	1	Number	2000	18.1951	29.6285	10.4925
1	Deaths	179	Ethiopia	3	Both	10	25 to 29	394	Syphilis	4	1	Number	2000	14.1226	21.7619	7.9047
1	Deaths	179	Ethiopia	3	Both	11	30 to 34	394	Syphilis	4	1	Number	2000	31.1278	63.0357	14.5915
1	Deaths	179	Ethiopia	3	Both	12	35 to 39	394	Syphilis	4	1	Number	2000	9.90155	18.5223	5.18674
1	Deaths	179	Ethiopia	3	Both	13	40 to 44	394	Syphilis	4	1	Number	2000	8.74892	18.4065	3.99856
1	Deaths	179	Ethiopia	3	Both	14	45 to 49	394	Syphilis	4	1	Number	2000	9.37348	17.2516	4.73801
1	Deaths	179	Ethiopia	3	Both	15	50 to 54	394	Syphilis	4	1	Number	2000	23.0816	44.9328	10.9917
1	Deaths	179	Ethiopia	3	Both	16	55 to 59	394	Syphilis	4	1	Number	2000	42.3913	80.3619	21.5112
1	Deaths	179	Ethiopia	3	Both	17	60 to 64	394	Syphilis	4	1	Number	2000	4.14005	6.51681	2.42113
1	Deaths	179	Ethiopia	3	Both	18	65 to 69	394	Syphilis	4	1	Number	2000	0.669152	1.08509	0.399192
1	Deaths	179	Ethiopia	3	Both	19	70 to 74	394	Syphilis	4	1	Number	2000	0.45303	0.772576	0.254858
1	Deaths	179	Ethiopia	3	Both	20	75 to 79	394	Syphilis	4	1	Number	2000	5.689	8.81275	3.42785
1	Deaths	179	Ethiopia	3	Both	22	All Ages	394	Syphilis	4	1	Number	2000	8988.71	14907	4974.62
1	Deaths	179	Ethiopia	3	Both	23	5-14 years	394	Syphilis	4	1	Number	2000	557.623	967.596	275.993
1	Deaths	179	Ethiopia	3	Both	24	15-49 years	394	Syphilis	4	1	Number	2000	115.227	161.98	74.7301
1	Deaths	179	Ethiopia	3	Both	25	50-69 years	394	Syphilis	4	1	Number	2000	70.2822	117.297	42.5354
1	Deaths	179	Ethiopia	3	Both	26	70+ years	394	Syphilis	4	1	Number	2000	11.9244	16.7751	8.54288
1	Deaths	179	Ethiopia	3	Both	28	<1 year	394	Syphilis	4	1	Number	2000	6541.04	10823.1	3525.97
1	Deaths	179	Ethiopia	3	Both	30	80 to 84	394	Syphilis	4	1	Number	2000	2.24101	4.07627	1.21291
1	Deaths	179	Ethiopia	3	Both	31	85 to 89	394	Syphilis	4	1	Number	2000	1.86134	3.44181	0.976308
1	Deaths	179	Ethiopia	3	Both	32	90 to 94	394	Syphilis	4	1	Number	2000	1.12968	1.973	0.658296
1	Deaths	179	Ethiopia	3	Both	158	<20 years	394	Syphilis	4	1	Number	2000	8815.04	14745.8	4804.88
1	Deaths	179	Ethiopia	3	Both	159	10 to 24	394	Syphilis	4	1	Number	2000	50.4199	75.5139	30.6181
1	Deaths	179	Ethiopia	3	Both	169	10 to 54	394	Syphilis	4	1	Number	2000	146.776	201.597	96.9952
1	Deaths	179	Ethiopia	3	Both	235	95 plus	394	Syphilis	4	1	Number	2000	0.55037	0.90652	0.317233
1	Deaths	179	Ethiopia	3	Both	7	10 to 14	395	Chlamydial infection	4	1	Number	2000	0.678368	1.8056	0.218521
1	Deaths	179	Ethiopia	3	Both	8	15 to 19	395	Chlamydial infection	4	1	Number	2000	6.75733	14.7639	2.75101
1	Deaths	179	Ethiopia	3	Both	9	20 to 24	395	Chlamydial infection	4	1	Number	2000	9.90192	16.4647	5.3182
1	Deaths	179	Ethiopia	3	Both	10	25 to 29	395	Chlamydial infection	4	1	Number	2000	9.11233	14.9835	4.64345
1	Deaths	179	Ethiopia	3	Both	11	30 to 34	395	Chlamydial infection	4	1	Number	2000	2.9413	4.67938	1.531
1	Deaths	179	Ethiopia	3	Both	12	35 to 39	395	Chlamydial infection	4	1	Number	2000	5.42205	8.54848	3.07135
1	Deaths	179	Ethiopia	3	Both	13	40 to 44	395	Chlamydial infection	4	1	Number	2000	1.68423	2.74165	0.944482
1	Deaths	179	Ethiopia	3	Both	14	45 to 49	395	Chlamydial infection	4	1	Number	2000	3.50623	5.76535	1.93216
1	Deaths	179	Ethiopia	3	Both	15	50 to 54	395	Chlamydial infection	4	1	Number	2000	3.14741	5.21809	1.7125
1	Deaths	179	Ethiopia	3	Both	16	55 to 59	395	Chlamydial infection	4	1	Number	2000	5.57939	9.15539	3.10911
1	Deaths	179	Ethiopia	3	Both	17	60 to 64	395	Chlamydial infection	4	1	Number	2000	2.29939	3.90862	1.24245
1	Deaths	179	Ethiopia	3	Both	18	65 to 69	395	Chlamydial infection	4	1	Number	2000	0.222193	0.367287	0.125217
1	Deaths	179	Ethiopia	3	Both	19	70 to 74	395	Chlamydial infection	4	1	Number	2000	0.161166	0.277861	0.0865927
1	Deaths	179	Ethiopia	3	Both	20	75 to 79	395	Chlamydial infection	4	1	Number	2000	2.29406	3.73884	1.30308
1	Deaths	179	Ethiopia	3	Both	22	All Ages	395	Chlamydial infection	4	1	Number	2000	54.9633	71.4325	34.6763
1	Deaths	179	Ethiopia	3	Both	23	5-14 years	395	Chlamydial infection	4	1	Number	2000	0.678368	1.8056	0.218521
1	Deaths	179	Ethiopia	3	Both	24	15-49 years	395	Chlamydial infection	4	1	Number	2000	39.3254	52.9277	23.9645
1	Deaths	179	Ethiopia	3	Both	25	50-69 years	395	Chlamydial infection	4	1	Number	2000	11.2484	16.1178	7.49698
1	Deaths	179	Ethiopia	3	Both	26	70+ years	395	Chlamydial infection	4	1	Number	2000	3.71121	5.34177	2.46633
1	Deaths	179	Ethiopia	3	Both	30	80 to 84	395	Chlamydial infection	4	1	Number	2000	0.451212	0.737378	0.259072
1	Deaths	179	Ethiopia	3	Both	31	85 to 89	395	Chlamydial infection	4	1	Number	2000	0.394058	0.624036	0.237411
1	Deaths	179	Ethiopia	3	Both	32	90 to 94	395	Chlamydial infection	4	1	Number	2000	0.264044	0.437314	0.145345
1	Deaths	179	Ethiopia	3	Both	158	<20 years	395	Chlamydial infection	4	1	Number	2000	7.4357	15.4361	3.25953
1	Deaths	179	Ethiopia	3	Both	159	10 to 24	395	Chlamydial infection	4	1	Number	2000	17.3376	27.3625	9.87163
1	Deaths	179	Ethiopia	3	Both	169	10 to 54	395	Chlamydial infection	4	1	Number	2000	43.1512	57.7864	26.3205
1	Deaths	179	Ethiopia	3	Both	235	95 plus	395	Chlamydial infection	4	1	Number	2000	0.146665	0.22538	0.0823119
1	Deaths	179	Ethiopia	3	Both	7	10 to 14	396	Gonococcal infection	4	1	Number	2000	1.83293	3.94631	0.755384
1	Deaths	179	Ethiopia	3	Both	8	15 to 19	396	Gonococcal infection	4	1	Number	2000	17.8453	37.4941	7.72324
1	Deaths	179	Ethiopia	3	Both	9	20 to 24	396	Gonococcal infection	4	1	Number	2000	14.858	24.4961	8.19806
1	Deaths	179	Ethiopia	3	Both	10	25 to 29	396	Gonococcal infection	4	1	Number	2000	24.1279	39.2521	12.5823
1	Deaths	179	Ethiopia	3	Both	11	30 to 34	396	Gonococcal infection	4	1	Number	2000	15.8711	24.1443	9.04939
1	Deaths	179	Ethiopia	3	Both	12	35 to 39	396	Gonococcal infection	4	1	Number	2000	15.3	23.9233	8.79271
1	Deaths	179	Ethiopia	3	Both	13	40 to 44	396	Gonococcal infection	4	1	Number	2000	4.64975	7.30024	2.73936
1	Deaths	179	Ethiopia	3	Both	14	45 to 49	396	Gonococcal infection	4	1	Number	2000	9.68194	15.6963	5.49406
1	Deaths	179	Ethiopia	3	Both	15	50 to 54	396	Gonococcal infection	4	1	Number	2000	9.69532	15.6336	5.50847
1	Deaths	179	Ethiopia	3	Both	16	55 to 59	396	Gonococcal infection	4	1	Number	2000	15.9658	24.9361	9.25439
1	Deaths	179	Ethiopia	3	Both	17	60 to 64	396	Gonococcal infection	4	1	Number	2000	5.5227	9.35796	2.99252
1	Deaths	179	Ethiopia	3	Both	18	65 to 69	396	Gonococcal infection	4	1	Number	2000	1.20752	1.99473	0.680911
1	Deaths	179	Ethiopia	3	Both	19	70 to 74	396	Gonococcal infection	4	1	Number	2000	0.598624	1.03017	0.321936
1	Deaths	179	Ethiopia	3	Both	20	75 to 79	396	Gonococcal infection	4	1	Number	2000	8.61503	14.0071	4.90423
1	Deaths	179	Ethiopia	3	Both	22	All Ages	396	Gonococcal infection	4	1	Number	2000	149.266	191.222	99.1328
1	Deaths	179	Ethiopia	3	Both	23	5-14 years	396	Gonococcal infection	4	1	Number	2000	1.83293	3.94631	0.755384
1	Deaths	179	Ethiopia	3	Both	24	15-49 years	396	Gonococcal infection	4	1	Number	2000	102.334	135.537	64.7887
1	Deaths	179	Ethiopia	3	Both	25	50-69 years	396	Gonococcal infection	4	1	Number	2000	32.3914	45.9511	22.0043
1	Deaths	179	Ethiopia	3	Both	26	70+ years	396	Gonococcal infection	4	1	Number	2000	12.7078	18.5938	8.43799
1	Deaths	179	Ethiopia	3	Both	30	80 to 84	396	Gonococcal infection	4	1	Number	2000	1.21293	1.94757	0.747009
1	Deaths	179	Ethiopia	3	Both	31	85 to 89	396	Gonococcal infection	4	1	Number	2000	1.08606	1.6565	0.685794
1	Deaths	179	Ethiopia	3	Both	32	90 to 94	396	Gonococcal infection	4	1	Number	2000	0.764442	1.22862	0.442933
1	Deaths	179	Ethiopia	3	Both	158	<20 years	396	Gonococcal infection	4	1	Number	2000	19.6782	39.3633	9.28182
1	Deaths	179	Ethiopia	3	Both	159	10 to 24	396	Gonococcal infection	4	1	Number	2000	34.5362	55.8164	20.1747
1	Deaths	179	Ethiopia	3	Both	169	10 to 54	396	Gonococcal infection	4	1	Number	2000	113.862	148.559	73.6665
1	Deaths	179	Ethiopia	3	Both	235	95 plus	396	Gonococcal infection	4	1	Number	2000	0.430697	0.638038	0.26093
1	Deaths	179	Ethiopia	3	Both	7	10 to 14	399	Other sexually transmitted diseases	4	1	Number	2000	0.897208	1.92976	0.373103
1	Deaths	179	Ethiopia	3	Both	8	15 to 19	399	Other sexually transmitted diseases	4	1	Number	2000	14.4019	31.1391	6.11244
1	Deaths	179	Ethiopia	3	Both	9	20 to 24	399	Other sexually transmitted diseases	4	1	Number	2000	9.07169	14.9903	4.99189
1	Deaths	179	Ethiopia	3	Both	10	25 to 29	399	Other sexually transmitted diseases	4	1	Number	2000	10.5288	17.2632	5.4294
1	Deaths	179	Ethiopia	3	Both	11	30 to 34	399	Other sexually transmitted diseases	4	1	Number	2000	7.93179	12.1638	4.45263
1	Deaths	179	Ethiopia	3	Both	12	35 to 39	399	Other sexually transmitted diseases	4	1	Number	2000	9.58627	14.9297	5.54493
1	Deaths	179	Ethiopia	3	Both	13	40 to 44	399	Other sexually transmitted diseases	4	1	Number	2000	2.4588	3.82928	1.46183
1	Deaths	179	Ethiopia	3	Both	14	45 to 49	399	Other sexually transmitted diseases	4	1	Number	2000	5.57073	8.95841	3.21186
1	Deaths	179	Ethiopia	3	Both	15	50 to 54	399	Other sexually transmitted diseases	4	1	Number	2000	5.06783	8.03746	2.97964
1	Deaths	179	Ethiopia	3	Both	16	55 to 59	399	Other sexually transmitted diseases	4	1	Number	2000	8.94401	13.6865	5.39224
1	Deaths	179	Ethiopia	3	Both	17	60 to 64	399	Other sexually transmitted diseases	4	1	Number	2000	3.36736	5.70196	1.82536
1	Deaths	179	Ethiopia	3	Both	18	65 to 69	399	Other sexually transmitted diseases	4	1	Number	2000	0.369019	0.608824	0.20833
1	Deaths	179	Ethiopia	3	Both	19	70 to 74	399	Other sexually transmitted diseases	4	1	Number	2000	0.208635	0.358877	0.112228
1	Deaths	179	Ethiopia	3	Both	20	75 to 79	399	Other sexually transmitted diseases	4	1	Number	2000	2.32591	3.77094	1.3333
1	Deaths	179	Ethiopia	3	Both	22	All Ages	399	Other sexually transmitted diseases	4	1	Number	2000	81.8823	106.824	54.2704
1	Deaths	179	Ethiopia	3	Both	23	5-14 years	399	Other sexually transmitted diseases	4	1	Number	2000	0.897208	1.92976	0.373103
1	Deaths	179	Ethiopia	3	Both	24	15-49 years	399	Other sexually transmitted diseases	4	1	Number	2000	59.55	81.3215	37.6245
1	Deaths	179	Ethiopia	3	Both	25	50-69 years	399	Other sexually transmitted diseases	4	1	Number	2000	17.7482	24.8837	12.2314
1	Deaths	179	Ethiopia	3	Both	26	70+ years	399	Other sexually transmitted diseases	4	1	Number	2000	3.68689	5.25912	2.49734
1	Deaths	179	Ethiopia	3	Both	30	80 to 84	399	Other sexually transmitted diseases	4	1	Number	2000	0.36433	0.568778	0.228751
1	Deaths	179	Ethiopia	3	Both	31	85 to 89	399	Other sexually transmitted diseases	4	1	Number	2000	0.357251	0.540728	0.230842
1	Deaths	179	Ethiopia	3	Both	32	90 to 94	399	Other sexually transmitted diseases	4	1	Number	2000	0.244737	0.382544	0.143092
1	Deaths	179	Ethiopia	3	Both	158	<20 years	399	Other sexually transmitted diseases	4	1	Number	2000	15.2991	31.9731	6.76913
1	Deaths	179	Ethiopia	3	Both	159	10 to 24	399	Other sexually transmitted diseases	4	1	Number	2000	24.3708	41.3074	13.7622
1	Deaths	179	Ethiopia	3	Both	169	10 to 54	399	Other sexually transmitted diseases	4	1	Number	2000	65.515	88.2185	42.282
1	Deaths	179	Ethiopia	3	Both	235	95 plus	399	Other sexually transmitted diseases	4	1	Number	2000	0.186028	0.276296	0.115288
1	Deaths	179	Ethiopia	3	Both	1	Under 5	400	Acute hepatitis	3	1	Number	2000	370.093	561.487	218.827
1	Deaths	179	Ethiopia	3	Both	2	Early Neonatal	400	Acute hepatitis	3	1	Number	2000	0	0	0
1	Deaths	179	Ethiopia	3	Both	3	Late Neonatal	400	Acute hepatitis	3	1	Number	2000	0	0	0
1	Deaths	179	Ethiopia	3	Both	4	Post Neonatal	400	Acute hepatitis	3	1	Number	2000	107.284	181.229	60.7687
1	Deaths	179	Ethiopia	3	Both	5	1 to 4	400	Acute hepatitis	3	1	Number	2000	262.808	432.918	140.573
1	Deaths	179	Ethiopia	3	Both	6	5 to 9	400	Acute hepatitis	3	1	Number	2000	79.8938	140.137	41.0028
1	Deaths	179	Ethiopia	3	Both	7	10 to 14	400	Acute hepatitis	3	1	Number	2000	116.286	176.545	70.4475
1	Deaths	179	Ethiopia	3	Both	8	15 to 19	400	Acute hepatitis	3	1	Number	2000	137.085	215.448	84.9832
1	Deaths	179	Ethiopia	3	Both	9	20 to 24	400	Acute hepatitis	3	1	Number	2000	260.273	372.657	170.915
1	Deaths	179	Ethiopia	3	Both	10	25 to 29	400	Acute hepatitis	3	1	Number	2000	197.471	298.846	126.566
1	Deaths	179	Ethiopia	3	Both	11	30 to 34	400	Acute hepatitis	3	1	Number	2000	168.178	266.489	103.777
1	Deaths	179	Ethiopia	3	Both	12	35 to 39	400	Acute hepatitis	3	1	Number	2000	169.862	248.514	107.922
1	Deaths	179	Ethiopia	3	Both	13	40 to 44	400	Acute hepatitis	3	1	Number	2000	170.217	294.88	91.7386
1	Deaths	179	Ethiopia	3	Both	14	45 to 49	400	Acute hepatitis	3	1	Number	2000	202.711	344.486	114.605
1	Deaths	179	Ethiopia	3	Both	15	50 to 54	400	Acute hepatitis	3	1	Number	2000	131.154	201.503	79.7395
1	Deaths	179	Ethiopia	3	Both	16	55 to 59	400	Acute hepatitis	3	1	Number	2000	243.082	357.334	160.433
1	Deaths	179	Ethiopia	3	Both	17	60 to 64	400	Acute hepatitis	3	1	Number	2000	138.845	208.262	85.7887
1	Deaths	179	Ethiopia	3	Both	18	65 to 69	400	Acute hepatitis	3	1	Number	2000	197.031	294.262	124.766
1	Deaths	179	Ethiopia	3	Both	19	70 to 74	400	Acute hepatitis	3	1	Number	2000	152.574	231.386	98.8343
1	Deaths	179	Ethiopia	3	Both	20	75 to 79	400	Acute hepatitis	3	1	Number	2000	134.809	204.768	84.3221
1	Deaths	179	Ethiopia	3	Both	22	All Ages	400	Acute hepatitis	3	1	Number	2000	2996.18	3469.76	2525.03
1	Deaths	179	Ethiopia	3	Both	11	30 to 34	614	Thalassemias	4	1	Number	2000	0.0717707	0.111446	0.0417389
1	Deaths	179	Ethiopia	3	Both	12	35 to 39	614	Thalassemias	4	1	Number	2000	0.0212844	0.0333478	0.0131701
1	Deaths	179	Ethiopia	3	Both	13	40 to 44	614	Thalassemias	4	1	Number	2000	0.0069606	0.0110239	0.00437438
1	Deaths	179	Ethiopia	3	Both	14	45 to 49	614	Thalassemias	4	1	Number	2000	0.00270394	0.00418523	0.00166896
1	Deaths	179	Ethiopia	3	Both	15	50 to 54	614	Thalassemias	4	1	Number	2000	0.000431903	0.000685747	0.000265748
1	Deaths	179	Ethiopia	3	Both	16	55 to 59	614	Thalassemias	4	1	Number	2000	5.10652e-05	8.0366e-05	3.02432e-05
1	Deaths	179	Ethiopia	3	Both	17	60 to 64	614	Thalassemias	4	1	Number	2000	5.77023e-06	9.45313e-06	3.30143e-06
1	Deaths	179	Ethiopia	3	Both	18	65 to 69	614	Thalassemias	4	1	Number	2000	5.38145e-07	8.69574e-07	3.23688e-07
1	Deaths	179	Ethiopia	3	Both	19	70 to 74	614	Thalassemias	4	1	Number	2000	6.15574e-08	9.98035e-08	3.66437e-08
1	Deaths	179	Ethiopia	3	Both	20	75 to 79	614	Thalassemias	4	1	Number	2000	4.66464e-09	7.33477e-09	2.7166e-09
1	Deaths	179	Ethiopia	3	Both	22	All Ages	614	Thalassemias	4	1	Number	2000	1000.51	1424.1	656.861
1	Deaths	179	Ethiopia	3	Both	23	5-14 years	614	Thalassemias	4	1	Number	2000	34.4083	50.4323	20.7954
1	Deaths	179	Ethiopia	3	Both	24	15-49 years	614	Thalassemias	4	1	Number	2000	1.79953	2.66042	1.08048
1	Deaths	179	Ethiopia	3	Both	25	50-69 years	614	Thalassemias	4	1	Number	2000	0.000489277	0.000777379	0.000303834
1	Deaths	179	Ethiopia	3	Both	26	70+ years	614	Thalassemias	4	1	Number	2000	6.65362e-08	1.06512e-07	4.0017e-08
1	Deaths	179	Ethiopia	3	Both	28	<1 year	614	Thalassemias	4	1	Number	2000	544.519	772.814	370.237
1	Deaths	179	Ethiopia	3	Both	30	80 to 84	614	Thalassemias	4	1	Number	2000	3.03192e-10	4.87745e-10	1.82268e-10
1	Deaths	179	Ethiopia	3	Both	31	85 to 89	614	Thalassemias	4	1	Number	2000	1.06462e-11	1.69226e-11	6.30434e-12
1	Deaths	179	Ethiopia	3	Both	32	90 to 94	614	Thalassemias	4	1	Number	2000	2.66138e-13	4.12379e-13	1.60163e-13
1	Deaths	179	Ethiopia	3	Both	158	<20 years	614	Thalassemias	4	1	Number	2000	999.925	1423.51	656.367
1	Deaths	179	Ethiopia	3	Both	159	10 to 24	614	Thalassemias	4	1	Number	2000	8.68416	13.1899	5.24104
1	Deaths	179	Ethiopia	3	Both	169	10 to 54	614	Thalassemias	4	1	Number	2000	8.94494	13.5407	5.39948
1	Deaths	179	Ethiopia	3	Both	235	95 plus	614	Thalassemias	4	1	Number	2000	4.62804e-15	7.39873e-15	2.85283e-15
1	Deaths	179	Ethiopia	3	Both	1	Under 5	615	Sickle cell disorders	4	1	Number	2000	534.253	808	327.402
1	Deaths	179	Ethiopia	3	Both	2	Early Neonatal	615	Sickle cell disorders	4	1	Number	2000	48.9856	77.1394	28.465
1	Deaths	179	Ethiopia	3	Both	3	Late Neonatal	615	Sickle cell disorders	4	1	Number	2000	28.7983	44.9848	16.6553
1	Deaths	179	Ethiopia	3	Both	4	Post Neonatal	615	Sickle cell disorders	4	1	Number	2000	166.112	270.677	91.9666
1	Deaths	179	Ethiopia	3	Both	5	1 to 4	615	Sickle cell disorders	4	1	Number	2000	290.357	467.915	152.852
1	Deaths	179	Ethiopia	3	Both	6	5 to 9	615	Sickle cell disorders	4	1	Number	2000	37.0585	59.2572	20.2047
1	Deaths	179	Ethiopia	3	Both	7	10 to 14	615	Sickle cell disorders	4	1	Number	2000	44.4505	71.8125	25.3047
1	Deaths	179	Ethiopia	3	Both	8	15 to 19	615	Sickle cell disorders	4	1	Number	2000	44.3669	68.4807	24.7256
1	Deaths	179	Ethiopia	3	Both	9	20 to 24	615	Sickle cell disorders	4	1	Number	2000	35.4532	53.9419	20.9627
1	Deaths	179	Ethiopia	3	Both	10	25 to 29	615	Sickle cell disorders	4	1	Number	2000	24.9353	39.0282	14.7198
1	Deaths	179	Ethiopia	3	Both	11	30 to 34	615	Sickle cell disorders	4	1	Number	2000	13.9631	21.933	7.88673
1	Deaths	179	Ethiopia	3	Both	12	35 to 39	615	Sickle cell disorders	4	1	Number	2000	6.09555	9.62095	3.54493
1	Deaths	179	Ethiopia	3	Both	13	40 to 44	615	Sickle cell disorders	4	1	Number	2000	3.23659	5.33972	1.88956
1	Deaths	179	Ethiopia	3	Both	14	45 to 49	615	Sickle cell disorders	4	1	Number	2000	2.31174	3.74464	1.26081
1	Deaths	179	Ethiopia	3	Both	15	50 to 54	615	Sickle cell disorders	4	1	Number	2000	0.973801	1.6804	0.530872
1	Deaths	179	Ethiopia	3	Both	16	55 to 59	615	Sickle cell disorders	4	1	Number	2000	0.206601	0.353547	0.112076
1	Deaths	179	Ethiopia	3	Both	17	60 to 64	615	Sickle cell disorders	4	1	Number	2000	0.0431328	0.0737522	0.022976
1	Deaths	179	Ethiopia	3	Both	18	65 to 69	615	Sickle cell disorders	4	1	Number	2000	0.00640819	0.0106024	0.00358238
1	Deaths	179	Ethiopia	3	Both	19	70 to 74	615	Sickle cell disorders	4	1	Number	2000	0.00123019	0.00209444	0.000655654
1	Deaths	179	Ethiopia	3	Both	20	75 to 79	615	Sickle cell disorders	4	1	Number	2000	0.00011839	0.000196459	6.42171e-05
1	Deaths	179	Ethiopia	3	Both	22	All Ages	615	Sickle cell disorders	4	1	Number	2000	747.355	1079.45	492.094
1	Deaths	179	Ethiopia	3	Both	23	5-14 years	615	Sickle cell disorders	4	1	Number	2000	81.509	123.099	50.8044
1	Deaths	179	Ethiopia	3	Both	24	15-49 years	615	Sickle cell disorders	4	1	Number	2000	130.363	191.215	80.1271
1	Deaths	179	Ethiopia	3	Both	25	50-69 years	615	Sickle cell disorders	4	1	Number	2000	1.22994	2.11553	0.683994
1	Deaths	179	Ethiopia	3	Both	26	70+ years	615	Sickle cell disorders	4	1	Number	2000	0.00135904	0.00230645	0.000720603
1	Deaths	179	Ethiopia	3	Both	28	<1 year	615	Sickle cell disorders	4	1	Number	2000	243.896	371.962	148.607
1	Deaths	179	Ethiopia	3	Both	30	80 to 84	615	Sickle cell disorders	4	1	Number	2000	1.00075e-05	1.68546e-05	5.34498e-06
1	Deaths	179	Ethiopia	3	Both	31	85 to 89	615	Sickle cell disorders	4	1	Number	2000	4.40037e-07	7.45634e-07	2.38e-07
1	Deaths	179	Ethiopia	3	Both	32	90 to 94	615	Sickle cell disorders	4	1	Number	2000	1.44255e-08	2.50129e-08	7.60594e-09
1	Deaths	179	Ethiopia	3	Both	158	<20 years	615	Sickle cell disorders	4	1	Number	2000	660.129	965.206	421.293
1	Deaths	179	Ethiopia	3	Both	159	10 to 24	615	Sickle cell disorders	4	1	Number	2000	124.271	180.099	74.0166
1	Deaths	179	Ethiopia	3	Both	169	10 to 54	615	Sickle cell disorders	4	1	Number	2000	175.787	254.443	108.697
1	Deaths	179	Ethiopia	3	Both	235	95 plus	615	Sickle cell disorders	4	1	Number	2000	3.24259e-10	5.75756e-10	1.68817e-10
1	Deaths	179	Ethiopia	3	Both	1	Under 5	616	G6PD deficiency	4	1	Number	2000	224.051	331.118	140.254
1	Deaths	179	Ethiopia	3	Both	2	Early Neonatal	616	G6PD deficiency	4	1	Number	2000	16.6508	25.5	10.4806
1	Deaths	179	Ethiopia	3	Both	3	Late Neonatal	616	G6PD deficiency	4	1	Number	2000	9.88072	14.9898	6.22348
1	Deaths	179	Ethiopia	3	Both	4	Post Neonatal	616	G6PD deficiency	4	1	Number	2000	58.7187	93.0463	34.2822
1	Deaths	179	Ethiopia	3	Both	5	1 to 4	616	G6PD deficiency	4	1	Number	2000	138.801	223.904	72.3975
1	Deaths	179	Ethiopia	3	Both	6	5 to 9	616	G6PD deficiency	4	1	Number	2000	31.9035	50.6802	18.2212
1	Deaths	179	Ethiopia	3	Both	7	10 to 14	616	G6PD deficiency	4	1	Number	2000	47.078	72.5026	27.3439
1	Deaths	179	Ethiopia	3	Both	8	15 to 19	616	G6PD deficiency	4	1	Number	2000	49.0428	73.6765	29.4952
1	Deaths	179	Ethiopia	3	Both	9	20 to 24	616	G6PD deficiency	4	1	Number	2000	55.0565	81.5561	34.3986
1	Deaths	179	Ethiopia	3	Both	10	25 to 29	616	G6PD deficiency	4	1	Number	2000	68.3996	98.1576	44.0092
1	Deaths	179	Ethiopia	3	Both	11	30 to 34	616	G6PD deficiency	4	1	Number	2000	68.2787	100.749	44.945
1	Deaths	179	Ethiopia	3	Both	12	35 to 39	616	G6PD deficiency	4	1	Number	2000	50.9099	72.525	35.743
1	Deaths	179	Ethiopia	3	Both	13	40 to 44	616	G6PD deficiency	4	1	Number	2000	51.9376	74.7647	34.4278
1	Deaths	179	Ethiopia	3	Both	14	45 to 49	616	G6PD deficiency	4	1	Number	2000	71.8397	100.186	49.076
1	Deaths	179	Ethiopia	3	Both	15	50 to 54	616	G6PD deficiency	4	1	Number	2000	50.3297	66.9349	35.6174
1	Deaths	179	Ethiopia	3	Both	16	55 to 59	616	G6PD deficiency	4	1	Number	2000	44.3187	60.6483	30.8145
1	Deaths	179	Ethiopia	3	Both	17	60 to 64	616	G6PD deficiency	4	1	Number	2000	32.487	46.024	21.8842
1	Deaths	179	Ethiopia	3	Both	18	65 to 69	616	G6PD deficiency	4	1	Number	2000	22.8543	31.8274	15.5357
1	Deaths	179	Ethiopia	3	Both	19	70 to 74	616	G6PD deficiency	4	1	Number	2000	17.0038	24.0962	11.9226
1	Deaths	179	Ethiopia	3	Both	20	75 to 79	616	G6PD deficiency	4	1	Number	2000	10.4587	14.6175	6.96595
1	Deaths	179	Ethiopia	3	Both	22	All Ages	616	G6PD deficiency	4	1	Number	2000	901.776	1102.24	689.125
1	Deaths	179	Ethiopia	3	Both	23	5-14 years	616	G6PD deficiency	4	1	Number	2000	78.9814	112.414	50.1695
1	Deaths	179	Ethiopia	3	Both	24	15-49 years	616	G6PD deficiency	4	1	Number	2000	415.465	521.925	289.665
1	Deaths	179	Ethiopia	3	Both	25	50-69 years	616	G6PD deficiency	4	1	Number	2000	149.99	187.574	110.547
1	Deaths	179	Ethiopia	3	Both	26	70+ years	616	G6PD deficiency	4	1	Number	2000	33.2889	42.5282	24.8177
1	Deaths	179	Ethiopia	3	Both	28	<1 year	616	G6PD deficiency	4	1	Number	2000	85.2502	124.2	55.8215
1	Deaths	179	Ethiopia	3	Both	30	80 to 84	616	G6PD deficiency	4	1	Number	2000	4.51029	6.34485	3.00776
1	Deaths	179	Ethiopia	3	Both	31	85 to 89	616	G6PD deficiency	4	1	Number	2000	1.111	1.60418	0.772687
1	Deaths	179	Ethiopia	3	Both	32	90 to 94	616	G6PD deficiency	4	1	Number	2000	0.183903	0.258097	0.126658
1	Deaths	179	Ethiopia	3	Both	158	<20 years	616	G6PD deficiency	4	1	Number	2000	352.076	491.541	242.297
1	Deaths	179	Ethiopia	3	Both	159	10 to 24	616	G6PD deficiency	4	1	Number	2000	151.177	207.802	97.0879
1	Deaths	179	Ethiopia	3	Both	169	10 to 54	616	G6PD deficiency	4	1	Number	2000	512.873	631.449	359.816
1	Deaths	179	Ethiopia	3	Both	235	95 plus	616	G6PD deficiency	4	1	Number	2000	0.0212363	0.0309078	0.0135087
1	Deaths	179	Ethiopia	3	Both	1	Under 5	618	Other hemoglobinopathies and hemolytic anemias	4	1	Number	2000	93.2699	126.619	64.6104
1	Deaths	179	Ethiopia	3	Both	2	Early Neonatal	618	Other hemoglobinopathies and hemolytic anemias	4	1	Number	2000	33.0317	48.801	21.9374
1	Deaths	179	Ethiopia	3	Both	3	Late Neonatal	618	Other hemoglobinopathies and hemolytic anemias	4	1	Number	2000	6.07914	8.82998	3.88568
1	Deaths	179	Ethiopia	3	Both	4	Post Neonatal	618	Other hemoglobinopathies and hemolytic anemias	4	1	Number	2000	22.6907	36.1171	13.691
1	Deaths	179	Ethiopia	3	Both	5	1 to 4	618	Other hemoglobinopathies and hemolytic anemias	4	1	Number	2000	31.4683	50.3956	17.6118
1	Deaths	179	Ethiopia	3	Both	6	5 to 9	618	Other hemoglobinopathies and hemolytic anemias	4	1	Number	2000	6.08123	9.42933	3.4981
1	Deaths	179	Ethiopia	3	Both	7	10 to 14	618	Other hemoglobinopathies and hemolytic anemias	4	1	Number	2000	12.6091	19.6704	7.53395
1	Deaths	179	Ethiopia	3	Both	8	15 to 19	618	Other hemoglobinopathies and hemolytic anemias	4	1	Number	2000	13.0905	19.9901	7.63297
1	Deaths	179	Ethiopia	3	Both	9	20 to 24	618	Other hemoglobinopathies and hemolytic anemias	4	1	Number	2000	16.5913	24.5416	10.5726
1	Deaths	179	Ethiopia	3	Both	10	25 to 29	618	Other hemoglobinopathies and hemolytic anemias	4	1	Number	2000	17.0067	24.4268	11.0862
1	Deaths	179	Ethiopia	3	Both	11	30 to 34	618	Other hemoglobinopathies and hemolytic anemias	4	1	Number	2000	19.6342	28.4584	12.6498
1	Deaths	179	Ethiopia	3	Both	12	35 to 39	618	Other hemoglobinopathies and hemolytic anemias	4	1	Number	2000	20.4816	29.8813	13.7143
1	Deaths	179	Ethiopia	3	Both	13	40 to 44	618	Other hemoglobinopathies and hemolytic anemias	4	1	Number	2000	23.3304	33.8007	15.7195
1	Deaths	179	Ethiopia	3	Both	14	45 to 49	618	Other hemoglobinopathies and hemolytic anemias	4	1	Number	2000	37.3115	52.5089	25.1809
1	Deaths	179	Ethiopia	3	Both	15	50 to 54	618	Other hemoglobinopathies and hemolytic anemias	4	1	Number	2000	42.5129	58.0903	29.6632
1	Deaths	179	Ethiopia	3	Both	16	55 to 59	618	Other hemoglobinopathies and hemolytic anemias	4	1	Number	2000	59.4388	81.115	41.5557
1	Deaths	179	Ethiopia	3	Both	17	60 to 64	618	Other hemoglobinopathies and hemolytic anemias	4	1	Number	2000	72.0767	99.1274	49.4609
1	Deaths	179	Ethiopia	3	Both	18	65 to 69	618	Other hemoglobinopathies and hemolytic anemias	4	1	Number	2000	83.1759	111.878	58.7149
1	Deaths	179	Ethiopia	3	Both	19	70 to 74	618	Other hemoglobinopathies and hemolytic anemias	4	1	Number	2000	104.543	143.172	74.3743
1	Deaths	179	Ethiopia	3	Both	20	75 to 79	618	Other hemoglobinopathies and hemolytic anemias	4	1	Number	2000	109.373	146.204	76.6069
1	Deaths	179	Ethiopia	3	Both	22	All Ages	618	Other hemoglobinopathies and hemolytic anemias	4	1	Number	2000	871.661	1032.88	681.793
1	Deaths	179	Ethiopia	3	Both	23	5-14 years	618	Other hemoglobinopathies and hemolytic anemias	4	1	Number	2000	18.6904	27.5314	11.9008
1	Deaths	179	Ethiopia	3	Both	24	15-49 years	618	Other hemoglobinopathies and hemolytic anemias	4	1	Number	2000	147.446	188.599	104.068
1	Deaths	179	Ethiopia	3	Both	25	50-69 years	618	Other hemoglobinopathies and hemolytic anemias	4	1	Number	2000	257.204	321.883	191.144
1	Deaths	179	Ethiopia	3	Both	26	70+ years	618	Other hemoglobinopathies and hemolytic anemias	4	1	Number	2000	355.05	434.153	273.833
1	Deaths	179	Ethiopia	3	Both	28	<1 year	618	Other hemoglobinopathies and hemolytic anemias	4	1	Number	2000	61.8015	84.0224	43.5663
1	Deaths	179	Ethiopia	3	Both	30	80 to 84	618	Other hemoglobinopathies and hemolytic anemias	4	1	Number	2000	89.4867	119.5	62.62
1	Deaths	179	Ethiopia	3	Both	31	85 to 89	618	Other hemoglobinopathies and hemolytic anemias	4	1	Number	2000	39.0598	51.9194	29.2579
1	Deaths	179	Ethiopia	3	Both	32	90 to 94	618	Other hemoglobinopathies and hemolytic anemias	4	1	Number	2000	10.5425	13.9691	7.83118
1	Deaths	179	Ethiopia	3	Both	158	<20 years	618	Other hemoglobinopathies and hemolytic anemias	4	1	Number	2000	125.051	165.718	90.3198
1	Deaths	179	Ethiopia	3	Both	159	10 to 24	618	Other hemoglobinopathies and hemolytic anemias	4	1	Number	2000	42.291	58.2846	26.6638
1	Deaths	179	Ethiopia	3	Both	169	10 to 54	618	Other hemoglobinopathies and hemolytic anemias	4	1	Number	2000	202.568	250.618	143.239
1	Deaths	179	Ethiopia	3	Both	235	95 plus	618	Other hemoglobinopathies and hemolytic anemias	4	1	Number	2000	2.04449	2.70343	1.56559
1	Deaths	179	Ethiopia	3	Both	1	Under 5	619	Endocrine, metabolic, blood, and immune disorders	3	1	Number	2000	163.199	240.281	108.347
1	Deaths	179	Ethiopia	3	Both	2	Early Neonatal	619	Endocrine, metabolic, blood, and immune disorders	3	1	Number	2000	14.0628	20.9617	8.78455
1	Deaths	179	Ethiopia	3	Both	3	Late Neonatal	619	Endocrine, metabolic, blood, and immune disorders	3	1	Number	2000	14.6333	23.5989	7.96373
1	Deaths	179	Ethiopia	3	Both	4	Post Neonatal	619	Endocrine, metabolic, blood, and immune disorders	3	1	Number	2000	92.3588	145.783	54.3335
1	Deaths	179	Ethiopia	3	Both	5	1 to 4	619	Endocrine, metabolic, blood, and immune disorders	3	1	Number	2000	42.1446	69.0214	22.6991
1	Deaths	179	Ethiopia	3	Both	6	5 to 9	619	Endocrine, metabolic, blood, and immune disorders	3	1	Number	2000	9.4323	14.3298	5.36031
1	Deaths	179	Ethiopia	3	Both	7	10 to 14	619	Endocrine, metabolic, blood, and immune disorders	3	1	Number	2000	14.4204	20.8522	9.46149
1	Deaths	179	Ethiopia	3	Both	8	15 to 19	619	Endocrine, metabolic, blood, and immune disorders	3	1	Number	2000	9.70317	13.5446	6.64817
1	Deaths	179	Ethiopia	3	Both	9	20 to 24	619	Endocrine, metabolic, blood, and immune disorders	3	1	Number	2000	6.73281	9.50808	4.61149
1	Deaths	179	Ethiopia	3	Both	10	25 to 29	619	Endocrine, metabolic, blood, and immune disorders	3	1	Number	2000	6.37902	9.17731	4.25468
1	Deaths	179	Ethiopia	3	Both	11	30 to 34	619	Endocrine, metabolic, blood, and immune disorders	3	1	Number	2000	35.7877	51.294	22.9871
1	Deaths	179	Ethiopia	3	Both	12	35 to 39	619	Endocrine, metabolic, blood, and immune disorders	3	1	Number	2000	12.5568	18.6804	8.41757
1	Deaths	179	Ethiopia	3	Both	13	40 to 44	619	Endocrine, metabolic, blood, and immune disorders	3	1	Number	2000	14.6937	19.9695	10.1681
1	Deaths	179	Ethiopia	3	Both	14	45 to 49	619	Endocrine, metabolic, blood, and immune disorders	3	1	Number	2000	17.4492	25.4424	11.1315
1	Deaths	179	Ethiopia	3	Both	15	50 to 54	619	Endocrine, metabolic, blood, and immune disorders	3	1	Number	2000	37.2553	53.9421	24.6856
1	Deaths	179	Ethiopia	3	Both	16	55 to 59	619	Endocrine, metabolic, blood, and immune disorders	3	1	Number	2000	41.0806	55.0899	28.9547
1	Deaths	179	Ethiopia	3	Both	17	60 to 64	619	Endocrine, metabolic, blood, and immune disorders	3	1	Number	2000	75.0909	108.251	41.1564
1	Deaths	179	Ethiopia	3	Both	18	65 to 69	619	Endocrine, metabolic, blood, and immune disorders	3	1	Number	2000	110.419	161.062	63.4876
1	Deaths	179	Ethiopia	3	Both	19	70 to 74	619	Endocrine, metabolic, blood, and immune disorders	3	1	Number	2000	51.737	73.8471	35.1717
1	Deaths	179	Ethiopia	3	Both	20	75 to 79	619	Endocrine, metabolic, blood, and immune disorders	3	1	Number	2000	64.1843	92.1766	43.4443
1	Deaths	179	Ethiopia	3	Both	22	All Ages	619	Endocrine, metabolic, blood, and immune disorders	3	1	Number	2000	723.647	852.593	586.377
1	Deaths	179	Ethiopia	3	Both	23	5-14 years	619	Endocrine, metabolic, blood, and immune disorders	3	1	Number	2000	23.8527	33.3816	16.0844
1	Deaths	179	Ethiopia	3	Both	24	15-49 years	619	Endocrine, metabolic, blood, and immune disorders	3	1	Number	2000	103.302	130.763	80.5385
1	Deaths	179	Ethiopia	3	Both	25	50-69 years	619	Endocrine, metabolic, blood, and immune disorders	3	1	Number	2000	263.846	336.245	165.186
1	Deaths	179	Ethiopia	3	Both	26	70+ years	619	Endocrine, metabolic, blood, and immune disorders	3	1	Number	2000	169.447	213.059	129.272
1	Deaths	179	Ethiopia	3	Both	28	<1 year	619	Endocrine, metabolic, blood, and immune disorders	3	1	Number	2000	121.055	179.221	80.0792
1	Deaths	179	Ethiopia	3	Both	30	80 to 84	619	Endocrine, metabolic, blood, and immune disorders	3	1	Number	2000	28.46	41.5091	18.424
1	Deaths	179	Ethiopia	3	Both	31	85 to 89	619	Endocrine, metabolic, blood, and immune disorders	3	1	Number	2000	21.0357	30.1872	13.8293
1	Deaths	179	Ethiopia	3	Both	32	90 to 94	619	Endocrine, metabolic, blood, and immune disorders	3	1	Number	2000	3.25764	5.50342	1.99757
1	Deaths	179	Ethiopia	3	Both	158	<20 years	619	Endocrine, metabolic, blood, and immune disorders	3	1	Number	2000	196.755	285.082	136.749
1	Deaths	179	Ethiopia	3	Both	159	10 to 24	619	Endocrine, metabolic, blood, and immune disorders	3	1	Number	2000	30.8564	39.964	23.4968
1	Deaths	179	Ethiopia	3	Both	169	10 to 54	619	Endocrine, metabolic, blood, and immune disorders	3	1	Number	2000	154.978	192.782	122.958
1	Deaths	179	Ethiopia	3	Both	235	95 plus	619	Endocrine, metabolic, blood, and immune disorders	3	1	Number	2000	0.772529	1.4649	0.441542
1	Deaths	179	Ethiopia	3	Both	6	5 to 9	626	Musculoskeletal disorders	2	1	Number	2000	13.1922	22.209	5.90344
1	Deaths	179	Ethiopia	3	Both	7	10 to 14	626	Musculoskeletal disorders	2	1	Number	2000	20.0547	30.9751	11.602
1	Deaths	179	Ethiopia	3	Both	8	15 to 19	626	Musculoskeletal disorders	2	1	Number	2000	25.1729	39.2198	14.9545
1	Deaths	179	Ethiopia	3	Both	9	20 to 24	626	Musculoskeletal disorders	2	1	Number	2000	24.3521	38.8577	14.537
1	Deaths	179	Ethiopia	3	Both	10	25 to 29	626	Musculoskeletal disorders	2	1	Number	2000	24.5086	40.4149	14.0394
1	Deaths	179	Ethiopia	3	Both	11	30 to 34	626	Musculoskeletal disorders	2	1	Number	2000	23.5011	37.1562	13.4641
1	Deaths	179	Ethiopia	3	Both	12	35 to 39	626	Musculoskeletal disorders	2	1	Number	2000	22.5594	36.1074	13.2395
1	Deaths	179	Ethiopia	3	Both	13	40 to 44	626	Musculoskeletal disorders	2	1	Number	2000	24.5384	37.7956	14.1596
1	Deaths	179	Ethiopia	3	Both	14	45 to 49	626	Musculoskeletal disorders	2	1	Number	2000	25.3314	38.0336	15.1801
1	Deaths	179	Ethiopia	3	Both	15	50 to 54	626	Musculoskeletal disorders	2	1	Number	2000	26.0044	39.2265	15.1401
1	Deaths	179	Ethiopia	3	Both	16	55 to 59	626	Musculoskeletal disorders	2	1	Number	2000	28.447	43.3335	17.2381
1	Deaths	179	Ethiopia	3	Both	17	60 to 64	626	Musculoskeletal disorders	2	1	Number	2000	29.4862	44.0481	17.4283
1	Deaths	179	Ethiopia	3	Both	18	65 to 69	626	Musculoskeletal disorders	2	1	Number	2000	34.1451	53.0448	19.8969
1	Deaths	179	Ethiopia	3	Both	19	70 to 74	626	Musculoskeletal disorders	2	1	Number	2000	29.8344	45.1001	16.7971
1	Deaths	179	Ethiopia	3	Both	20	75 to 79	626	Musculoskeletal disorders	2	1	Number	2000	30.2004	47.2083	16.4454
1	Deaths	179	Ethiopia	3	Both	22	All Ages	626	Musculoskeletal disorders	2	1	Number	2000	412.332	567.008	264.937
1	Deaths	179	Ethiopia	3	Both	23	5-14 years	626	Musculoskeletal disorders	2	1	Number	2000	33.2469	51.2497	18.2283
1	Deaths	179	Ethiopia	3	Both	24	15-49 years	626	Musculoskeletal disorders	2	1	Number	2000	169.964	247.731	104.223
1	Deaths	179	Ethiopia	3	Both	25	50-69 years	626	Musculoskeletal disorders	2	1	Number	2000	118.083	170.334	73.004
1	Deaths	179	Ethiopia	3	Both	26	70+ years	626	Musculoskeletal disorders	2	1	Number	2000	91.0383	138.327	52.1115
1	Deaths	179	Ethiopia	3	Both	30	80 to 84	626	Musculoskeletal disorders	2	1	Number	2000	19.0254	33.3174	9.79915
1	Deaths	179	Ethiopia	3	Both	31	85 to 89	626	Musculoskeletal disorders	2	1	Number	2000	8.72367	16.0113	4.30185
1	Deaths	179	Ethiopia	3	Both	32	90 to 94	626	Musculoskeletal disorders	2	1	Number	2000	2.69819	5.46879	1.23956
1	Deaths	179	Ethiopia	3	Both	158	<20 years	626	Musculoskeletal disorders	2	1	Number	2000	58.4198	87.1453	35.2147
1	Deaths	179	Ethiopia	3	Both	159	10 to 24	626	Musculoskeletal disorders	2	1	Number	2000	69.5796	102.953	43.9375
1	Deaths	179	Ethiopia	3	Both	169	10 to 54	626	Musculoskeletal disorders	2	1	Number	2000	216.023	314.73	133.401
1	Deaths	179	Ethiopia	3	Both	235	95 plus	626	Musculoskeletal disorders	2	1	Number	2000	0.556253	1.1175	0.24301
1	Deaths	179	Ethiopia	3	Both	6	5 to 9	627	Rheumatoid arthritis	3	1	Number	2000	4.04286	8.30416	1.17769
1	Deaths	179	Ethiopia	3	Both	7	10 to 14	627	Rheumatoid arthritis	3	1	Number	2000	4.80539	9.37953	1.72156
1	Deaths	179	Ethiopia	3	Both	8	15 to 19	627	Rheumatoid arthritis	3	1	Number	2000	3.76342	7.96884	1.55794
1	Deaths	179	Ethiopia	3	Both	9	20 to 24	627	Rheumatoid arthritis	3	1	Number	2000	3.30194	6.7491	1.46251
1	Deaths	179	Ethiopia	3	Both	10	25 to 29	627	Rheumatoid arthritis	3	1	Number	2000	3.81425	8.2404	1.5724
1	Deaths	179	Ethiopia	3	Both	11	30 to 34	627	Rheumatoid arthritis	3	1	Number	2000	3.80396	8.3606	1.42151
1	Deaths	179	Ethiopia	3	Both	12	35 to 39	627	Rheumatoid arthritis	3	1	Number	2000	4.34503	8.81698	1.70089
1	Deaths	179	Ethiopia	3	Both	13	40 to 44	627	Rheumatoid arthritis	3	1	Number	2000	6.93549	12.7523	3.25177
1	Deaths	179	Ethiopia	3	Both	14	45 to 49	627	Rheumatoid arthritis	3	1	Number	2000	9.90633	16.3227	5.04128
1	Deaths	179	Ethiopia	3	Both	15	50 to 54	627	Rheumatoid arthritis	3	1	Number	2000	14.1164	21.8734	8.02862
1	Deaths	179	Ethiopia	3	Both	16	55 to 59	627	Rheumatoid arthritis	3	1	Number	2000	18.0302	27.1293	10.8185
1	Deaths	179	Ethiopia	3	Both	17	60 to 64	627	Rheumatoid arthritis	3	1	Number	2000	20.2486	30.6506	11.9306
1	Deaths	179	Ethiopia	3	Both	18	65 to 69	627	Rheumatoid arthritis	3	1	Number	2000	24.681	37.6959	14.3237
1	Deaths	179	Ethiopia	3	Both	19	70 to 74	627	Rheumatoid arthritis	3	1	Number	2000	22.1805	33.7256	12.5559
1	Deaths	179	Ethiopia	3	Both	20	75 to 79	627	Rheumatoid arthritis	3	1	Number	2000	22.4454	34.7614	11.6259
1	Deaths	179	Ethiopia	3	Both	22	All Ages	627	Rheumatoid arthritis	3	1	Number	2000	187.11	251.936	115.144
1	Deaths	179	Ethiopia	3	Both	23	5-14 years	627	Rheumatoid arthritis	3	1	Number	2000	8.84826	16.4839	3.17095
1	Deaths	179	Ethiopia	3	Both	24	15-49 years	627	Rheumatoid arthritis	3	1	Number	2000	35.8704	62.4048	19.2247
1	Deaths	179	Ethiopia	3	Both	25	50-69 years	627	Rheumatoid arthritis	3	1	Number	2000	77.0762	108.859	47.0161
1	Deaths	179	Ethiopia	3	Both	26	70+ years	627	Rheumatoid arthritis	3	1	Number	2000	65.3149	96.8318	36.4993
1	Deaths	179	Ethiopia	3	Both	30	80 to 84	627	Rheumatoid arthritis	3	1	Number	2000	13.1302	22.2308	6.20671
1	Deaths	179	Ethiopia	3	Both	31	85 to 89	627	Rheumatoid arthritis	3	1	Number	2000	5.58613	10.0368	2.46463
1	Deaths	179	Ethiopia	3	Both	32	90 to 94	627	Rheumatoid arthritis	3	1	Number	2000	1.63244	3.13826	0.645599
1	Deaths	179	Ethiopia	3	Both	158	<20 years	627	Rheumatoid arthritis	3	1	Number	2000	12.6117	22.7495	5.16087
1	Deaths	179	Ethiopia	3	Both	159	10 to 24	627	Rheumatoid arthritis	3	1	Number	2000	11.8708	21.1802	5.4392
1	Deaths	179	Ethiopia	3	Both	169	10 to 54	627	Rheumatoid arthritis	3	1	Number	2000	54.7923	86.0158	31.7657
1	Deaths	179	Ethiopia	3	Both	235	95 plus	627	Rheumatoid arthritis	3	1	Number	2000	0.340268	0.692233	0.126285
1	Deaths	179	Ethiopia	3	Both	6	5 to 9	639	Other musculoskeletal disorders	3	1	Number	2000	9.14933	18.0347	4.18969
1	Deaths	179	Ethiopia	3	Both	7	10 to 14	639	Other musculoskeletal disorders	3	1	Number	2000	15.2493	26.5671	8.44146
1	Deaths	179	Ethiopia	3	Both	8	15 to 19	639	Other musculoskeletal disorders	3	1	Number	2000	21.4095	35.1517	12.1511
1	Deaths	179	Ethiopia	3	Both	9	20 to 24	639	Other musculoskeletal disorders	3	1	Number	2000	21.0501	35.1148	12.0671
1	Deaths	179	Ethiopia	3	Both	10	25 to 29	639	Other musculoskeletal disorders	3	1	Number	2000	20.6943	35.9623	11.1617
1	Deaths	179	Ethiopia	3	Both	11	30 to 34	639	Other musculoskeletal disorders	3	1	Number	2000	19.6971	32.9925	10.6461
1	Deaths	179	Ethiopia	3	Both	12	35 to 39	639	Other musculoskeletal disorders	3	1	Number	2000	18.2144	31.4647	9.90718
1	Deaths	179	Ethiopia	3	Both	13	40 to 44	639	Other musculoskeletal disorders	3	1	Number	2000	17.603	29.8743	9.19291
1	Deaths	179	Ethiopia	3	Both	14	45 to 49	639	Other musculoskeletal disorders	3	1	Number	2000	15.4251	27.375	7.97981
1	Deaths	179	Ethiopia	3	Both	15	50 to 54	639	Other musculoskeletal disorders	3	1	Number	2000	11.8879	22.2296	5.41302
1	Deaths	179	Ethiopia	3	Both	16	55 to 59	639	Other musculoskeletal disorders	3	1	Number	2000	10.4168	20.5263	4.68761
1	Deaths	179	Ethiopia	3	Both	17	60 to 64	639	Other musculoskeletal disorders	3	1	Number	2000	9.23761	18.9247	3.82091
1	Deaths	179	Ethiopia	3	Both	18	65 to 69	639	Other musculoskeletal disorders	3	1	Number	2000	9.46406	19.3305	3.96835
1	Deaths	179	Ethiopia	3	Both	19	70 to 74	639	Other musculoskeletal disorders	3	1	Number	2000	7.65382	15.7641	3.11937
1	Deaths	179	Ethiopia	3	Both	20	75 to 79	639	Other musculoskeletal disorders	3	1	Number	2000	7.75502	16.0452	2.98823
1	Deaths	179	Ethiopia	3	Both	22	All Ages	639	Other musculoskeletal disorders	3	1	Number	2000	225.222	352.562	135.034
1	Deaths	179	Ethiopia	3	Both	23	5-14 years	639	Other musculoskeletal disorders	3	1	Number	2000	24.3986	42.7167	13.0965
1	Deaths	179	Ethiopia	3	Both	24	15-49 years	639	Other musculoskeletal disorders	3	1	Number	2000	134.094	212.247	77.5898
1	Deaths	179	Ethiopia	3	Both	25	50-69 years	639	Other musculoskeletal disorders	3	1	Number	2000	41.0064	75.7223	19.8045
1	Deaths	179	Ethiopia	3	Both	26	70+ years	639	Other musculoskeletal disorders	3	1	Number	2000	25.7233	53.8692	11.1068
1	Deaths	179	Ethiopia	3	Both	30	80 to 84	639	Other musculoskeletal disorders	3	1	Number	2000	5.89522	13.8162	2.07932
1	Deaths	179	Ethiopia	3	Both	31	85 to 89	639	Other musculoskeletal disorders	3	1	Number	2000	3.13755	7.47039	1.06656
1	Deaths	179	Ethiopia	3	Both	32	90 to 94	639	Other musculoskeletal disorders	3	1	Number	2000	1.06575	2.78844	0.32131
1	Deaths	179	Ethiopia	3	Both	158	<20 years	639	Other musculoskeletal disorders	3	1	Number	2000	45.8081	74.2356	27.9466
1	Deaths	179	Ethiopia	3	Both	159	10 to 24	639	Other musculoskeletal disorders	3	1	Number	2000	57.7089	90.7704	34.9952
1	Deaths	179	Ethiopia	3	Both	169	10 to 54	639	Other musculoskeletal disorders	3	1	Number	2000	161.231	253.508	93.6553
1	Deaths	179	Ethiopia	3	Both	235	95 plus	639	Other musculoskeletal disorders	3	1	Number	2000	0.215985	0.550883	0.0627892
1	Deaths	179	Ethiopia	3	Both	1	Under 5	640	Other non-communicable diseases	2	1	Number	2000	4954.7	8679.4	1623.8
1	Deaths	179	Ethiopia	3	Both	2	Early Neonatal	640	Other non-communicable diseases	2	1	Number	2000	1156.2	2406.93	262.316
1	Deaths	179	Ethiopia	3	Both	3	Late Neonatal	640	Other non-communicable diseases	2	1	Number	2000	740.03	1438.81	183.736
1	Deaths	179	Ethiopia	3	Both	4	Post Neonatal	640	Other non-communicable diseases	2	1	Number	2000	2566.38	4453.76	950.079
1	Deaths	179	Ethiopia	3	Both	5	1 to 4	640	Other non-communicable diseases	2	1	Number	2000	492.091	1044.11	152.041
1	Deaths	179	Ethiopia	3	Both	6	5 to 9	640	Other non-communicable diseases	2	1	Number	2000	54.2258	113.532	14.2187
1	Deaths	179	Ethiopia	3	Both	7	10 to 14	640	Other non-communicable diseases	2	1	Number	2000	51.5131	100.167	17.3642
1	Deaths	179	Ethiopia	3	Both	8	15 to 19	640	Other non-communicable diseases	2	1	Number	2000	100.835	163.913	45.6369
1	Deaths	179	Ethiopia	3	Both	9	20 to 24	640	Other non-communicable diseases	2	1	Number	2000	57.3812	90.7992	26.2054
1	Deaths	179	Ethiopia	3	Both	10	25 to 29	640	Other non-communicable diseases	2	1	Number	2000	38.5617	63.5535	16.3795
1	Deaths	179	Ethiopia	3	Both	11	30 to 34	640	Other non-communicable diseases	2	1	Number	2000	58.7054	91.864	29.4303
1	Deaths	179	Ethiopia	3	Both	12	35 to 39	640	Other non-communicable diseases	2	1	Number	2000	25.8895	42.903	13.1008
1	Deaths	179	Ethiopia	3	Both	13	40 to 44	640	Other non-communicable diseases	2	1	Number	2000	39.8052	62.3817	21.678
1	Deaths	179	Ethiopia	3	Both	14	45 to 49	640	Other non-communicable diseases	2	1	Number	2000	91.7844	144.504	48.0673
1	Deaths	179	Ethiopia	3	Both	15	50 to 54	640	Other non-communicable diseases	2	1	Number	2000	86.66	141.231	50.0557
1	Deaths	179	Ethiopia	3	Both	16	55 to 59	640	Other non-communicable diseases	2	1	Number	2000	146.853	238.43	84.7143
1	Deaths	179	Ethiopia	3	Both	17	60 to 64	640	Other non-communicable diseases	2	1	Number	2000	80.7756	126.588	45.6851
1	Deaths	179	Ethiopia	3	Both	18	65 to 69	640	Other non-communicable diseases	2	1	Number	2000	146.169	234.661	86.5434
1	Deaths	179	Ethiopia	3	Both	19	70 to 74	640	Other non-communicable diseases	2	1	Number	2000	108.932	178.428	62.3594
1	Deaths	179	Ethiopia	3	Both	20	75 to 79	640	Other non-communicable diseases	2	1	Number	2000	207.681	341.814	112.307
1	Deaths	179	Ethiopia	3	Both	22	All Ages	640	Other non-communicable diseases	2	1	Number	2000	6396.99	10320.8	2738.67
1	Deaths	179	Ethiopia	3	Both	23	5-14 years	640	Other non-communicable diseases	2	1	Number	2000	105.739	204.239	33.0946
1	Deaths	179	Ethiopia	3	Both	24	15-49 years	640	Other non-communicable diseases	2	1	Number	2000	412.962	590.653	205.075
1	Deaths	179	Ethiopia	3	Both	25	50-69 years	640	Other non-communicable diseases	2	1	Number	2000	460.458	705.549	271.017
1	Deaths	179	Ethiopia	3	Both	26	70+ years	640	Other non-communicable diseases	2	1	Number	2000	463.134	702.674	262.156
1	Deaths	179	Ethiopia	3	Both	28	<1 year	640	Other non-communicable diseases	2	1	Number	2000	4462.61	7925.02	1417.52
1	Deaths	179	Ethiopia	3	Both	30	80 to 84	640	Other non-communicable diseases	2	1	Number	2000	81.6489	127.909	44.2891
1	Deaths	179	Ethiopia	3	Both	31	85 to 89	640	Other non-communicable diseases	2	1	Number	2000	41.9956	65.2056	23.7843
1	Deaths	179	Ethiopia	3	Both	32	90 to 94	640	Other non-communicable diseases	2	1	Number	2000	16.5255	26.1069	9.585
1	Deaths	179	Ethiopia	3	Both	158	<20 years	640	Other non-communicable diseases	2	1	Number	2000	5161.27	9039.47	1728.53
1	Deaths	179	Ethiopia	3	Both	159	10 to 24	640	Other non-communicable diseases	2	1	Number	2000	209.729	333.822	89.4705
1	Deaths	179	Ethiopia	3	Both	169	10 to 54	640	Other non-communicable diseases	2	1	Number	2000	551.135	805.385	289.922
1	Deaths	179	Ethiopia	3	Both	235	95 plus	640	Other non-communicable diseases	2	1	Number	2000	6.35074	10.8534	3.34353
1	Deaths	179	Ethiopia	3	Both	1	Under 5	641	Congenital birth defects	3	1	Number	2000	3576.3	6964.34	876.438
1	Deaths	179	Ethiopia	3	Both	2	Early Neonatal	641	Congenital birth defects	3	1	Number	2000	1156.2	2406.93	262.316
1	Deaths	179	Ethiopia	3	Both	3	Late Neonatal	641	Congenital birth defects	3	1	Number	2000	609.414	1258.49	138.111
1	Deaths	179	Ethiopia	3	Both	4	Post Neonatal	641	Congenital birth defects	3	1	Number	2000	1435.93	2998.77	312
1	Deaths	179	Ethiopia	3	Both	5	1 to 4	641	Congenital birth defects	3	1	Number	2000	374.755	901.272	80.7477
1	Deaths	179	Ethiopia	3	Both	6	5 to 9	641	Congenital birth defects	3	1	Number	2000	51.4674	111.117	12.4286
1	Deaths	179	Ethiopia	3	Both	7	10 to 14	641	Congenital birth defects	3	1	Number	2000	44.179	91.4771	11.9144
1	Deaths	179	Ethiopia	3	Both	8	15 to 19	641	Congenital birth defects	3	1	Number	2000	36.0003	72.406	9.26061
1	Deaths	179	Ethiopia	3	Both	9	20 to 24	641	Congenital birth defects	3	1	Number	2000	28.4886	56.8694	7.4405
1	Deaths	179	Ethiopia	3	Both	10	25 to 29	641	Congenital birth defects	3	1	Number	2000	24.2506	48.5366	6.39795
1	Deaths	179	Ethiopia	3	Both	11	30 to 34	641	Congenital birth defects	3	1	Number	2000	13.557	26.6028	3.5301
1	Deaths	179	Ethiopia	3	Both	12	35 to 39	641	Congenital birth defects	3	1	Number	2000	10.1722	20.1789	2.5437
1	Deaths	179	Ethiopia	3	Both	13	40 to 44	641	Congenital birth defects	3	1	Number	2000	10.4376	19.9957	2.63181
1	Deaths	179	Ethiopia	3	Both	14	45 to 49	641	Congenital birth defects	3	1	Number	2000	5.46499	10.3972	1.33866
1	Deaths	179	Ethiopia	3	Both	15	50 to 54	641	Congenital birth defects	3	1	Number	2000	4.99767	9.57673	1.22896
1	Deaths	179	Ethiopia	3	Both	16	55 to 59	641	Congenital birth defects	3	1	Number	2000	5.12644	9.89958	1.26675
1	Deaths	179	Ethiopia	3	Both	17	60 to 64	641	Congenital birth defects	3	1	Number	2000	3.79889	7.06679	0.899769
1	Deaths	179	Ethiopia	3	Both	18	65 to 69	641	Congenital birth defects	3	1	Number	2000	2.98101	5.48829	0.703956
1	Deaths	179	Ethiopia	3	Both	22	All Ages	641	Congenital birth defects	3	1	Number	2000	3817.22	7330.08	955.354
1	Deaths	179	Ethiopia	3	Both	23	5-14 years	641	Congenital birth defects	3	1	Number	2000	95.6464	194.251	24.9304
1	Deaths	179	Ethiopia	3	Both	24	15-49 years	641	Congenital birth defects	3	1	Number	2000	128.371	241.514	34.9966
1	Deaths	179	Ethiopia	3	Both	25	50-69 years	641	Congenital birth defects	3	1	Number	2000	16.904	30.4811	4.19919
1	Deaths	179	Ethiopia	3	Both	28	<1 year	641	Congenital birth defects	3	1	Number	2000	3201.55	6269.97	730.625
1	Deaths	179	Ethiopia	3	Both	158	<20 years	641	Congenital birth defects	3	1	Number	2000	3707.95	7169.49	920.605
1	Deaths	179	Ethiopia	3	Both	159	10 to 24	641	Congenital birth defects	3	1	Number	2000	108.668	209.142	29.8009
1	Deaths	179	Ethiopia	3	Both	169	10 to 54	641	Congenital birth defects	3	1	Number	2000	177.548	333.018	48.8659
1	Deaths	179	Ethiopia	3	Both	1	Under 5	642	Neural tube defects	4	1	Number	2000	1357.6	3563.01	283.916
1	Deaths	179	Ethiopia	3	Both	2	Early Neonatal	642	Neural tube defects	4	1	Number	2000	552.757	1481.45	98.9028
1	Deaths	179	Ethiopia	3	Both	3	Late Neonatal	642	Neural tube defects	4	1	Number	2000	239.309	654.7	46.614
1	Deaths	179	Ethiopia	3	Both	4	Post Neonatal	642	Neural tube defects	4	1	Number	2000	470.958	1418.8	82.228
1	Deaths	179	Ethiopia	3	Both	5	1 to 4	642	Neural tube defects	4	1	Number	2000	94.579	308.247	15.3104
1	Deaths	179	Ethiopia	3	Both	6	5 to 9	642	Neural tube defects	4	1	Number	2000	11.4541	36.1814	2.11596
1	Deaths	179	Ethiopia	3	Both	7	10 to 14	642	Neural tube defects	4	1	Number	2000	9.26038	25.9744	1.76444
1	Deaths	179	Ethiopia	3	Both	8	15 to 19	642	Neural tube defects	4	1	Number	2000	5.93749	18.4992	1.03708
1	Deaths	179	Ethiopia	3	Both	9	20 to 24	642	Neural tube defects	4	1	Number	2000	4.0699	12.3234	0.674134
1	Deaths	179	Ethiopia	3	Both	10	25 to 29	642	Neural tube defects	4	1	Number	2000	2.76985	9.42682	0.408509
1	Deaths	179	Ethiopia	3	Both	11	30 to 34	642	Neural tube defects	4	1	Number	2000	1.73698	5.81886	0.275034
1	Deaths	179	Ethiopia	3	Both	12	35 to 39	642	Neural tube defects	4	1	Number	2000	0.905651	2.98441	0.133331
1	Deaths	179	Ethiopia	3	Both	13	40 to 44	642	Neural tube defects	4	1	Number	2000	1.05933	3.45927	0.168022
1	Deaths	179	Ethiopia	3	Both	14	45 to 49	642	Neural tube defects	4	1	Number	2000	0.610763	2.19965	0.0922119
1	Deaths	179	Ethiopia	3	Both	15	50 to 54	642	Neural tube defects	4	1	Number	2000	0.484701	1.68746	0.0664152
1	Deaths	179	Ethiopia	3	Both	16	55 to 59	642	Neural tube defects	4	1	Number	2000	0.526439	1.86049	0.0837339
1	Deaths	179	Ethiopia	3	Both	17	60 to 64	642	Neural tube defects	4	1	Number	2000	0.341448	1.37783	0.0477694
1	Deaths	179	Ethiopia	3	Both	18	65 to 69	642	Neural tube defects	4	1	Number	2000	0.307592	1.10044	0.0450253
1	Deaths	179	Ethiopia	3	Both	22	All Ages	642	Neural tube defects	4	1	Number	2000	1397.07	3658.31	292.914
1	Deaths	179	Ethiopia	3	Both	23	5-14 years	642	Neural tube defects	4	1	Number	2000	20.7145	59.898	4.12269
1	Deaths	179	Ethiopia	3	Both	24	15-49 years	642	Neural tube defects	4	1	Number	2000	17.09	52.9679	3.12569
1	Deaths	179	Ethiopia	3	Both	25	50-69 years	642	Neural tube defects	4	1	Number	2000	1.66018	6.11555	0.269671
1	Deaths	179	Ethiopia	3	Both	28	<1 year	642	Neural tube defects	4	1	Number	2000	1263.02	3232.87	258.274
1	Deaths	179	Ethiopia	3	Both	158	<20 years	642	Neural tube defects	4	1	Number	2000	1384.25	3625.9	291.08
1	Deaths	179	Ethiopia	3	Both	159	10 to 24	642	Neural tube defects	4	1	Number	2000	19.2678	53.8173	3.70238
1	Deaths	179	Ethiopia	3	Both	169	10 to 54	642	Neural tube defects	4	1	Number	2000	26.835	77.9943	5.22428
1	Deaths	179	Ethiopia	3	Both	1	Under 5	643	Congenital heart anomalies	4	1	Number	2000	777.925	1868.89	186.502
1	Deaths	179	Ethiopia	3	Both	2	Early Neonatal	643	Congenital heart anomalies	4	1	Number	2000	164.016	443.381	32.6468
1	Deaths	179	Ethiopia	3	Both	3	Late Neonatal	643	Congenital heart anomalies	4	1	Number	2000	141.507	363.027	31.9003
1	Deaths	179	Ethiopia	3	Both	4	Post Neonatal	643	Congenital heart anomalies	4	1	Number	2000	377.889	947.607	75.6466
1	Deaths	179	Ethiopia	3	Both	5	1 to 4	643	Congenital heart anomalies	4	1	Number	2000	94.5123	324.678	13.5525
1	Deaths	179	Ethiopia	3	Both	6	5 to 9	643	Congenital heart anomalies	4	1	Number	2000	18.4725	44.7237	4.08915
1	Deaths	179	Ethiopia	3	Both	7	10 to 14	643	Congenital heart anomalies	4	1	Number	2000	17.9876	38.3039	5.19627
1	Deaths	179	Ethiopia	3	Both	8	15 to 19	643	Congenital heart anomalies	4	1	Number	2000	15.9401	33.255	4.5065
1	Deaths	179	Ethiopia	3	Both	9	20 to 24	643	Congenital heart anomalies	4	1	Number	2000	14.7596	29.2978	4.28201
1	Deaths	179	Ethiopia	3	Both	10	25 to 29	643	Congenital heart anomalies	4	1	Number	2000	13.1529	27.5643	3.72604
1	Deaths	179	Ethiopia	3	Both	11	30 to 34	643	Congenital heart anomalies	4	1	Number	2000	6.84468	13.9103	1.95673
1	Deaths	179	Ethiopia	3	Both	12	35 to 39	643	Congenital heart anomalies	4	1	Number	2000	5.55076	11.2621	1.57119
1	Deaths	179	Ethiopia	3	Both	13	40 to 44	643	Congenital heart anomalies	4	1	Number	2000	5.8994	11.3107	1.58795
1	Deaths	179	Ethiopia	3	Both	14	45 to 49	643	Congenital heart anomalies	4	1	Number	2000	1.89681	3.5238	0.510747
1	Deaths	179	Ethiopia	3	Both	15	50 to 54	643	Congenital heart anomalies	4	1	Number	2000	1.65116	3.15092	0.437214
1	Deaths	179	Ethiopia	3	Both	16	55 to 59	643	Congenital heart anomalies	4	1	Number	2000	1.59201	3.11305	0.41107
1	Deaths	179	Ethiopia	3	Both	17	60 to 64	643	Congenital heart anomalies	4	1	Number	2000	1.14195	2.18572	0.289085
1	Deaths	179	Ethiopia	3	Both	18	65 to 69	643	Congenital heart anomalies	4	1	Number	2000	0.823702	1.60117	0.196792
1	Deaths	179	Ethiopia	3	Both	22	All Ages	643	Congenital heart anomalies	4	1	Number	2000	883.639	2042.63	219.163
1	Deaths	179	Ethiopia	3	Both	23	5-14 years	643	Congenital heart anomalies	4	1	Number	2000	36.4602	80.1159	9.78529
1	Deaths	179	Ethiopia	3	Both	24	15-49 years	643	Congenital heart anomalies	4	1	Number	2000	64.0442	119.842	18.9257
1	Deaths	179	Ethiopia	3	Both	25	50-69 years	643	Congenital heart anomalies	4	1	Number	2000	5.20881	9.37256	1.38682
1	Deaths	179	Ethiopia	3	Both	28	<1 year	643	Congenital heart anomalies	4	1	Number	2000	683.413	1599.78	157.085
1	Deaths	179	Ethiopia	3	Both	158	<20 years	643	Congenital heart anomalies	4	1	Number	2000	830.326	1952.44	203.758
1	Deaths	179	Ethiopia	3	Both	159	10 to 24	643	Congenital heart anomalies	4	1	Number	2000	48.6873	93.7593	14.7185
1	Deaths	179	Ethiopia	3	Both	169	10 to 54	643	Congenital heart anomalies	4	1	Number	2000	83.683	160.492	25.3182
1	Deaths	179	Ethiopia	3	Both	1	Under 5	644	Orofacial clefts	4	1	Number	2000	40.3525	139.982	2.89039
1	Deaths	179	Ethiopia	3	Both	2	Early Neonatal	644	Orofacial clefts	4	1	Number	2000	12.6781	55.3817	0.81886
1	Deaths	179	Ethiopia	3	Both	3	Late Neonatal	644	Orofacial clefts	4	1	Number	2000	9.68987	38.1348	0.517934
1	Deaths	179	Ethiopia	3	Both	4	Post Neonatal	644	Orofacial clefts	4	1	Number	2000	17.0377	71.7354	1.10832
1	Deaths	179	Ethiopia	3	Both	5	1 to 4	644	Orofacial clefts	4	1	Number	2000	0.946784	5.00288	0.0444242
1	Deaths	179	Ethiopia	3	Both	22	All Ages	644	Orofacial clefts	4	1	Number	2000	40.3525	139.982	2.89039
1	Deaths	179	Ethiopia	3	Both	28	<1 year	644	Orofacial clefts	4	1	Number	2000	39.4057	138.14	2.81442
1	Deaths	179	Ethiopia	3	Both	158	<20 years	644	Orofacial clefts	4	1	Number	2000	40.3525	139.982	2.89039
1	Deaths	179	Ethiopia	3	Both	1	Under 5	645	Down syndrome	4	1	Number	2000	62.1896	276.03	8.21313
1	Deaths	179	Ethiopia	3	Both	2	Early Neonatal	645	Down syndrome	4	1	Number	2000	8.593	33.2153	1.5422
1	Deaths	179	Ethiopia	3	Both	3	Late Neonatal	645	Down syndrome	4	1	Number	2000	7.19456	29.0177	1.10974
1	Deaths	179	Ethiopia	3	Both	4	Post Neonatal	645	Down syndrome	4	1	Number	2000	31.5752	136.953	4.31531
1	Deaths	179	Ethiopia	3	Both	5	1 to 4	645	Down syndrome	4	1	Number	2000	14.8268	91.8093	0.71062
1	Deaths	179	Ethiopia	3	Both	6	5 to 9	645	Down syndrome	4	1	Number	2000	1.24968	5.40999	0.155543
1	Deaths	179	Ethiopia	3	Both	7	10 to 14	645	Down syndrome	4	1	Number	2000	1.00896	3.42458	0.162144
1	Deaths	179	Ethiopia	3	Both	8	15 to 19	645	Down syndrome	4	1	Number	2000	1.37474	4.0095	0.307016
1	Deaths	179	Ethiopia	3	Both	9	20 to 24	645	Down syndrome	4	1	Number	2000	1.25707	3.72874	0.274116
1	Deaths	179	Ethiopia	3	Both	10	25 to 29	645	Down syndrome	4	1	Number	2000	1.23651	3.64943	0.26453
1	Deaths	179	Ethiopia	3	Both	11	30 to 34	645	Down syndrome	4	1	Number	2000	0.98549	2.82696	0.210882
1	Deaths	179	Ethiopia	3	Both	12	35 to 39	645	Down syndrome	4	1	Number	2000	0.787187	2.10385	0.164222
1	Deaths	179	Ethiopia	3	Both	13	40 to 44	645	Down syndrome	4	1	Number	2000	0.861461	2.30814	0.185999
1	Deaths	179	Ethiopia	3	Both	14	45 to 49	645	Down syndrome	4	1	Number	2000	0.881348	2.19181	0.204412
1	Deaths	179	Ethiopia	3	Both	15	50 to 54	645	Down syndrome	4	1	Number	2000	0.869208	2.10357	0.206014
1	Deaths	179	Ethiopia	3	Both	16	55 to 59	645	Down syndrome	4	1	Number	2000	0.782646	1.98827	0.184826
1	Deaths	179	Ethiopia	3	Both	17	60 to 64	645	Down syndrome	4	1	Number	2000	0.434739	1.08483	0.110274
1	Deaths	179	Ethiopia	3	Both	18	65 to 69	645	Down syndrome	4	1	Number	2000	0.17604	0.436497	0.042415
1	Deaths	179	Ethiopia	3	Both	22	All Ages	645	Down syndrome	4	1	Number	2000	74.0946	296.146	10.696
1	Deaths	179	Ethiopia	3	Both	23	5-14 years	645	Down syndrome	4	1	Number	2000	2.25863	8.16576	0.346774
1	Deaths	179	Ethiopia	3	Both	24	15-49 years	645	Down syndrome	4	1	Number	2000	7.38381	19.2256	1.67107
1	Deaths	179	Ethiopia	3	Both	25	50-69 years	645	Down syndrome	4	1	Number	2000	2.26263	5.28769	0.556652
1	Deaths	179	Ethiopia	3	Both	28	<1 year	645	Down syndrome	4	1	Number	2000	47.3628	192.208	7.281
1	Deaths	179	Ethiopia	3	Both	158	<20 years	645	Down syndrome	4	1	Number	2000	65.8229	284.045	8.94377
1	Deaths	179	Ethiopia	3	Both	159	10 to 24	645	Down syndrome	4	1	Number	2000	3.64077	10.2749	0.785232
1	Deaths	179	Ethiopia	3	Both	169	10 to 54	645	Down syndrome	4	1	Number	2000	9.26197	24.767	2.05904
1	Deaths	179	Ethiopia	3	Both	1	Under 5	648	Other chromosomal abnormalities	4	1	Number	2000	111.886	329.794	9.53888
1	Deaths	179	Ethiopia	3	Both	2	Early Neonatal	648	Other chromosomal abnormalities	4	1	Number	2000	30.9649	113.262	1.99205
1	Deaths	179	Ethiopia	3	Both	3	Late Neonatal	648	Other chromosomal abnormalities	4	1	Number	2000	25.093	77.9939	2.08148
1	Deaths	179	Ethiopia	3	Both	4	Post Neonatal	648	Other chromosomal abnormalities	4	1	Number	2000	50.675	164.688	3.59022
1	Deaths	179	Ethiopia	3	Both	5	1 to 4	648	Other chromosomal abnormalities	4	1	Number	2000	5.15354	23.7797	0.298855
1	Deaths	179	Ethiopia	3	Both	6	5 to 9	648	Other chromosomal abnormalities	4	1	Number	2000	0.892372	3.11429	0.0709193
1	Deaths	179	Ethiopia	3	Both	7	10 to 14	648	Other chromosomal abnormalities	4	1	Number	2000	0.793281	2.90026	0.0621537
1	Deaths	179	Ethiopia	3	Both	8	15 to 19	648	Other chromosomal abnormalities	4	1	Number	2000	0.80251	3.02262	0.0640135
1	Deaths	179	Ethiopia	3	Both	9	20 to 24	648	Other chromosomal abnormalities	4	1	Number	2000	0.442374	1.74093	0.0230113
1	Deaths	179	Ethiopia	3	Both	10	25 to 29	648	Other chromosomal abnormalities	4	1	Number	2000	0.423187	1.53285	0.0284584
1	Deaths	179	Ethiopia	3	Both	11	30 to 34	648	Other chromosomal abnormalities	4	1	Number	2000	0.144432	0.505802	0.00986583
1	Deaths	179	Ethiopia	3	Both	12	35 to 39	648	Other chromosomal abnormalities	4	1	Number	2000	0.072099	0.276957	0.00412414
1	Deaths	179	Ethiopia	3	Both	13	40 to 44	648	Other chromosomal abnormalities	4	1	Number	2000	0.078503	0.25752	0.00543173
1	Deaths	179	Ethiopia	3	Both	14	45 to 49	648	Other chromosomal abnormalities	4	1	Number	2000	0.0458468	0.171041	0.00281977
1	Deaths	179	Ethiopia	3	Both	15	50 to 54	648	Other chromosomal abnormalities	4	1	Number	2000	0.0557447	0.196799	0.00362495
1	Deaths	179	Ethiopia	3	Both	16	55 to 59	648	Other chromosomal abnormalities	4	1	Number	2000	0.0695538	0.243451	0.00460901
1	Deaths	179	Ethiopia	3	Both	17	60 to 64	648	Other chromosomal abnormalities	4	1	Number	2000	0.0219751	0.0732905	0.00144379
1	Deaths	179	Ethiopia	3	Both	18	65 to 69	648	Other chromosomal abnormalities	4	1	Number	2000	0.0216015	0.0703867	0.00136218
1	Deaths	179	Ethiopia	3	Both	22	All Ages	648	Other chromosomal abnormalities	4	1	Number	2000	115.75	338.722	10.1628
1	Deaths	179	Ethiopia	3	Both	23	5-14 years	648	Other chromosomal abnormalities	4	1	Number	2000	1.68565	5.45905	0.145083
1	Deaths	179	Ethiopia	3	Both	24	15-49 years	648	Other chromosomal abnormalities	4	1	Number	2000	2.00895	6.10141	0.152102
1	Deaths	179	Ethiopia	3	Both	25	50-69 years	648	Other chromosomal abnormalities	4	1	Number	2000	0.168875	0.513278	0.0105184
1	Deaths	179	Ethiopia	3	Both	28	<1 year	648	Other chromosomal abnormalities	4	1	Number	2000	106.733	314.2	9.15984
1	Deaths	179	Ethiopia	3	Both	158	<20 years	648	Other chromosomal abnormalities	4	1	Number	2000	114.375	335.768	10.0288
1	Deaths	179	Ethiopia	3	Both	159	10 to 24	648	Other chromosomal abnormalities	4	1	Number	2000	2.03817	6.27885	0.15794
1	Deaths	179	Ethiopia	3	Both	169	10 to 54	648	Other chromosomal abnormalities	4	1	Number	2000	2.85798	8.46009	0.234988
1	Deaths	179	Ethiopia	3	Both	1	Under 5	649	Congenital musculoskeletal and limb anomalies	4	1	Number	2000	25.5171	75.6252	5.72685
1	Deaths	179	Ethiopia	3	Both	2	Early Neonatal	649	Congenital musculoskeletal and limb anomalies	4	1	Number	2000	10.6477	30.562	2.20595
1	Deaths	179	Ethiopia	3	Both	3	Late Neonatal	649	Congenital musculoskeletal and limb anomalies	4	1	Number	2000	4.06593	11.7076	0.894221
1	Deaths	179	Ethiopia	3	Both	4	Post Neonatal	649	Congenital musculoskeletal and limb anomalies	4	1	Number	2000	8.64304	27.2568	1.62941
1	Deaths	179	Ethiopia	3	Both	5	1 to 4	649	Congenital musculoskeletal and limb anomalies	4	1	Number	2000	2.16045	14.0334	0.150686
1	Deaths	179	Ethiopia	3	Both	6	5 to 9	649	Congenital musculoskeletal and limb anomalies	4	1	Number	2000	0.39031	1.27546	0.0643271
1	Deaths	179	Ethiopia	3	Both	7	10 to 14	649	Congenital musculoskeletal and limb anomalies	4	1	Number	2000	0.351388	1.08784	0.0745556
1	Deaths	179	Ethiopia	3	Both	8	15 to 19	649	Congenital musculoskeletal and limb anomalies	4	1	Number	2000	0.34037	0.887488	0.0783003
1	Deaths	179	Ethiopia	3	Both	9	20 to 24	649	Congenital musculoskeletal and limb anomalies	4	1	Number	2000	0.164727	0.419039	0.0387476
1	Deaths	179	Ethiopia	3	Both	10	25 to 29	649	Congenital musculoskeletal and limb anomalies	4	1	Number	2000	0.137217	0.351333	0.0339605
1	Deaths	179	Ethiopia	3	Both	11	30 to 34	649	Congenital musculoskeletal and limb anomalies	4	1	Number	2000	0.074173	0.196444	0.017476
1	Deaths	179	Ethiopia	3	Both	12	35 to 39	649	Congenital musculoskeletal and limb anomalies	4	1	Number	2000	0.0480203	0.124566	0.0112707
1	Deaths	179	Ethiopia	3	Both	13	40 to 44	649	Congenital musculoskeletal and limb anomalies	4	1	Number	2000	0.0421613	0.113594	0.0100534
1	Deaths	179	Ethiopia	3	Both	14	45 to 49	649	Congenital musculoskeletal and limb anomalies	4	1	Number	2000	0.0314732	0.0840953	0.00775286
1	Deaths	179	Ethiopia	3	Both	15	50 to 54	649	Congenital musculoskeletal and limb anomalies	4	1	Number	2000	0.0357319	0.10022	0.00857487
1	Deaths	179	Ethiopia	3	Both	16	55 to 59	649	Congenital musculoskeletal and limb anomalies	4	1	Number	2000	0.0314069	0.0850199	0.0070538
1	Deaths	179	Ethiopia	3	Both	17	60 to 64	649	Congenital musculoskeletal and limb anomalies	4	1	Number	2000	0.0208644	0.0539831	0.00508596
1	Deaths	179	Ethiopia	3	Both	18	65 to 69	649	Congenital musculoskeletal and limb anomalies	4	1	Number	2000	0.021137	0.0592794	0.0046778
1	Deaths	179	Ethiopia	3	Both	22	All Ages	649	Congenital musculoskeletal and limb anomalies	4	1	Number	2000	27.2061	79.1473	6.20335
1	Deaths	179	Ethiopia	3	Both	23	5-14 years	649	Congenital musculoskeletal and limb anomalies	4	1	Number	2000	0.741698	2.13964	0.153732
1	Deaths	179	Ethiopia	3	Both	24	15-49 years	649	Congenital musculoskeletal and limb anomalies	4	1	Number	2000	0.838143	1.92064	0.240306
1	Deaths	179	Ethiopia	3	Both	25	50-69 years	649	Congenital musculoskeletal and limb anomalies	4	1	Number	2000	0.10914	0.247853	0.0307368
1	Deaths	179	Ethiopia	3	Both	28	<1 year	649	Congenital musculoskeletal and limb anomalies	4	1	Number	2000	23.3566	63.0863	5.29491
1	Deaths	179	Ethiopia	3	Both	158	<20 years	649	Congenital musculoskeletal and limb anomalies	4	1	Number	2000	26.5992	78.3104	6.05437
1	Deaths	179	Ethiopia	3	Both	159	10 to 24	649	Congenital musculoskeletal and limb anomalies	4	1	Number	2000	0.856485	2.11718	0.230188
1	Deaths	179	Ethiopia	3	Both	169	10 to 54	649	Congenital musculoskeletal and limb anomalies	4	1	Number	2000	1.22526	2.8628	0.359662
1	Deaths	179	Ethiopia	3	Both	1	Under 5	650	Urogenital congenital anomalies	4	1	Number	2000	51.2119	116.762	11.5402
1	Deaths	179	Ethiopia	3	Both	2	Early Neonatal	650	Urogenital congenital anomalies	4	1	Number	2000	23.8772	63.7858	4.71474
1	Deaths	179	Ethiopia	3	Both	3	Late Neonatal	650	Urogenital congenital anomalies	4	1	Number	2000	10.5167	24.1823	1.99142
1	Deaths	179	Ethiopia	3	Both	4	Post Neonatal	650	Urogenital congenital anomalies	4	1	Number	2000	14.2273	37.4176	2.62138
1	Deaths	179	Ethiopia	3	Both	5	1 to 4	650	Urogenital congenital anomalies	4	1	Number	2000	2.59064	7.86673	0.368985
1	Deaths	179	Ethiopia	3	Both	6	5 to 9	650	Urogenital congenital anomalies	4	1	Number	2000	0.861577	2.50468	0.148809
1	Deaths	179	Ethiopia	3	Both	7	10 to 14	650	Urogenital congenital anomalies	4	1	Number	2000	1.02954	2.67603	0.213106
1	Deaths	179	Ethiopia	3	Both	8	15 to 19	650	Urogenital congenital anomalies	4	1	Number	2000	0.549331	1.42232	0.118545
1	Deaths	179	Ethiopia	3	Both	9	20 to 24	650	Urogenital congenital anomalies	4	1	Number	2000	0.518583	1.40003	0.116684
1	Deaths	179	Ethiopia	3	Both	10	25 to 29	650	Urogenital congenital anomalies	4	1	Number	2000	0.462508	1.22418	0.0966023
1	Deaths	179	Ethiopia	3	Both	11	30 to 34	650	Urogenital congenital anomalies	4	1	Number	2000	0.30506	0.712003	0.0663819
1	Deaths	179	Ethiopia	3	Both	12	35 to 39	650	Urogenital congenital anomalies	4	1	Number	2000	0.303343	0.753169	0.0640305
1	Deaths	179	Ethiopia	3	Both	13	40 to 44	650	Urogenital congenital anomalies	4	1	Number	2000	0.38552	0.946237	0.0823406
1	Deaths	179	Ethiopia	3	Both	14	45 to 49	650	Urogenital congenital anomalies	4	1	Number	2000	0.348318	0.75813	0.0758267
1	Deaths	179	Ethiopia	3	Both	15	50 to 54	650	Urogenital congenital anomalies	4	1	Number	2000	0.473107	1.10878	0.103616
1	Deaths	179	Ethiopia	3	Both	16	55 to 59	650	Urogenital congenital anomalies	4	1	Number	2000	0.632219	1.3985	0.14414
1	Deaths	179	Ethiopia	3	Both	17	60 to 64	650	Urogenital congenital anomalies	4	1	Number	2000	0.621389	1.35639	0.132903
1	Deaths	179	Ethiopia	3	Both	18	65 to 69	650	Urogenital congenital anomalies	4	1	Number	2000	0.725484	1.55999	0.164291
1	Deaths	179	Ethiopia	3	Both	22	All Ages	650	Urogenital congenital anomalies	4	1	Number	2000	58.4279	129.445	13.3317
1	Deaths	179	Ethiopia	3	Both	23	5-14 years	650	Urogenital congenital anomalies	4	1	Number	2000	1.89112	4.61744	0.39839
1	Deaths	179	Ethiopia	3	Both	24	15-49 years	650	Urogenital congenital anomalies	4	1	Number	2000	2.87266	6.53709	0.694339
1	Deaths	179	Ethiopia	3	Both	25	50-69 years	650	Urogenital congenital anomalies	4	1	Number	2000	2.4522	5.1708	0.574672
1	Deaths	179	Ethiopia	3	Both	28	<1 year	650	Urogenital congenital anomalies	4	1	Number	2000	48.6213	111.526	10.747
1	Deaths	179	Ethiopia	3	Both	158	<20 years	650	Urogenital congenital anomalies	4	1	Number	2000	53.6524	121.022	12.2052
1	Deaths	179	Ethiopia	3	Both	159	10 to 24	650	Urogenital congenital anomalies	4	1	Number	2000	2.09746	4.94496	0.493864
1	Deaths	179	Ethiopia	3	Both	169	10 to 54	650	Urogenital congenital anomalies	4	1	Number	2000	4.37531	9.74176	1.03433
1	Deaths	179	Ethiopia	3	Both	1	Under 5	651	Digestive congenital anomalies	4	1	Number	2000	225.232	578.273	64.0444
1	Deaths	179	Ethiopia	3	Both	2	Early Neonatal	651	Digestive congenital anomalies	4	1	Number	2000	71.6015	194.281	16.6011
1	Deaths	179	Ethiopia	3	Both	3	Late Neonatal	651	Digestive congenital anomalies	4	1	Number	2000	45.8021	125.014	11.7614
1	Deaths	179	Ethiopia	3	Both	4	Post Neonatal	651	Digestive congenital anomalies	4	1	Number	2000	93.3296	256.408	23.3856
1	Deaths	179	Ethiopia	3	Both	5	1 to 4	651	Digestive congenital anomalies	4	1	Number	2000	14.4993	77.8089	2.33436
1	Deaths	179	Ethiopia	3	Both	6	5 to 9	651	Digestive congenital anomalies	4	1	Number	2000	1.02017	3.26546	0.234401
1	Deaths	179	Ethiopia	3	Both	7	10 to 14	651	Digestive congenital anomalies	4	1	Number	2000	0.650567	1.63619	0.158515
1	Deaths	179	Ethiopia	3	Both	8	15 to 19	651	Digestive congenital anomalies	4	1	Number	2000	0.48891	1.14673	0.103885
1	Deaths	179	Ethiopia	3	Both	9	20 to 24	651	Digestive congenital anomalies	4	1	Number	2000	0.308744	0.723164	0.0610949
1	Deaths	179	Ethiopia	3	Both	10	25 to 29	651	Digestive congenital anomalies	4	1	Number	2000	0.218522	0.549066	0.0438232
1	Deaths	179	Ethiopia	3	Both	11	30 to 34	651	Digestive congenital anomalies	4	1	Number	2000	0.11042	0.258981	0.022877
1	Deaths	179	Ethiopia	3	Both	12	35 to 39	651	Digestive congenital anomalies	4	1	Number	2000	0.0761153	0.188765	0.0153474
1	Deaths	179	Ethiopia	3	Both	13	40 to 44	651	Digestive congenital anomalies	4	1	Number	2000	0.0606791	0.141985	0.011372
1	Deaths	179	Ethiopia	3	Both	14	45 to 49	651	Digestive congenital anomalies	4	1	Number	2000	0.0651644	0.152681	0.0123023
1	Deaths	179	Ethiopia	3	Both	15	50 to 54	651	Digestive congenital anomalies	4	1	Number	2000	0.0859174	0.198639	0.0155182
1	Deaths	179	Ethiopia	3	Both	16	55 to 59	651	Digestive congenital anomalies	4	1	Number	2000	0.100914	0.237067	0.0190424
1	Deaths	179	Ethiopia	3	Both	17	60 to 64	651	Digestive congenital anomalies	4	1	Number	2000	0.11391	0.246727	0.0205342
1	Deaths	179	Ethiopia	3	Both	18	65 to 69	651	Digestive congenital anomalies	4	1	Number	2000	0.0937236	0.210211	0.0161274
1	Deaths	179	Ethiopia	3	Both	22	All Ages	651	Digestive congenital anomalies	4	1	Number	2000	228.626	584.19	65.4201
1	Deaths	179	Ethiopia	3	Both	23	5-14 years	651	Digestive congenital anomalies	4	1	Number	2000	1.67074	4.61202	0.443759
1	Deaths	179	Ethiopia	3	Both	24	15-49 years	651	Digestive congenital anomalies	4	1	Number	2000	1.32855	2.75333	0.305705
1	Deaths	179	Ethiopia	3	Both	25	50-69 years	651	Digestive congenital anomalies	4	1	Number	2000	0.394465	0.824864	0.0794594
1	Deaths	179	Ethiopia	3	Both	28	<1 year	651	Digestive congenital anomalies	4	1	Number	2000	210.733	519.117	59.548
1	Deaths	179	Ethiopia	3	Both	158	<20 years	651	Digestive congenital anomalies	4	1	Number	2000	227.392	582.487	64.9721
1	Deaths	179	Ethiopia	3	Both	159	10 to 24	651	Digestive congenital anomalies	4	1	Number	2000	1.44822	3.10227	0.347089
1	Deaths	179	Ethiopia	3	Both	169	10 to 54	651	Digestive congenital anomalies	4	1	Number	2000	2.06504	4.43399	0.487249
1	Deaths	179	Ethiopia	3	Both	1	Under 5	652	Other congenital birth defects	4	1	Number	2000	924.382	2663.99	156.761
1	Deaths	179	Ethiopia	3	Both	2	Early Neonatal	652	Other congenital birth defects	4	1	Number	2000	281.063	833.421	48.0804
1	Deaths	179	Ethiopia	3	Both	3	Late Neonatal	652	Other congenital birth defects	4	1	Number	2000	126.235	393.471	21.0928
1	Deaths	179	Ethiopia	3	Both	4	Post Neonatal	652	Other congenital birth defects	4	1	Number	2000	371.597	1107.71	50.4352
1	Deaths	179	Ethiopia	3	Both	5	1 to 4	652	Other congenital birth defects	4	1	Number	2000	145.486	502.529	12.1454
1	Deaths	179	Ethiopia	3	Both	6	5 to 9	652	Other congenital birth defects	4	1	Number	2000	17.1267	50.1625	2.83815
1	Deaths	179	Ethiopia	3	Both	7	10 to 14	652	Other congenital birth defects	4	1	Number	2000	13.0973	35.596	2.32838
1	Deaths	179	Ethiopia	3	Both	8	15 to 19	652	Other congenital birth defects	4	1	Number	2000	10.5669	26.7444	1.96145
1	Deaths	179	Ethiopia	3	Both	9	20 to 24	652	Other congenital birth defects	4	1	Number	2000	6.96768	19.5172	1.15952
1	Deaths	179	Ethiopia	3	Both	10	25 to 29	652	Other congenital birth defects	4	1	Number	2000	5.84996	16.2456	0.900992
1	Deaths	179	Ethiopia	3	Both	11	30 to 34	652	Other congenital birth defects	4	1	Number	2000	3.35579	9.16537	0.532068
1	Deaths	179	Ethiopia	3	Both	12	35 to 39	652	Other congenital birth defects	4	1	Number	2000	2.42902	6.46998	0.373171
1	Deaths	179	Ethiopia	3	Both	13	40 to 44	652	Other congenital birth defects	4	1	Number	2000	2.05051	5.44324	0.308423
1	Deaths	179	Ethiopia	3	Both	14	45 to 49	652	Other congenital birth defects	4	1	Number	2000	1.58526	3.9497	0.246739
1	Deaths	179	Ethiopia	3	Both	15	50 to 54	652	Other congenital birth defects	4	1	Number	2000	1.3421	3.36862	0.200149
1	Deaths	179	Ethiopia	3	Both	16	55 to 59	652	Other congenital birth defects	4	1	Number	2000	1.39126	3.43435	0.217141
1	Deaths	179	Ethiopia	3	Both	17	60 to 64	652	Other congenital birth defects	4	1	Number	2000	1.10262	2.60256	0.174804
1	Deaths	179	Ethiopia	3	Both	18	65 to 69	652	Other congenital birth defects	4	1	Number	2000	0.811733	1.82099	0.131928
1	Deaths	179	Ethiopia	3	Both	22	All Ages	652	Other congenital birth defects	4	1	Number	2000	992.058	2826	171.686
1	Deaths	179	Ethiopia	3	Both	23	5-14 years	652	Other congenital birth defects	4	1	Number	2000	30.2239	83.6881	5.58265
1	Deaths	179	Ethiopia	3	Both	24	15-49 years	652	Other congenital birth defects	4	1	Number	2000	32.8051	81.5543	5.79957
1	Deaths	179	Ethiopia	3	Both	25	50-69 years	652	Other congenital birth defects	4	1	Number	2000	4.64771	10.6545	0.748978
1	Deaths	179	Ethiopia	3	Both	28	<1 year	652	Other congenital birth defects	4	1	Number	2000	778.896	2240.29	132.882
1	Deaths	179	Ethiopia	3	Both	158	<20 years	652	Other congenital birth defects	4	1	Number	2000	965.173	2769.94	165.518
1	Deaths	179	Ethiopia	3	Both	159	10 to 24	652	Other congenital birth defects	4	1	Number	2000	30.6318	80.2975	5.79045
1	Deaths	179	Ethiopia	3	Both	169	10 to 54	652	Other congenital birth defects	4	1	Number	2000	47.2445	119.608	8.65103
1	Deaths	179	Ethiopia	3	Both	1	Under 5	653	Skin and subcutaneous diseases	3	1	Number	2000	301.588	505.964	138.068
1	Deaths	179	Ethiopia	3	Both	4	Post Neonatal	653	Skin and subcutaneous diseases	3	1	Number	2000	184.251	327.249	87.8457
1	Deaths	179	Ethiopia	3	Both	5	1 to 4	653	Skin and subcutaneous diseases	3	1	Number	2000	117.336	230.59	44.3129
1	Deaths	179	Ethiopia	3	Both	6	5 to 9	653	Skin and subcutaneous diseases	3	1	Number	2000	2.75839	4.87291	1.27386
1	Deaths	179	Ethiopia	3	Both	7	10 to 14	653	Skin and subcutaneous diseases	3	1	Number	2000	7.33415	13.4413	3.63438
1	Deaths	179	Ethiopia	3	Both	8	15 to 19	653	Skin and subcutaneous diseases	3	1	Number	2000	64.8342	115.853	29.0671
1	Deaths	179	Ethiopia	3	Both	9	20 to 24	653	Skin and subcutaneous diseases	3	1	Number	2000	28.8926	47.1064	14.5498
1	Deaths	179	Ethiopia	3	Both	10	25 to 29	653	Skin and subcutaneous diseases	3	1	Number	2000	14.3111	23.2196	7.5586
1	Deaths	179	Ethiopia	3	Both	11	30 to 34	653	Skin and subcutaneous diseases	3	1	Number	2000	45.1484	75.9274	20.7821
1	Deaths	179	Ethiopia	3	Both	12	35 to 39	653	Skin and subcutaneous diseases	3	1	Number	2000	15.7173	26.8861	8.04485
1	Deaths	179	Ethiopia	3	Both	13	40 to 44	653	Skin and subcutaneous diseases	3	1	Number	2000	29.3676	47.0633	15.2384
1	Deaths	179	Ethiopia	3	Both	14	45 to 49	653	Skin and subcutaneous diseases	3	1	Number	2000	86.3194	137.163	43.7927
1	Deaths	179	Ethiopia	3	Both	15	50 to 54	653	Skin and subcutaneous diseases	3	1	Number	2000	81.6624	133.971	45.9789
1	Deaths	179	Ethiopia	3	Both	16	55 to 59	653	Skin and subcutaneous diseases	3	1	Number	2000	141.727	229.772	79.3534
1	Deaths	179	Ethiopia	3	Both	17	60 to 64	653	Skin and subcutaneous diseases	3	1	Number	2000	76.9768	122.522	43.5153
1	Deaths	179	Ethiopia	3	Both	18	65 to 69	653	Skin and subcutaneous diseases	3	1	Number	2000	143.188	231.706	83.5289
1	Deaths	179	Ethiopia	3	Both	19	70 to 74	653	Skin and subcutaneous diseases	3	1	Number	2000	108.932	178.428	62.3594
1	Deaths	179	Ethiopia	3	Both	20	75 to 79	653	Skin and subcutaneous diseases	3	1	Number	2000	207.681	341.814	112.307
1	Deaths	179	Ethiopia	3	Both	22	All Ages	653	Skin and subcutaneous diseases	3	1	Number	2000	1502.96	2151.93	845.765
1	Deaths	179	Ethiopia	3	Both	23	5-14 years	653	Skin and subcutaneous diseases	3	1	Number	2000	10.0925	17.1423	5.00314
1	Deaths	179	Ethiopia	3	Both	24	15-49 years	653	Skin and subcutaneous diseases	3	1	Number	2000	284.591	402.486	147.082
1	Deaths	179	Ethiopia	3	Both	25	50-69 years	653	Skin and subcutaneous diseases	3	1	Number	2000	443.554	681.033	256.97
1	Deaths	179	Ethiopia	3	Both	26	70+ years	653	Skin and subcutaneous diseases	3	1	Number	2000	463.134	702.674	262.156
1	Deaths	179	Ethiopia	3	Both	28	<1 year	653	Skin and subcutaneous diseases	3	1	Number	2000	184.251	327.249	87.8457
1	Deaths	179	Ethiopia	3	Both	30	80 to 84	653	Skin and subcutaneous diseases	3	1	Number	2000	81.6489	127.909	44.2891
1	Deaths	179	Ethiopia	3	Both	31	85 to 89	653	Skin and subcutaneous diseases	3	1	Number	2000	41.9956	65.2056	23.7843
1	Deaths	179	Ethiopia	3	Both	32	90 to 94	653	Skin and subcutaneous diseases	3	1	Number	2000	16.5255	26.1069	9.585
1	Deaths	179	Ethiopia	3	Both	158	<20 years	653	Skin and subcutaneous diseases	3	1	Number	2000	376.514	609.686	182.094
1	Deaths	179	Ethiopia	3	Both	159	10 to 24	653	Skin and subcutaneous diseases	3	1	Number	2000	101.061	159.854	48.9851
1	Deaths	179	Ethiopia	3	Both	169	10 to 54	653	Skin and subcutaneous diseases	3	1	Number	2000	373.587	530.669	200.639
1	Deaths	179	Ethiopia	3	Both	235	95 plus	653	Skin and subcutaneous diseases	3	1	Number	2000	6.35074	10.8534	3.34353
1	Deaths	179	Ethiopia	3	Both	1	Under 5	656	Cellulitis	4	1	Number	2000	9.68888	26.0657	1.69137
1	Deaths	179	Ethiopia	3	Both	4	Post Neonatal	656	Cellulitis	4	1	Number	2000	3.21742	12.1058	0.48564
1	Deaths	179	Ethiopia	3	Both	5	1 to 4	656	Cellulitis	4	1	Number	2000	6.47146	20.4009	0.985903
1	Deaths	179	Ethiopia	3	Both	6	5 to 9	656	Cellulitis	4	1	Number	2000	0.263664	0.692938	0.0797904
1	Deaths	179	Ethiopia	3	Both	7	10 to 14	656	Cellulitis	4	1	Number	2000	0.825692	2.59935	0.274699
1	Deaths	179	Ethiopia	3	Both	8	15 to 19	656	Cellulitis	4	1	Number	2000	6.56412	16.9214	2.21159
1	Deaths	179	Ethiopia	3	Both	9	20 to 24	656	Cellulitis	4	1	Number	2000	2.24712	4.36328	0.975431
1	Deaths	179	Ethiopia	3	Both	10	25 to 29	656	Cellulitis	4	1	Number	2000	0.844166	1.55484	0.405135
1	Deaths	179	Ethiopia	3	Both	11	30 to 34	656	Cellulitis	4	1	Number	2000	2.13904	4.314	0.808085
1	Deaths	179	Ethiopia	3	Both	12	35 to 39	656	Cellulitis	4	1	Number	2000	0.780862	1.92573	0.232959
1	Deaths	179	Ethiopia	3	Both	13	40 to 44	656	Cellulitis	4	1	Number	2000	1.41332	3.23958	0.350753
1	Deaths	179	Ethiopia	3	Both	14	45 to 49	656	Cellulitis	4	1	Number	2000	4.133	9.34958	1.05206
1	Deaths	179	Ethiopia	3	Both	15	50 to 54	656	Cellulitis	4	1	Number	2000	5.07157	11.2906	1.21942
1	Deaths	179	Ethiopia	3	Both	16	55 to 59	656	Cellulitis	4	1	Number	2000	8.52111	19.1238	2.14734
1	Deaths	179	Ethiopia	3	Both	17	60 to 64	656	Cellulitis	4	1	Number	2000	4.5128	9.09139	1.27848
1	Deaths	179	Ethiopia	3	Both	18	65 to 69	656	Cellulitis	4	1	Number	2000	7.30327	15.9283	2.10765
1	Deaths	179	Ethiopia	3	Both	19	70 to 74	656	Cellulitis	4	1	Number	2000	4.9512	10.9306	1.38783
1	Deaths	179	Ethiopia	3	Both	20	75 to 79	656	Cellulitis	4	1	Number	2000	9.3942	21.6013	2.22657
1	Deaths	179	Ethiopia	3	Both	22	All Ages	656	Cellulitis	4	1	Number	2000	73.9334	122.811	24.7539
1	Deaths	179	Ethiopia	3	Both	23	5-14 years	656	Cellulitis	4	1	Number	2000	1.08936	3.06072	0.36843
1	Deaths	179	Ethiopia	3	Both	24	15-49 years	656	Cellulitis	4	1	Number	2000	18.1216	32.9333	7.01667
1	Deaths	179	Ethiopia	3	Both	25	50-69 years	656	Cellulitis	4	1	Number	2000	25.4088	45.5542	7.36479
1	Deaths	179	Ethiopia	3	Both	26	70+ years	656	Cellulitis	4	1	Number	2000	19.6248	37.7278	5.7175
1	Deaths	179	Ethiopia	3	Both	28	<1 year	656	Cellulitis	4	1	Number	2000	3.21742	12.1058	0.48564
1	Deaths	179	Ethiopia	3	Both	30	80 to 84	656	Cellulitis	4	1	Number	2000	3.15199	6.22982	0.913646
1	Deaths	179	Ethiopia	3	Both	31	85 to 89	656	Cellulitis	4	1	Number	2000	1.35156	2.66489	0.405538
1	Deaths	179	Ethiopia	3	Both	32	90 to 94	656	Cellulitis	4	1	Number	2000	0.56405	1.13913	0.181373
1	Deaths	179	Ethiopia	3	Both	158	<20 years	656	Cellulitis	4	1	Number	2000	17.3424	38.0926	5.11371
1	Deaths	179	Ethiopia	3	Both	159	10 to 24	656	Cellulitis	4	1	Number	2000	9.63694	20.5369	3.73157
1	Deaths	179	Ethiopia	3	Both	169	10 to 54	656	Cellulitis	4	1	Number	2000	24.0189	41.6734	8.81593
1	Deaths	179	Ethiopia	3	Both	235	95 plus	656	Cellulitis	4	1	Number	2000	0.211766	0.483364	0.0590469
1	Deaths	179	Ethiopia	3	Both	1	Under 5	657	Pyoderma	4	1	Number	2000	266.244	458.246	126.548
1	Deaths	179	Ethiopia	3	Both	4	Post Neonatal	657	Pyoderma	4	1	Number	2000	174.46	315.314	82.4393
1	Deaths	179	Ethiopia	3	Both	5	1 to 4	657	Pyoderma	4	1	Number	2000	91.7843	179.029	35.2721
1	Deaths	179	Ethiopia	3	Both	6	5 to 9	657	Pyoderma	4	1	Number	2000	1.79883	3.33808	0.767437
1	Deaths	179	Ethiopia	3	Both	7	10 to 14	657	Pyoderma	4	1	Number	2000	4.79447	8.81726	2.30885
1	Deaths	179	Ethiopia	3	Both	8	15 to 19	657	Pyoderma	4	1	Number	2000	45.6143	84.8238	20.0333
1	Deaths	179	Ethiopia	3	Both	9	20 to 24	657	Pyoderma	4	1	Number	2000	21.665	36.0154	10.8007
1	Deaths	179	Ethiopia	3	Both	10	25 to 29	657	Pyoderma	4	1	Number	2000	11.3445	18.9161	5.88497
1	Deaths	179	Ethiopia	3	Both	11	30 to 34	657	Pyoderma	4	1	Number	2000	37.2203	63.9792	16.852
1	Deaths	179	Ethiopia	3	Both	12	35 to 39	657	Pyoderma	4	1	Number	2000	12.5513	21.8648	6.27595
1	Deaths	179	Ethiopia	3	Both	13	40 to 44	657	Pyoderma	4	1	Number	2000	22.9565	37.0866	12.1659
1	Deaths	179	Ethiopia	3	Both	14	45 to 49	657	Pyoderma	4	1	Number	2000	66.4961	109.744	32.809
1	Deaths	179	Ethiopia	3	Both	15	50 to 54	657	Pyoderma	4	1	Number	2000	58.801	103.165	31.2307
1	Deaths	179	Ethiopia	3	Both	16	55 to 59	657	Pyoderma	4	1	Number	2000	102.984	170.364	55.6048
1	Deaths	179	Ethiopia	3	Both	17	60 to 64	657	Pyoderma	4	1	Number	2000	53.9715	89.7046	29.037
1	Deaths	179	Ethiopia	3	Both	18	65 to 69	657	Pyoderma	4	1	Number	2000	93.4187	160.369	50.1144
1	Deaths	179	Ethiopia	3	Both	19	70 to 74	657	Pyoderma	4	1	Number	2000	65.9408	108.823	33.0694
1	Deaths	179	Ethiopia	3	Both	20	75 to 79	657	Pyoderma	4	1	Number	2000	120.348	210.964	58.774
1	Deaths	179	Ethiopia	3	Both	22	All Ages	657	Pyoderma	4	1	Number	2000	1065.7	1551.44	597.037
1	Deaths	179	Ethiopia	3	Both	23	5-14 years	657	Pyoderma	4	1	Number	2000	6.5933	10.9542	3.28828
1	Deaths	179	Ethiopia	3	Both	24	15-49 years	657	Pyoderma	4	1	Number	2000	217.848	309.288	111.985
1	Deaths	179	Ethiopia	3	Both	25	50-69 years	657	Pyoderma	4	1	Number	2000	309.175	502.005	174.119
1	Deaths	179	Ethiopia	3	Both	26	70+ years	657	Pyoderma	4	1	Number	2000	265.834	422.233	140.065
1	Deaths	179	Ethiopia	3	Both	28	<1 year	657	Pyoderma	4	1	Number	2000	174.46	315.314	82.4393
1	Deaths	179	Ethiopia	3	Both	30	80 to 84	657	Pyoderma	4	1	Number	2000	43.9123	74.7392	20.3525
1	Deaths	179	Ethiopia	3	Both	31	85 to 89	657	Pyoderma	4	1	Number	2000	22.5918	39.6169	11.4801
1	Deaths	179	Ethiopia	3	Both	32	90 to 94	657	Pyoderma	4	1	Number	2000	9.21463	15.9906	4.70517
1	Deaths	179	Ethiopia	3	Both	158	<20 years	657	Pyoderma	4	1	Number	2000	318.452	526.139	156.861
1	Deaths	179	Ethiopia	3	Both	159	10 to 24	657	Pyoderma	4	1	Number	2000	72.0739	117.33	35.5118
1	Deaths	179	Ethiopia	3	Both	169	10 to 54	657	Pyoderma	4	1	Number	2000	281.443	405.873	150.764
1	Deaths	179	Ethiopia	3	Both	235	95 plus	657	Pyoderma	4	1	Number	2000	3.82608	7.0715	1.75917
1	Deaths	179	Ethiopia	3	Both	1	Under 5	665	Decubitus ulcer	4	1	Number	2000	8.34581	30.1564	1.07289
1	Deaths	179	Ethiopia	3	Both	5	1 to 4	665	Decubitus ulcer	4	1	Number	2000	8.34581	30.1564	1.07289
1	Deaths	179	Ethiopia	3	Both	6	5 to 9	665	Decubitus ulcer	4	1	Number	2000	0.429409	1.04254	0.113863
1	Deaths	179	Ethiopia	3	Both	7	10 to 14	665	Decubitus ulcer	4	1	Number	2000	0.958973	2.49416	0.339798
1	Deaths	179	Ethiopia	3	Both	8	15 to 19	665	Decubitus ulcer	4	1	Number	2000	7.38305	16.793	2.60019
1	Deaths	179	Ethiopia	3	Both	9	20 to 24	665	Decubitus ulcer	4	1	Number	2000	2.81959	6.08843	1.07362
1	Deaths	179	Ethiopia	3	Both	10	25 to 29	665	Decubitus ulcer	4	1	Number	2000	1.2907	3.0776	0.485259
1	Deaths	179	Ethiopia	3	Both	11	30 to 34	665	Decubitus ulcer	4	1	Number	2000	3.79081	9.88514	1.12816
1	Deaths	179	Ethiopia	3	Both	12	35 to 39	665	Decubitus ulcer	4	1	Number	2000	1.69383	4.53627	0.437521
1	Deaths	179	Ethiopia	3	Both	13	40 to 44	665	Decubitus ulcer	4	1	Number	2000	3.48986	9.26011	0.847743
1	Deaths	179	Ethiopia	3	Both	14	45 to 49	665	Decubitus ulcer	4	1	Number	2000	13.5422	33.1514	3.89708
1	Deaths	179	Ethiopia	3	Both	15	50 to 54	665	Decubitus ulcer	4	1	Number	2000	15.4706	36.3253	4.71109
1	Deaths	179	Ethiopia	3	Both	16	55 to 59	665	Decubitus ulcer	4	1	Number	2000	26.2325	63.0628	8.93176
1	Deaths	179	Ethiopia	3	Both	17	60 to 64	665	Decubitus ulcer	4	1	Number	2000	16.4915	38.5811	6.10851
1	Deaths	179	Ethiopia	3	Both	18	65 to 69	665	Decubitus ulcer	4	1	Number	2000	38.8122	84.9757	15.352
1	Deaths	179	Ethiopia	3	Both	19	70 to 74	665	Decubitus ulcer	4	1	Number	2000	35.6117	71.5085	15.9878
1	Deaths	179	Ethiopia	3	Both	20	75 to 79	665	Decubitus ulcer	4	1	Number	2000	73.1834	150.127	26.9316
1	Deaths	179	Ethiopia	3	Both	22	All Ages	665	Decubitus ulcer	4	1	Number	2000	308.787	565.276	144.9
1	Deaths	179	Ethiopia	3	Both	158	<20 years	474	Bladder cancer	3	1	Number	2000	1.90203	3.41997	1.09965
1	Deaths	179	Ethiopia	3	Both	159	10 to 24	474	Bladder cancer	3	1	Number	2000	6.00736	8.31058	4.25326
1	Deaths	179	Ethiopia	3	Both	169	10 to 54	474	Bladder cancer	3	1	Number	2000	120.638	156.026	88.3555
1	Deaths	179	Ethiopia	3	Both	235	95 plus	474	Bladder cancer	3	1	Number	2000	1.38898	1.74103	1.09066
1	Deaths	179	Ethiopia	3	Both	1	Under 5	477	Brain and nervous system cancer	3	1	Number	2000	47.9491	72.0597	27.5049
1	Deaths	179	Ethiopia	3	Both	2	Early Neonatal	477	Brain and nervous system cancer	3	1	Number	2000	0.748352	1.19332	0.483962
1	Deaths	179	Ethiopia	3	Both	3	Late Neonatal	477	Brain and nervous system cancer	3	1	Number	2000	0.607599	1.02247	0.383139
1	Deaths	179	Ethiopia	3	Both	4	Post Neonatal	477	Brain and nervous system cancer	3	1	Number	2000	7.19832	12.0934	4.27579
1	Deaths	179	Ethiopia	3	Both	5	1 to 4	477	Brain and nervous system cancer	3	1	Number	2000	39.3948	63.0282	20.5173
1	Deaths	179	Ethiopia	3	Both	6	5 to 9	477	Brain and nervous system cancer	3	1	Number	2000	42.9204	62.9162	25.1146
1	Deaths	179	Ethiopia	3	Both	7	10 to 14	477	Brain and nervous system cancer	3	1	Number	2000	42.7564	59.8641	28.2742
1	Deaths	179	Ethiopia	3	Both	8	15 to 19	477	Brain and nervous system cancer	3	1	Number	2000	24.526	32.8216	17.4128
1	Deaths	179	Ethiopia	3	Both	9	20 to 24	477	Brain and nervous system cancer	3	1	Number	2000	21.9778	30.362	15.349
1	Deaths	179	Ethiopia	3	Both	10	25 to 29	477	Brain and nervous system cancer	3	1	Number	2000	19.8367	26.7952	13.9031
1	Deaths	179	Ethiopia	3	Both	11	30 to 34	477	Brain and nervous system cancer	3	1	Number	2000	27.3111	37.5139	19.7034
1	Deaths	179	Ethiopia	3	Both	12	35 to 39	477	Brain and nervous system cancer	3	1	Number	2000	29.6422	40.4203	20.7762
1	Deaths	179	Ethiopia	3	Both	13	40 to 44	477	Brain and nervous system cancer	3	1	Number	2000	38.7719	55.6627	26.3106
1	Deaths	179	Ethiopia	3	Both	14	45 to 49	477	Brain and nervous system cancer	3	1	Number	2000	44.6255	62.6685	30.9067
1	Deaths	179	Ethiopia	3	Both	15	50 to 54	477	Brain and nervous system cancer	3	1	Number	2000	57.5881	78.2701	41.4323
1	Deaths	179	Ethiopia	3	Both	16	55 to 59	477	Brain and nervous system cancer	3	1	Number	2000	63.7878	85.8558	45.2542
1	Deaths	179	Ethiopia	3	Both	17	60 to 64	477	Brain and nervous system cancer	3	1	Number	2000	70.158	92.2868	51.3173
1	Deaths	179	Ethiopia	3	Both	18	65 to 69	477	Brain and nervous system cancer	3	1	Number	2000	62.9474	82.3448	45.2677
1	Deaths	179	Ethiopia	3	Both	19	70 to 74	477	Brain and nervous system cancer	3	1	Number	2000	45.8097	61.2139	33.449
1	Deaths	179	Ethiopia	3	Both	20	75 to 79	477	Brain and nervous system cancer	3	1	Number	2000	32.9598	46.143	23.3026
1	Deaths	179	Ethiopia	3	Both	22	All Ages	477	Brain and nervous system cancer	3	1	Number	2000	696.374	848.23	596.756
1	Deaths	179	Ethiopia	3	Both	23	5-14 years	477	Brain and nervous system cancer	3	1	Number	2000	85.6769	116.179	58.511
1	Deaths	179	Ethiopia	3	Both	24	15-49 years	477	Brain and nervous system cancer	3	1	Number	2000	206.691	261.716	168.558
1	Deaths	179	Ethiopia	3	Both	25	50-69 years	477	Brain and nervous system cancer	3	1	Number	2000	254.481	316.801	199.586
1	Deaths	179	Ethiopia	3	Both	26	70+ years	477	Brain and nervous system cancer	3	1	Number	2000	101.575	126.959	78.5726
1	Deaths	179	Ethiopia	3	Both	28	<1 year	477	Brain and nervous system cancer	3	1	Number	2000	8.55427	13.5741	5.5182
1	Deaths	179	Ethiopia	3	Both	30	80 to 84	477	Brain and nervous system cancer	3	1	Number	2000	16.3106	22.1577	11.3699
1	Deaths	179	Ethiopia	3	Both	31	85 to 89	477	Brain and nervous system cancer	3	1	Number	2000	5.1374	7.38751	3.54706
1	Deaths	179	Ethiopia	3	Both	32	90 to 94	477	Brain and nervous system cancer	3	1	Number	2000	1.21437	1.89918	0.742808
1	Deaths	179	Ethiopia	3	Both	158	<20 years	477	Brain and nervous system cancer	3	1	Number	2000	158.152	206.654	112.491
1	Deaths	179	Ethiopia	3	Both	159	10 to 24	477	Brain and nervous system cancer	3	1	Number	2000	89.2602	113.524	68.8562
1	Deaths	179	Ethiopia	3	Both	169	10 to 54	477	Brain and nervous system cancer	3	1	Number	2000	307.036	386.386	251.528
1	Deaths	179	Ethiopia	3	Both	235	95 plus	477	Brain and nervous system cancer	3	1	Number	2000	0.143468	0.23911	0.0873754
1	Deaths	179	Ethiopia	3	Both	7	10 to 14	480	Thyroid cancer	3	1	Number	2000	3.92118	7.18557	1.78905
1	Deaths	179	Ethiopia	3	Both	8	15 to 19	480	Thyroid cancer	3	1	Number	2000	2.88401	4.6067	1.46709
1	Deaths	179	Ethiopia	3	Both	9	20 to 24	480	Thyroid cancer	3	1	Number	2000	11.2344	17.0135	5.97968
1	Deaths	179	Ethiopia	3	Both	10	25 to 29	480	Thyroid cancer	3	1	Number	2000	12.8828	18.2842	6.92521
1	Deaths	179	Ethiopia	3	Both	11	30 to 34	480	Thyroid cancer	3	1	Number	2000	18.7737	28.1268	10.0684
1	Deaths	179	Ethiopia	3	Both	12	35 to 39	480	Thyroid cancer	3	1	Number	2000	22.8481	37.9049	11.2508
1	Deaths	179	Ethiopia	3	Both	13	40 to 44	480	Thyroid cancer	3	1	Number	2000	39.3214	61.1292	19.5552
1	Deaths	179	Ethiopia	3	Both	14	45 to 49	480	Thyroid cancer	3	1	Number	2000	71.2606	110.991	36.4598
1	Deaths	179	Ethiopia	3	Both	15	50 to 54	480	Thyroid cancer	3	1	Number	2000	87.6816	133.79	43.5436
1	Deaths	179	Ethiopia	3	Both	16	55 to 59	480	Thyroid cancer	3	1	Number	2000	112.446	169.002	58.1617
1	Deaths	179	Ethiopia	3	Both	17	60 to 64	480	Thyroid cancer	3	1	Number	2000	70.5722	100.362	38.6957
1	Deaths	179	Ethiopia	3	Both	18	65 to 69	480	Thyroid cancer	3	1	Number	2000	66.4408	95.6035	37.1656
1	Deaths	179	Ethiopia	3	Both	19	70 to 74	480	Thyroid cancer	3	1	Number	2000	55.9853	76.4383	31.1051
1	Deaths	179	Ethiopia	3	Both	20	75 to 79	480	Thyroid cancer	3	1	Number	2000	22.6169	32.7618	12.8085
1	Deaths	179	Ethiopia	3	Both	22	All Ages	480	Thyroid cancer	3	1	Number	2000	631.851	803.415	334.1
1	Deaths	179	Ethiopia	3	Both	23	5-14 years	480	Thyroid cancer	3	1	Number	2000	3.92118	7.18557	1.78905
1	Deaths	179	Ethiopia	3	Both	24	15-49 years	480	Thyroid cancer	3	1	Number	2000	179.205	242.457	94.3198
1	Deaths	179	Ethiopia	3	Both	25	50-69 years	480	Thyroid cancer	3	1	Number	2000	337.141	444.866	177.695
1	Deaths	179	Ethiopia	3	Both	26	70+ years	480	Thyroid cancer	3	1	Number	2000	111.584	142.724	62.7065
1	Deaths	179	Ethiopia	3	Both	30	80 to 84	480	Thyroid cancer	3	1	Number	2000	23.5154	33.0843	13.1938
1	Deaths	179	Ethiopia	3	Both	31	85 to 89	480	Thyroid cancer	3	1	Number	2000	7.67513	10.3922	4.47742
1	Deaths	179	Ethiopia	3	Both	32	90 to 94	480	Thyroid cancer	3	1	Number	2000	1.56109	2.16749	0.912938
1	Deaths	179	Ethiopia	3	Both	158	<20 years	480	Thyroid cancer	3	1	Number	2000	6.80519	10.8517	3.4795
1	Deaths	179	Ethiopia	3	Both	159	10 to 24	480	Thyroid cancer	3	1	Number	2000	18.0396	25.4006	9.51845
1	Deaths	179	Ethiopia	3	Both	169	10 to 54	480	Thyroid cancer	3	1	Number	2000	270.808	360.77	141.443
1	Deaths	179	Ethiopia	3	Both	235	95 plus	480	Thyroid cancer	3	1	Number	2000	0.230154	0.328427	0.134874
1	Deaths	179	Ethiopia	3	Both	8	15 to 19	483	Mesothelioma	3	1	Number	2000	1.25771	1.97983	0.834352
1	Deaths	179	Ethiopia	3	Both	9	20 to 24	483	Mesothelioma	3	1	Number	2000	1.30327	2.16718	0.768379
1	Deaths	179	Ethiopia	3	Both	10	25 to 29	483	Mesothelioma	3	1	Number	2000	1.95943	3.24508	1.15172
1	Deaths	179	Ethiopia	3	Both	11	30 to 34	483	Mesothelioma	3	1	Number	2000	2.38638	4.07418	1.389
1	Deaths	179	Ethiopia	3	Both	12	35 to 39	483	Mesothelioma	3	1	Number	2000	3.27057	5.63462	1.84851
1	Deaths	179	Ethiopia	3	Both	13	40 to 44	483	Mesothelioma	3	1	Number	2000	5.23559	8.78518	3.03909
1	Deaths	179	Ethiopia	3	Both	14	45 to 49	483	Mesothelioma	3	1	Number	2000	6.68101	11.0869	3.96697
1	Deaths	179	Ethiopia	3	Both	15	50 to 54	483	Mesothelioma	3	1	Number	2000	9.65612	15.7235	5.3975
1	Deaths	179	Ethiopia	3	Both	16	55 to 59	483	Mesothelioma	3	1	Number	2000	13.8745	22.1429	8.07058
1	Deaths	179	Ethiopia	3	Both	17	60 to 64	483	Mesothelioma	3	1	Number	2000	15.736	25.9522	9.35572
1	Deaths	179	Ethiopia	3	Both	18	65 to 69	483	Mesothelioma	3	1	Number	2000	12.639	19.7858	7.27824
1	Deaths	179	Ethiopia	3	Both	19	70 to 74	483	Mesothelioma	3	1	Number	2000	11.8441	19.0217	6.89003
1	Deaths	179	Ethiopia	3	Both	20	75 to 79	483	Mesothelioma	3	1	Number	2000	6.01303	10.2915	2.86694
1	Deaths	179	Ethiopia	3	Both	22	All Ages	483	Mesothelioma	3	1	Number	2000	97.0684	142.109	60.4249
1	Deaths	179	Ethiopia	3	Both	24	15-49 years	483	Mesothelioma	3	1	Number	2000	22.094	34.1516	14.0373
1	Deaths	179	Ethiopia	3	Both	25	50-69 years	483	Mesothelioma	3	1	Number	2000	51.9057	78.4918	32.2324
1	Deaths	179	Ethiopia	3	Both	26	70+ years	483	Mesothelioma	3	1	Number	2000	23.0688	33.5971	12.4672
1	Deaths	179	Ethiopia	3	Both	30	80 to 84	483	Mesothelioma	3	1	Number	2000	3.6442	6.30379	1.46989
1	Deaths	179	Ethiopia	3	Both	31	85 to 89	483	Mesothelioma	3	1	Number	2000	1.31573	2.34182	0.485612
1	Deaths	179	Ethiopia	3	Both	32	90 to 94	483	Mesothelioma	3	1	Number	2000	0.216836	0.39334	0.0802043
1	Deaths	179	Ethiopia	3	Both	158	<20 years	483	Mesothelioma	3	1	Number	2000	1.25771	1.97983	0.834352
1	Deaths	179	Ethiopia	3	Both	159	10 to 24	483	Mesothelioma	3	1	Number	2000	2.56098	3.95205	1.6871
1	Deaths	179	Ethiopia	3	Both	169	10 to 54	483	Mesothelioma	3	1	Number	2000	31.7501	49.0844	20.3116
1	Deaths	179	Ethiopia	3	Both	235	95 plus	483	Mesothelioma	3	1	Number	2000	0.0348368	0.0619598	0.0131081
1	Deaths	179	Ethiopia	3	Both	1	Under 5	484	Hodgkin lymphoma	3	1	Number	2000	16.477	33.9489	7.39913
1	Deaths	179	Ethiopia	3	Both	2	Early Neonatal	484	Hodgkin lymphoma	3	1	Number	2000	0.0949315	0.164249	0.0500531
1	Deaths	179	Ethiopia	3	Both	3	Late Neonatal	484	Hodgkin lymphoma	3	1	Number	2000	0.0151295	0.0240145	0.0100922
1	Deaths	179	Ethiopia	3	Both	4	Post Neonatal	484	Hodgkin lymphoma	3	1	Number	2000	0.86092	1.77745	0.404816
1	Deaths	179	Ethiopia	3	Both	5	1 to 4	484	Hodgkin lymphoma	3	1	Number	2000	15.506	32.8277	6.89574
1	Deaths	179	Ethiopia	3	Both	6	5 to 9	484	Hodgkin lymphoma	3	1	Number	2000	37.212	91.4064	13.5524
1	Deaths	179	Ethiopia	3	Both	7	10 to 14	484	Hodgkin lymphoma	3	1	Number	2000	66.2444	121.509	32.8249
1	Deaths	179	Ethiopia	3	Both	8	15 to 19	484	Hodgkin lymphoma	3	1	Number	2000	40.4052	70.9768	19.6835
1	Deaths	179	Ethiopia	3	Both	9	20 to 24	484	Hodgkin lymphoma	3	1	Number	2000	24.3076	39.4213	11.7744
1	Deaths	179	Ethiopia	3	Both	10	25 to 29	484	Hodgkin lymphoma	3	1	Number	2000	33.2423	52.8958	16.6763
1	Deaths	179	Ethiopia	3	Both	11	30 to 34	484	Hodgkin lymphoma	3	1	Number	2000	35.5807	59.9597	17.8797
1	Deaths	179	Ethiopia	3	Both	12	35 to 39	484	Hodgkin lymphoma	3	1	Number	2000	42.3434	67.659	21.2288
1	Deaths	179	Ethiopia	3	Both	13	40 to 44	484	Hodgkin lymphoma	3	1	Number	2000	39.9703	64.0649	19.889
1	Deaths	179	Ethiopia	3	Both	14	45 to 49	484	Hodgkin lymphoma	3	1	Number	2000	34.7625	55.3533	17.7837
1	Deaths	179	Ethiopia	3	Both	15	50 to 54	484	Hodgkin lymphoma	3	1	Number	2000	29.9569	48.3884	14.0928
1	Deaths	179	Ethiopia	3	Both	16	55 to 59	484	Hodgkin lymphoma	3	1	Number	2000	49.0153	72.9202	25.1706
1	Deaths	179	Ethiopia	3	Both	17	60 to 64	484	Hodgkin lymphoma	3	1	Number	2000	33.4934	51.3414	16.6177
1	Deaths	179	Ethiopia	3	Both	18	65 to 69	484	Hodgkin lymphoma	3	1	Number	2000	59.9364	89.9912	29.7573
1	Deaths	179	Ethiopia	3	Both	19	70 to 74	484	Hodgkin lymphoma	3	1	Number	2000	30.6626	45.3743	16.2227
1	Deaths	179	Ethiopia	3	Both	20	75 to 79	484	Hodgkin lymphoma	3	1	Number	2000	4.12499	6.19651	2.07665
1	Deaths	179	Ethiopia	3	Both	22	All Ages	484	Hodgkin lymphoma	3	1	Number	2000	592.553	812.331	309.486
1	Deaths	179	Ethiopia	3	Both	23	5-14 years	484	Hodgkin lymphoma	3	1	Number	2000	103.456	188.586	50.6718
1	Deaths	179	Ethiopia	3	Both	24	15-49 years	484	Hodgkin lymphoma	3	1	Number	2000	250.612	349.13	128.945
1	Deaths	179	Ethiopia	3	Both	25	50-69 years	484	Hodgkin lymphoma	3	1	Number	2000	172.402	238.229	89.2965
1	Deaths	179	Ethiopia	3	Both	26	70+ years	484	Hodgkin lymphoma	3	1	Number	2000	49.6061	69.0054	26.8015
1	Deaths	179	Ethiopia	3	Both	28	<1 year	484	Hodgkin lymphoma	3	1	Number	2000	0.970981	1.91744	0.486285
1	Deaths	179	Ethiopia	3	Both	30	80 to 84	484	Hodgkin lymphoma	3	1	Number	2000	11.1539	17.7917	5.57544
1	Deaths	179	Ethiopia	3	Both	31	85 to 89	484	Hodgkin lymphoma	3	1	Number	2000	3.12443	4.94228	1.63091
1	Deaths	179	Ethiopia	3	Both	32	90 to 94	484	Hodgkin lymphoma	3	1	Number	2000	0.494566	0.774339	0.254236
1	Deaths	179	Ethiopia	3	Both	158	<20 years	484	Hodgkin lymphoma	3	1	Number	2000	160.339	265.961	80.1822
1	Deaths	179	Ethiopia	3	Both	159	10 to 24	484	Hodgkin lymphoma	3	1	Number	2000	130.957	209.648	67.3283
1	Deaths	179	Ethiopia	3	Both	169	10 to 54	484	Hodgkin lymphoma	3	1	Number	2000	346.813	482.608	178.146
1	Deaths	179	Ethiopia	3	Both	235	95 plus	484	Hodgkin lymphoma	3	1	Number	2000	0.0455687	0.0694441	0.0227094
1	Deaths	179	Ethiopia	3	Both	1	Under 5	485	Non-Hodgkin lymphoma	3	1	Number	2000	170.17	284.925	86.6204
1	Deaths	179	Ethiopia	3	Both	2	Early Neonatal	485	Non-Hodgkin lymphoma	3	1	Number	2000	0.831526	1.18209	0.493467
1	Deaths	179	Ethiopia	3	Both	3	Late Neonatal	485	Non-Hodgkin lymphoma	3	1	Number	2000	0.655464	1.09696	0.365708
1	Deaths	179	Ethiopia	3	Both	4	Post Neonatal	485	Non-Hodgkin lymphoma	3	1	Number	2000	13.1709	21.752	6.9749
1	Deaths	179	Ethiopia	3	Both	5	1 to 4	485	Non-Hodgkin lymphoma	3	1	Number	2000	155.512	267.717	76.855
1	Deaths	179	Ethiopia	3	Both	6	5 to 9	485	Non-Hodgkin lymphoma	3	1	Number	2000	283.065	496.324	143.074
1	Deaths	179	Ethiopia	3	Both	7	10 to 14	485	Non-Hodgkin lymphoma	3	1	Number	2000	230.137	386.994	131.686
1	Deaths	179	Ethiopia	3	Both	8	15 to 19	485	Non-Hodgkin lymphoma	3	1	Number	2000	86.4122	131.212	49.307
1	Deaths	179	Ethiopia	3	Both	9	20 to 24	485	Non-Hodgkin lymphoma	3	1	Number	2000	64.9795	100.461	38.2167
1	Deaths	179	Ethiopia	3	Both	10	25 to 29	485	Non-Hodgkin lymphoma	3	1	Number	2000	61.6708	92.8311	36.7892
1	Deaths	179	Ethiopia	3	Both	11	30 to 34	485	Non-Hodgkin lymphoma	3	1	Number	2000	90.0557	132.937	54.4125
1	Deaths	179	Ethiopia	3	Both	12	35 to 39	485	Non-Hodgkin lymphoma	3	1	Number	2000	112.171	158.078	68.2726
1	Deaths	179	Ethiopia	3	Both	13	40 to 44	485	Non-Hodgkin lymphoma	3	1	Number	2000	136.857	190.181	84.4238
1	Deaths	179	Ethiopia	3	Both	14	45 to 49	485	Non-Hodgkin lymphoma	3	1	Number	2000	132.743	189.662	81.8685
1	Deaths	179	Ethiopia	3	Both	15	50 to 54	485	Non-Hodgkin lymphoma	3	1	Number	2000	165.134	224.741	102.164
1	Deaths	179	Ethiopia	3	Both	16	55 to 59	485	Non-Hodgkin lymphoma	3	1	Number	2000	112.036	156.944	67.2036
1	Deaths	179	Ethiopia	3	Both	17	60 to 64	485	Non-Hodgkin lymphoma	3	1	Number	2000	150.339	206.72	94.9942
1	Deaths	179	Ethiopia	3	Both	18	65 to 69	485	Non-Hodgkin lymphoma	3	1	Number	2000	157.254	212.471	96.1838
1	Deaths	179	Ethiopia	3	Both	19	70 to 74	485	Non-Hodgkin lymphoma	3	1	Number	2000	100.175	136.992	62.189
1	Deaths	179	Ethiopia	3	Both	20	75 to 79	485	Non-Hodgkin lymphoma	3	1	Number	2000	33.6877	45.12	22.1621
1	Deaths	179	Ethiopia	3	Both	22	All Ages	485	Non-Hodgkin lymphoma	3	1	Number	2000	2170.92	2756.91	1357.08
1	Deaths	179	Ethiopia	3	Both	23	5-14 years	485	Non-Hodgkin lymphoma	3	1	Number	2000	513.202	787.388	286.48
1	Deaths	179	Ethiopia	3	Both	24	15-49 years	485	Non-Hodgkin lymphoma	3	1	Number	2000	684.889	871.765	422.802
1	Deaths	179	Ethiopia	3	Both	25	50-69 years	485	Non-Hodgkin lymphoma	3	1	Number	2000	584.762	739.714	370.424
1	Deaths	179	Ethiopia	3	Both	26	70+ years	485	Non-Hodgkin lymphoma	3	1	Number	2000	217.894	273.568	141.869
1	Deaths	179	Ethiopia	3	Both	28	<1 year	485	Non-Hodgkin lymphoma	3	1	Number	2000	14.6579	23.343	8.09401
1	Deaths	179	Ethiopia	3	Both	30	80 to 84	485	Non-Hodgkin lymphoma	3	1	Number	2000	57.5703	78.9641	37.1156
1	Deaths	179	Ethiopia	3	Both	31	85 to 89	485	Non-Hodgkin lymphoma	3	1	Number	2000	21.7195	29.4833	13.9468
1	Deaths	179	Ethiopia	3	Both	32	90 to 94	485	Non-Hodgkin lymphoma	3	1	Number	2000	4.19257	5.67732	2.74549
1	Deaths	179	Ethiopia	3	Both	158	<20 years	485	Non-Hodgkin lymphoma	3	1	Number	2000	769.784	1142.03	434.775
1	Deaths	179	Ethiopia	3	Both	159	10 to 24	485	Non-Hodgkin lymphoma	3	1	Number	2000	381.528	562.55	226.503
1	Deaths	179	Ethiopia	3	Both	169	10 to 54	485	Non-Hodgkin lymphoma	3	1	Number	2000	1080.16	1384.48	668.699
1	Deaths	179	Ethiopia	3	Both	235	95 plus	485	Non-Hodgkin lymphoma	3	1	Number	2000	0.549703	0.745231	0.360549
1	Deaths	179	Ethiopia	3	Both	8	15 to 19	486	Multiple myeloma	3	1	Number	2000	3.48798	5.41353	2.03596
1	Deaths	179	Ethiopia	3	Both	9	20 to 24	486	Multiple myeloma	3	1	Number	2000	2.73964	3.8984	1.64567
1	Deaths	179	Ethiopia	3	Both	10	25 to 29	486	Multiple myeloma	3	1	Number	2000	4.08792	5.68827	2.49358
1	Deaths	179	Ethiopia	3	Both	11	30 to 34	486	Multiple myeloma	3	1	Number	2000	10.7672	15.6804	6.44889
1	Deaths	179	Ethiopia	3	Both	12	35 to 39	486	Multiple myeloma	3	1	Number	2000	13.2527	19.4034	7.90847
1	Deaths	179	Ethiopia	3	Both	13	40 to 44	486	Multiple myeloma	3	1	Number	2000	29.452	42.7428	17.87
1	Deaths	179	Ethiopia	3	Both	14	45 to 49	486	Multiple myeloma	3	1	Number	2000	28.773	40.0832	17.7075
1	Deaths	179	Ethiopia	3	Both	15	50 to 54	486	Multiple myeloma	3	1	Number	2000	49.6698	67.0063	30.5559
1	Deaths	179	Ethiopia	3	Both	16	55 to 59	486	Multiple myeloma	3	1	Number	2000	59.8787	81.8719	38.5082
1	Deaths	179	Ethiopia	3	Both	17	60 to 64	486	Multiple myeloma	3	1	Number	2000	87.2173	117.153	54.5
1	Deaths	179	Ethiopia	3	Both	18	65 to 69	486	Multiple myeloma	3	1	Number	2000	102.176	135.581	65.7715
1	Deaths	179	Ethiopia	3	Both	19	70 to 74	486	Multiple myeloma	3	1	Number	2000	48.9899	66.0817	30.5909
1	Deaths	179	Ethiopia	3	Both	20	75 to 79	486	Multiple myeloma	3	1	Number	2000	21.4057	29.3666	13.6598
1	Deaths	179	Ethiopia	3	Both	22	All Ages	486	Multiple myeloma	3	1	Number	2000	478.664	589.033	307.383
1	Deaths	179	Ethiopia	3	Both	24	15-49 years	486	Multiple myeloma	3	1	Number	2000	92.5604	119.539	57.6228
1	Deaths	179	Ethiopia	3	Both	25	50-69 years	486	Multiple myeloma	3	1	Number	2000	298.941	374.539	192.831
1	Deaths	179	Ethiopia	3	Both	26	70+ years	486	Multiple myeloma	3	1	Number	2000	87.1621	111.1	55.4585
1	Deaths	179	Ethiopia	3	Both	30	80 to 84	486	Multiple myeloma	3	1	Number	2000	11.6244	16.1536	7.66123
1	Deaths	179	Ethiopia	3	Both	31	85 to 89	486	Multiple myeloma	3	1	Number	2000	4.02135	5.47172	2.59651
1	Deaths	179	Ethiopia	3	Both	32	90 to 94	486	Multiple myeloma	3	1	Number	2000	0.982685	1.31609	0.608714
1	Deaths	179	Ethiopia	3	Both	158	<20 years	486	Multiple myeloma	3	1	Number	2000	3.48798	5.41353	2.03596
1	Deaths	179	Ethiopia	3	Both	159	10 to 24	486	Multiple myeloma	3	1	Number	2000	6.22762	8.73516	3.72973
1	Deaths	179	Ethiopia	3	Both	169	10 to 54	486	Multiple myeloma	3	1	Number	2000	142.23	183.022	89.7431
1	Deaths	179	Ethiopia	3	Both	235	95 plus	486	Multiple myeloma	3	1	Number	2000	0.137983	0.186234	0.0856297
1	Deaths	179	Ethiopia	3	Both	1	Under 5	487	Leukemia	3	1	Number	2000	75.2072	109.548	46.228
1	Deaths	179	Ethiopia	3	Both	2	Early Neonatal	487	Leukemia	3	1	Number	2000	3.04053	4.54777	1.2796
1	Deaths	179	Ethiopia	3	Both	3	Late Neonatal	487	Leukemia	3	1	Number	2000	2.56465	4.04517	1.22349
1	Deaths	179	Ethiopia	3	Both	4	Post Neonatal	487	Leukemia	3	1	Number	2000	12.5452	20.7521	7.16415
1	Deaths	179	Ethiopia	3	Both	5	1 to 4	487	Leukemia	3	1	Number	2000	57.0569	88.9806	31.1536
1	Deaths	179	Ethiopia	3	Both	6	5 to 9	487	Leukemia	3	1	Number	2000	59.0054	93.8008	33.9162
1	Deaths	179	Ethiopia	3	Both	7	10 to 14	487	Leukemia	3	1	Number	2000	62.4287	89.0324	40.2281
1	Deaths	179	Ethiopia	3	Both	8	15 to 19	487	Leukemia	3	1	Number	2000	70.7488	96.8043	50.9579
1	Deaths	179	Ethiopia	3	Both	9	20 to 24	487	Leukemia	3	1	Number	2000	46.573	63.8043	33.5908
1	Deaths	179	Ethiopia	3	Both	10	25 to 29	487	Leukemia	3	1	Number	2000	40.333	54.5972	29.2734
1	Deaths	179	Ethiopia	3	Both	11	30 to 34	487	Leukemia	3	1	Number	2000	32.1402	42.9811	23.7653
1	Deaths	179	Ethiopia	3	Both	12	35 to 39	487	Leukemia	3	1	Number	2000	37.7458	52.467	27.3399
1	Deaths	179	Ethiopia	3	Both	13	40 to 44	487	Leukemia	3	1	Number	2000	38.4088	51.6809	28.7361
1	Deaths	179	Ethiopia	3	Both	14	45 to 49	487	Leukemia	3	1	Number	2000	48.7521	64.2461	36.2531
1	Deaths	179	Ethiopia	3	Both	15	50 to 54	487	Leukemia	3	1	Number	2000	67.507	88.8088	50.6208
1	Deaths	179	Ethiopia	3	Both	16	55 to 59	487	Leukemia	3	1	Number	2000	79.2503	103.652	60.183
1	Deaths	179	Ethiopia	3	Both	17	60 to 64	487	Leukemia	3	1	Number	2000	79.1798	102.919	61.0331
1	Deaths	179	Ethiopia	3	Both	18	65 to 69	487	Leukemia	3	1	Number	2000	88.428	116.481	67.4923
1	Deaths	179	Ethiopia	3	Both	19	70 to 74	487	Leukemia	3	1	Number	2000	66.3958	87.5996	50.8817
1	Deaths	179	Ethiopia	3	Both	20	75 to 79	487	Leukemia	3	1	Number	2000	45.3637	58.6863	34.6447
1	Deaths	179	Ethiopia	3	Both	22	All Ages	487	Leukemia	3	1	Number	2000	975.915	1205.15	820.567
1	Deaths	179	Ethiopia	3	Both	23	5-14 years	487	Leukemia	3	1	Number	2000	121.434	174.987	80.6651
1	Deaths	179	Ethiopia	3	Both	24	15-49 years	487	Leukemia	3	1	Number	2000	314.702	388.098	258.21
1	Deaths	179	Ethiopia	3	Both	25	50-69 years	487	Leukemia	3	1	Number	2000	314.365	393.583	256.948
1	Deaths	179	Ethiopia	3	Both	26	70+ years	487	Leukemia	3	1	Number	2000	150.207	188.962	124.737
1	Deaths	179	Ethiopia	3	Both	28	<1 year	487	Leukemia	3	1	Number	2000	18.1503	26.6342	10.3487
1	Deaths	179	Ethiopia	3	Both	30	80 to 84	487	Leukemia	3	1	Number	2000	24.5744	32.4424	18.8538
1	Deaths	179	Ethiopia	3	Both	31	85 to 89	487	Leukemia	3	1	Number	2000	10.3536	13.6061	8.0073
1	Deaths	179	Ethiopia	3	Both	32	90 to 94	487	Leukemia	3	1	Number	2000	2.94176	3.63235	2.32889
1	Deaths	179	Ethiopia	3	Both	158	<20 years	487	Leukemia	3	1	Number	2000	267.39	348.981	193.815
1	Deaths	179	Ethiopia	3	Both	159	10 to 24	487	Leukemia	3	1	Number	2000	179.75	231.113	141.707
1	Deaths	179	Ethiopia	3	Both	169	10 to 54	487	Leukemia	3	1	Number	2000	444.637	551.763	369.101
1	Deaths	179	Ethiopia	3	Both	235	95 plus	487	Leukemia	3	1	Number	2000	0.577657	0.707524	0.456907
1	Deaths	179	Ethiopia	3	Both	1	Under 5	488	Other neoplasms	3	1	Number	2000	79.5059	117.358	48.7656
1	Deaths	179	Ethiopia	3	Both	2	Early Neonatal	488	Other neoplasms	3	1	Number	2000	3.66729	5.41856	2.49491
1	Deaths	179	Ethiopia	3	Both	3	Late Neonatal	488	Other neoplasms	3	1	Number	2000	2.89668	4.44927	1.83418
1	Deaths	179	Ethiopia	3	Both	4	Post Neonatal	488	Other neoplasms	3	1	Number	2000	15.1978	25.2253	8.72453
1	Deaths	179	Ethiopia	3	Both	5	1 to 4	488	Other neoplasms	3	1	Number	2000	57.7441	90.4555	31.2824
1	Deaths	179	Ethiopia	3	Both	6	5 to 9	488	Other neoplasms	3	1	Number	2000	46.5996	74.2627	25.6758
1	Deaths	179	Ethiopia	3	Both	7	10 to 14	488	Other neoplasms	3	1	Number	2000	66.3449	99.941	41.8699
1	Deaths	179	Ethiopia	3	Both	8	15 to 19	488	Other neoplasms	3	1	Number	2000	278.44	400.236	190.145
1	Deaths	179	Ethiopia	3	Both	9	20 to 24	488	Other neoplasms	3	1	Number	2000	234.817	335.411	161.109
1	Deaths	179	Ethiopia	3	Both	10	25 to 29	488	Other neoplasms	3	1	Number	2000	276.104	395.448	188.236
1	Deaths	179	Ethiopia	3	Both	11	30 to 34	488	Other neoplasms	3	1	Number	2000	379.123	539.698	256.426
1	Deaths	179	Ethiopia	3	Both	12	35 to 39	488	Other neoplasms	3	1	Number	2000	371.951	515.437	264.651
1	Deaths	179	Ethiopia	3	Both	13	40 to 44	488	Other neoplasms	3	1	Number	2000	452.43	634.342	319.057
1	Deaths	179	Ethiopia	3	Both	14	45 to 49	488	Other neoplasms	3	1	Number	2000	383.104	526.345	274.673
1	Deaths	179	Ethiopia	3	Both	15	50 to 54	488	Other neoplasms	3	1	Number	2000	374.953	511.312	272.731
1	Deaths	179	Ethiopia	3	Both	16	55 to 59	488	Other neoplasms	3	1	Number	2000	323.308	443.659	240.466
1	Deaths	179	Ethiopia	3	Both	17	60 to 64	488	Other neoplasms	3	1	Number	2000	247.8	342.513	181.12
1	Deaths	179	Ethiopia	3	Both	18	65 to 69	488	Other neoplasms	3	1	Number	2000	263.981	363.114	193.763
1	Deaths	179	Ethiopia	3	Both	19	70 to 74	488	Other neoplasms	3	1	Number	2000	204.417	275.7	145.687
1	Deaths	179	Ethiopia	3	Both	20	75 to 79	488	Other neoplasms	3	1	Number	2000	123.24	166.655	85.9669
1	Deaths	179	Ethiopia	3	Both	22	All Ages	488	Other neoplasms	3	1	Number	2000	4221.91	5149.23	3377.35
1	Deaths	179	Ethiopia	3	Both	23	5-14 years	488	Other neoplasms	3	1	Number	2000	112.944	160.642	73.4287
1	Deaths	179	Ethiopia	3	Both	24	15-49 years	488	Other neoplasms	3	1	Number	2000	2375.97	2960.17	1808.81
1	Deaths	179	Ethiopia	3	Both	25	50-69 years	488	Other neoplasms	3	1	Number	2000	1210.04	1534.64	953.674
1	Deaths	179	Ethiopia	3	Both	26	70+ years	488	Other neoplasms	3	1	Number	2000	443.444	564.473	338.224
1	Deaths	179	Ethiopia	3	Both	28	<1 year	488	Other neoplasms	3	1	Number	2000	21.7618	32.3243	14.3639
1	Deaths	179	Ethiopia	3	Both	30	80 to 84	488	Other neoplasms	3	1	Number	2000	75.351	108.7	51.4219
1	Deaths	179	Ethiopia	3	Both	31	85 to 89	488	Other neoplasms	3	1	Number	2000	31.2099	44.3691	20.5143
1	Deaths	179	Ethiopia	3	Both	32	90 to 94	488	Other neoplasms	3	1	Number	2000	7.87349	11.1462	5.22386
1	Deaths	179	Ethiopia	3	Both	158	<20 years	488	Other neoplasms	3	1	Number	2000	470.89	628.865	351.634
1	Deaths	179	Ethiopia	3	Both	159	10 to 24	488	Other neoplasms	3	1	Number	2000	579.601	759.454	433.387
1	Deaths	179	Ethiopia	3	Both	169	10 to 54	488	Other neoplasms	3	1	Number	2000	2817.27	3504.45	2192.79
1	Deaths	179	Ethiopia	3	Both	235	95 plus	488	Other neoplasms	3	1	Number	2000	1.35198	1.91061	0.88009
1	Deaths	179	Ethiopia	3	Both	1	Under 5	491	Cardiovascular diseases	2	1	Number	2000	1012.96	1350.28	704.465
1	Deaths	179	Ethiopia	3	Both	2	Early Neonatal	491	Cardiovascular diseases	2	1	Number	2000	112.273	151.562	79.6623
1	Deaths	179	Ethiopia	3	Both	3	Late Neonatal	491	Cardiovascular diseases	2	1	Number	2000	86.2972	128.489	55.9647
1	Deaths	179	Ethiopia	3	Both	4	Post Neonatal	491	Cardiovascular diseases	2	1	Number	2000	349.716	515.025	215.462
1	Deaths	179	Ethiopia	3	Both	5	1 to 4	491	Cardiovascular diseases	2	1	Number	2000	464.675	680.154	271.143
1	Deaths	179	Ethiopia	3	Both	3	Late Neonatal	699	Fire, heat, and hot substances	3	1	Number	2000	31.5008	50.0369	16.3621
1	Deaths	179	Ethiopia	3	Both	4	Post Neonatal	699	Fire, heat, and hot substances	3	1	Number	2000	304.008	493.113	185.991
1	Deaths	179	Ethiopia	3	Both	5	1 to 4	699	Fire, heat, and hot substances	3	1	Number	2000	827.931	1375.87	380.204
1	Deaths	179	Ethiopia	3	Both	6	5 to 9	699	Fire, heat, and hot substances	3	1	Number	2000	224.822	351.516	125.241
1	Deaths	179	Ethiopia	3	Both	7	10 to 14	699	Fire, heat, and hot substances	3	1	Number	2000	140.328	194.54	94.7138
1	Deaths	179	Ethiopia	3	Both	8	15 to 19	699	Fire, heat, and hot substances	3	1	Number	2000	94.2277	131.241	67.6774
1	Deaths	179	Ethiopia	3	Both	9	20 to 24	699	Fire, heat, and hot substances	3	1	Number	2000	118.527	165.425	83.6626
1	Deaths	179	Ethiopia	3	Both	10	25 to 29	699	Fire, heat, and hot substances	3	1	Number	2000	99.867	139.526	69.9513
1	Deaths	179	Ethiopia	3	Both	11	30 to 34	699	Fire, heat, and hot substances	3	1	Number	2000	91.9349	129.007	64.0458
1	Deaths	179	Ethiopia	3	Both	12	35 to 39	699	Fire, heat, and hot substances	3	1	Number	2000	101.952	139.547	69.1849
1	Deaths	179	Ethiopia	3	Both	13	40 to 44	699	Fire, heat, and hot substances	3	1	Number	2000	107.622	152.557	74.1949
1	Deaths	179	Ethiopia	3	Both	14	45 to 49	699	Fire, heat, and hot substances	3	1	Number	2000	127.149	180.12	89.6403
1	Deaths	179	Ethiopia	3	Both	15	50 to 54	699	Fire, heat, and hot substances	3	1	Number	2000	185.434	252.167	132.03
1	Deaths	179	Ethiopia	3	Both	16	55 to 59	699	Fire, heat, and hot substances	3	1	Number	2000	173.542	235.221	125.642
1	Deaths	179	Ethiopia	3	Both	17	60 to 64	699	Fire, heat, and hot substances	3	1	Number	2000	189.665	254.439	135.649
1	Deaths	179	Ethiopia	3	Both	18	65 to 69	699	Fire, heat, and hot substances	3	1	Number	2000	257.321	339.106	188.423
1	Deaths	179	Ethiopia	3	Both	19	70 to 74	699	Fire, heat, and hot substances	3	1	Number	2000	223.089	301.859	163.335
1	Deaths	179	Ethiopia	3	Both	20	75 to 79	699	Fire, heat, and hot substances	3	1	Number	2000	220.461	296.775	158.525
1	Deaths	179	Ethiopia	3	Both	22	All Ages	699	Fire, heat, and hot substances	3	1	Number	2000	3766.65	4605.51	2786.63
1	Deaths	179	Ethiopia	3	Both	23	5-14 years	699	Fire, heat, and hot substances	3	1	Number	2000	365.15	511.833	231.516
1	Deaths	179	Ethiopia	3	Both	24	15-49 years	699	Fire, heat, and hot substances	3	1	Number	2000	741.279	889.842	557.245
1	Deaths	179	Ethiopia	3	Both	25	50-69 years	699	Fire, heat, and hot substances	3	1	Number	2000	805.962	971.33	630.412
1	Deaths	179	Ethiopia	3	Both	26	70+ years	699	Fire, heat, and hot substances	3	1	Number	2000	668.827	802.583	527.245
1	Deaths	179	Ethiopia	3	Both	28	<1 year	699	Fire, heat, and hot substances	3	1	Number	2000	357.504	550.552	226.094
1	Deaths	179	Ethiopia	3	Both	30	80 to 84	699	Fire, heat, and hot substances	3	1	Number	2000	151.029	197.669	112.71
1	Deaths	179	Ethiopia	3	Both	31	85 to 89	699	Fire, heat, and hot substances	3	1	Number	2000	59.1956	79.1707	43.3135
1	Deaths	179	Ethiopia	3	Both	32	90 to 94	699	Fire, heat, and hot substances	3	1	Number	2000	12.7646	17.5211	9.36164
1	Deaths	179	Ethiopia	3	Both	158	<20 years	699	Fire, heat, and hot substances	3	1	Number	2000	1644.81	2355.55	940.304
1	Deaths	179	Ethiopia	3	Both	159	10 to 24	699	Fire, heat, and hot substances	3	1	Number	2000	353.082	445.342	269.697
1	Deaths	179	Ethiopia	3	Both	169	10 to 54	699	Fire, heat, and hot substances	3	1	Number	2000	1067.04	1263.03	807.51
1	Deaths	179	Ethiopia	3	Both	235	95 plus	699	Fire, heat, and hot substances	3	1	Number	2000	2.28788	3.14111	1.6494
1	Deaths	179	Ethiopia	3	Both	1	Under 5	700	Poisonings	3	1	Number	2000	784.703	2083.16	270.438
1	Deaths	179	Ethiopia	3	Both	2	Early Neonatal	700	Poisonings	3	1	Number	2000	10.378	41.5358	1.65825
1	Deaths	179	Ethiopia	3	Both	3	Late Neonatal	700	Poisonings	3	1	Number	2000	14.7342	46.9606	3.96347
1	Deaths	179	Ethiopia	3	Both	4	Post Neonatal	700	Poisonings	3	1	Number	2000	397.948	1483.81	72.4248
1	Deaths	179	Ethiopia	3	Both	5	1 to 4	700	Poisonings	3	1	Number	2000	361.643	988.247	90.0731
1	Deaths	179	Ethiopia	3	Both	6	5 to 9	700	Poisonings	3	1	Number	2000	62.1377	103.831	32.2005
1	Deaths	179	Ethiopia	3	Both	7	10 to 14	700	Poisonings	3	1	Number	2000	40.5109	61.8634	24.2962
1	Deaths	179	Ethiopia	3	Both	8	15 to 19	700	Poisonings	3	1	Number	2000	42.1105	61.9738	26.2141
1	Deaths	179	Ethiopia	3	Both	9	20 to 24	700	Poisonings	3	1	Number	2000	54.2473	79.0411	34.8213
1	Deaths	179	Ethiopia	3	Both	10	25 to 29	700	Poisonings	3	1	Number	2000	54.1073	80.1208	32.5904
1	Deaths	179	Ethiopia	3	Both	11	30 to 34	700	Poisonings	3	1	Number	2000	53.8315	78.3621	33.4482
1	Deaths	179	Ethiopia	3	Both	12	35 to 39	700	Poisonings	3	1	Number	2000	58.5734	87.4992	36.9169
1	Deaths	179	Ethiopia	3	Both	13	40 to 44	700	Poisonings	3	1	Number	2000	71.6348	104.534	46.0223
1	Deaths	179	Ethiopia	3	Both	14	45 to 49	700	Poisonings	3	1	Number	2000	79.2962	116.762	52.4784
1	Deaths	179	Ethiopia	3	Both	15	50 to 54	700	Poisonings	3	1	Number	2000	97.847	138.624	66.2354
1	Deaths	179	Ethiopia	3	Both	16	55 to 59	700	Poisonings	3	1	Number	2000	96.5427	137.598	62.5044
1	Deaths	179	Ethiopia	3	Both	17	60 to 64	700	Poisonings	3	1	Number	2000	93.3546	135.152	58.9213
1	Deaths	179	Ethiopia	3	Both	18	65 to 69	700	Poisonings	3	1	Number	2000	94.3696	138.401	60.0148
1	Deaths	179	Ethiopia	3	Both	19	70 to 74	700	Poisonings	3	1	Number	2000	69.3314	100.82	44.9042
1	Deaths	179	Ethiopia	3	Both	20	75 to 79	700	Poisonings	3	1	Number	2000	54.077	78.4607	33.4096
1	Deaths	179	Ethiopia	3	Both	22	All Ages	700	Poisonings	3	1	Number	2000	1850.12	3123.44	1177.79
1	Deaths	179	Ethiopia	3	Both	23	5-14 years	700	Poisonings	3	1	Number	2000	102.649	152.178	61.6766
1	Deaths	179	Ethiopia	3	Both	24	15-49 years	700	Poisonings	3	1	Number	2000	413.801	542.129	300.66
1	Deaths	179	Ethiopia	3	Both	25	50-69 years	700	Poisonings	3	1	Number	2000	382.114	498.773	283.088
1	Deaths	179	Ethiopia	3	Both	26	70+ years	700	Poisonings	3	1	Number	2000	166.852	221.08	117.475
1	Deaths	179	Ethiopia	3	Both	28	<1 year	700	Poisonings	3	1	Number	2000	423.06	1501.82	91.0608
1	Deaths	179	Ethiopia	3	Both	30	80 to 84	700	Poisonings	3	1	Number	2000	31.3358	45.4085	20.4003
1	Deaths	179	Ethiopia	3	Both	31	85 to 89	700	Poisonings	3	1	Number	2000	10.0451	14.7562	6.46726
1	Deaths	179	Ethiopia	3	Both	32	90 to 94	700	Poisonings	3	1	Number	2000	1.83536	2.65457	1.2234
1	Deaths	179	Ethiopia	3	Both	158	<20 years	700	Poisonings	3	1	Number	2000	929.462	2209.92	385.786
1	Deaths	179	Ethiopia	3	Both	159	10 to 24	700	Poisonings	3	1	Number	2000	136.869	184.823	96.9925
1	Deaths	179	Ethiopia	3	Both	169	10 to 54	700	Poisonings	3	1	Number	2000	552.159	716.922	407.375
1	Deaths	179	Ethiopia	3	Both	235	95 plus	700	Poisonings	3	1	Number	2000	0.227042	0.330743	0.148513
1	Deaths	179	Ethiopia	3	Both	1	Under 5	704	Exposure to mechanical forces	3	1	Number	2000	532.181	740.808	366.513
1	Deaths	179	Ethiopia	3	Both	2	Early Neonatal	704	Exposure to mechanical forces	3	1	Number	2000	54.7067	99.0298	31.4576
1	Deaths	179	Ethiopia	3	Both	3	Late Neonatal	704	Exposure to mechanical forces	3	1	Number	2000	112.262	252.301	50.5968
1	Deaths	179	Ethiopia	3	Both	4	Post Neonatal	704	Exposure to mechanical forces	3	1	Number	2000	147.299	219.901	90.8219
1	Deaths	179	Ethiopia	3	Both	5	1 to 4	704	Exposure to mechanical forces	3	1	Number	2000	217.914	346.027	121.402
1	Deaths	179	Ethiopia	3	Both	6	5 to 9	704	Exposure to mechanical forces	3	1	Number	2000	131.949	214.649	78.3614
1	Deaths	179	Ethiopia	3	Both	7	10 to 14	704	Exposure to mechanical forces	3	1	Number	2000	65.7537	89.3258	45.3514
1	Deaths	179	Ethiopia	3	Both	8	15 to 19	704	Exposure to mechanical forces	3	1	Number	2000	137.293	196.206	95.4009
1	Deaths	179	Ethiopia	3	Both	9	20 to 24	704	Exposure to mechanical forces	3	1	Number	2000	153.511	223.617	98.5979
1	Deaths	179	Ethiopia	3	Both	10	25 to 29	704	Exposure to mechanical forces	3	1	Number	2000	161.281	257.729	105.26
1	Deaths	179	Ethiopia	3	Both	11	30 to 34	704	Exposure to mechanical forces	3	1	Number	2000	135.518	193.192	94.7097
1	Deaths	179	Ethiopia	3	Both	12	35 to 39	704	Exposure to mechanical forces	3	1	Number	2000	118.904	175.471	78.1523
1	Deaths	179	Ethiopia	3	Both	13	40 to 44	704	Exposure to mechanical forces	3	1	Number	2000	82.4383	109.547	61.1399
1	Deaths	179	Ethiopia	3	Both	14	45 to 49	704	Exposure to mechanical forces	3	1	Number	2000	166.266	226.729	120.124
1	Deaths	179	Ethiopia	3	Both	15	50 to 54	704	Exposure to mechanical forces	3	1	Number	2000	141.179	200.059	98.2916
1	Deaths	179	Ethiopia	3	Both	16	55 to 59	704	Exposure to mechanical forces	3	1	Number	2000	111.852	149.562	81.4394
1	Deaths	179	Ethiopia	3	Both	17	60 to 64	704	Exposure to mechanical forces	3	1	Number	2000	78.5716	112.088	54.5528
1	Deaths	179	Ethiopia	3	Both	18	65 to 69	704	Exposure to mechanical forces	3	1	Number	2000	70.1775	94.0226	51.4389
1	Deaths	179	Ethiopia	3	Both	19	70 to 74	704	Exposure to mechanical forces	3	1	Number	2000	54.2795	70.3899	39.9375
1	Deaths	179	Ethiopia	3	Both	20	75 to 79	704	Exposure to mechanical forces	3	1	Number	2000	54.4607	72.5084	40.752
1	Deaths	179	Ethiopia	3	Both	22	All Ages	704	Exposure to mechanical forces	3	1	Number	2000	2276.02	2653.31	1954.32
1	Deaths	179	Ethiopia	3	Both	23	5-14 years	704	Exposure to mechanical forces	3	1	Number	2000	197.703	282.668	132.955
1	Deaths	179	Ethiopia	3	Both	24	15-49 years	704	Exposure to mechanical forces	3	1	Number	2000	955.211	1284.42	763.279
1	Deaths	179	Ethiopia	3	Both	25	50-69 years	704	Exposure to mechanical forces	3	1	Number	2000	401.781	489.809	328.378
1	Deaths	179	Ethiopia	3	Both	26	70+ years	704	Exposure to mechanical forces	3	1	Number	2000	189.141	223.366	157.294
1	Deaths	179	Ethiopia	3	Both	28	<1 year	704	Exposure to mechanical forces	3	1	Number	2000	314.268	470.601	214.214
1	Deaths	179	Ethiopia	3	Both	30	80 to 84	704	Exposure to mechanical forces	3	1	Number	2000	45.1122	59.5845	33.732
1	Deaths	179	Ethiopia	3	Both	31	85 to 89	704	Exposure to mechanical forces	3	1	Number	2000	23.8453	30.4645	18.4182
1	Deaths	179	Ethiopia	3	Both	32	90 to 94	704	Exposure to mechanical forces	3	1	Number	2000	9.09346	11.6864	6.86319
1	Deaths	179	Ethiopia	3	Both	158	<20 years	704	Exposure to mechanical forces	3	1	Number	2000	867.176	1101.1	650.174
1	Deaths	179	Ethiopia	3	Both	159	10 to 24	704	Exposure to mechanical forces	3	1	Number	2000	356.557	473.907	268.635
1	Deaths	179	Ethiopia	3	Both	169	10 to 54	704	Exposure to mechanical forces	3	1	Number	2000	1162.14	1523.19	955.073
1	Deaths	179	Ethiopia	3	Both	235	95 plus	704	Exposure to mechanical forces	3	1	Number	2000	2.34965	3.04544	1.75228
1	Deaths	179	Ethiopia	3	Both	1	Under 5	705	Unintentional firearm injuries	4	1	Number	2000	21.2923	48.5029	11.1773
1	Deaths	179	Ethiopia	3	Both	2	Early Neonatal	705	Unintentional firearm injuries	4	1	Number	2000	1.10319	2.3726	0.511001
1	Deaths	179	Ethiopia	3	Both	3	Late Neonatal	705	Unintentional firearm injuries	4	1	Number	2000	0.892753	2.04741	0.425965
1	Deaths	179	Ethiopia	3	Both	4	Post Neonatal	705	Unintentional firearm injuries	4	1	Number	2000	8.21166	17.5727	3.82153
1	Deaths	179	Ethiopia	3	Both	5	1 to 4	705	Unintentional firearm injuries	4	1	Number	2000	11.0847	26.9124	4.37895
1	Deaths	179	Ethiopia	3	Both	6	5 to 9	705	Unintentional firearm injuries	4	1	Number	2000	5.47005	12.6473	2.50337
1	Deaths	179	Ethiopia	3	Both	7	10 to 14	705	Unintentional firearm injuries	4	1	Number	2000	5.85238	12.8536	2.98871
1	Deaths	179	Ethiopia	3	Both	8	15 to 19	705	Unintentional firearm injuries	4	1	Number	2000	23.2942	68.4743	10.168
1	Deaths	179	Ethiopia	3	Both	9	20 to 24	705	Unintentional firearm injuries	4	1	Number	2000	23.4799	74.2901	7.61323
1	Deaths	179	Ethiopia	3	Both	10	25 to 29	705	Unintentional firearm injuries	4	1	Number	2000	56.5144	150.069	24.8937
1	Deaths	179	Ethiopia	3	Both	11	30 to 34	705	Unintentional firearm injuries	4	1	Number	2000	41.8442	93.4622	20.778
1	Deaths	179	Ethiopia	3	Both	12	35 to 39	705	Unintentional firearm injuries	4	1	Number	2000	16.8572	47.878	7.92566
1	Deaths	179	Ethiopia	3	Both	13	40 to 44	705	Unintentional firearm injuries	4	1	Number	2000	21.1616	34.3383	12.5664
1	Deaths	179	Ethiopia	3	Both	14	45 to 49	705	Unintentional firearm injuries	4	1	Number	2000	33.8433	68.1956	18.6527
1	Deaths	179	Ethiopia	3	Both	15	50 to 54	705	Unintentional firearm injuries	4	1	Number	2000	9.80072	17.5838	5.60173
1	Deaths	179	Ethiopia	3	Both	16	55 to 59	705	Unintentional firearm injuries	4	1	Number	2000	9.34621	15.6818	5.89193
1	Deaths	179	Ethiopia	3	Both	17	60 to 64	705	Unintentional firearm injuries	4	1	Number	2000	7.81654	13.6628	4.84604
1	Deaths	179	Ethiopia	3	Both	18	65 to 69	705	Unintentional firearm injuries	4	1	Number	2000	7.79637	15.634	4.63704
1	Deaths	179	Ethiopia	3	Both	19	70 to 74	705	Unintentional firearm injuries	4	1	Number	2000	6.81804	13.868	4.055
1	Deaths	179	Ethiopia	3	Both	20	75 to 79	705	Unintentional firearm injuries	4	1	Number	2000	9.92804	16.7723	6.33409
1	Deaths	179	Ethiopia	3	Both	22	All Ages	705	Unintentional firearm injuries	4	1	Number	2000	313.794	696.05	210.77
1	Deaths	179	Ethiopia	3	Both	23	5-14 years	705	Unintentional firearm injuries	4	1	Number	2000	11.3224	24.8095	5.97509
1	Deaths	179	Ethiopia	3	Both	24	15-49 years	705	Unintentional firearm injuries	4	1	Number	2000	216.995	520.093	133.537
1	Deaths	179	Ethiopia	3	Both	25	50-69 years	705	Unintentional firearm injuries	4	1	Number	2000	34.7598	60.7091	24.8099
1	Deaths	179	Ethiopia	3	Both	26	70+ years	705	Unintentional firearm injuries	4	1	Number	2000	29.4245	49.9404	21.4945
1	Deaths	179	Ethiopia	3	Both	28	<1 year	705	Unintentional firearm injuries	4	1	Number	2000	10.2076	21.5352	5.38776
1	Deaths	179	Ethiopia	3	Both	30	80 to 84	705	Unintentional firearm injuries	4	1	Number	2000	6.34868	11.1208	3.98795
1	Deaths	179	Ethiopia	3	Both	31	85 to 89	705	Unintentional firearm injuries	4	1	Number	2000	3.61594	6.09766	2.23076
1	Deaths	179	Ethiopia	3	Both	32	90 to 94	705	Unintentional firearm injuries	4	1	Number	2000	2.10275	3.32064	1.31523
1	Deaths	179	Ethiopia	3	Both	158	<20 years	705	Unintentional firearm injuries	4	1	Number	2000	55.9089	136.82	31.2625
1	Deaths	179	Ethiopia	3	Both	159	10 to 24	705	Unintentional firearm injuries	4	1	Number	2000	52.6265	151.531	25.2139
1	Deaths	179	Ethiopia	3	Both	169	10 to 54	705	Unintentional firearm injuries	4	1	Number	2000	232.648	552.931	145.01
1	Deaths	179	Ethiopia	3	Both	235	95 plus	705	Unintentional firearm injuries	4	1	Number	2000	0.611048	0.93491	0.385688
1	Deaths	179	Ethiopia	3	Both	1	Under 5	706	Unintentional suffocation	4	1	Number	2000	177.805	330.569	97.6205
1	Deaths	179	Ethiopia	3	Both	2	Early Neonatal	706	Unintentional suffocation	4	1	Number	2000	38.1851	81.2694	16.2497
1	Deaths	179	Ethiopia	3	Both	3	Late Neonatal	706	Unintentional suffocation	4	1	Number	2000	97.1418	235.387	36.9928
1	Deaths	179	Ethiopia	3	Both	4	Post Neonatal	706	Unintentional suffocation	4	1	Number	2000	28.7886	63.1472	10.0564
1	Deaths	179	Ethiopia	3	Both	5	1 to 4	706	Unintentional suffocation	4	1	Number	2000	13.6894	36.4245	4.13677
1	Deaths	179	Ethiopia	3	Both	6	5 to 9	706	Unintentional suffocation	4	1	Number	2000	9.34689	18.6811	4.30476
1	Deaths	179	Ethiopia	3	Both	7	10 to 14	706	Unintentional suffocation	4	1	Number	2000	7.20384	11.5019	4.12142
1	Deaths	179	Ethiopia	3	Both	8	15 to 19	706	Unintentional suffocation	4	1	Number	2000	13.5005	22.3774	7.86773
1	Deaths	179	Ethiopia	3	Both	9	20 to 24	706	Unintentional suffocation	4	1	Number	2000	8.97517	14.2613	5.40501
1	Deaths	179	Ethiopia	3	Both	10	25 to 29	706	Unintentional suffocation	4	1	Number	2000	9.62472	16.7551	5.13943
1	Deaths	179	Ethiopia	3	Both	11	30 to 34	706	Unintentional suffocation	4	1	Number	2000	7.56926	13.0102	4.08717
1	Deaths	179	Ethiopia	3	Both	12	35 to 39	706	Unintentional suffocation	4	1	Number	2000	5.51111	9.1428	3.14974
1	Deaths	179	Ethiopia	3	Both	13	40 to 44	706	Unintentional suffocation	4	1	Number	2000	4.55697	8.77058	2.36238
1	Deaths	179	Ethiopia	3	Both	14	45 to 49	706	Unintentional suffocation	4	1	Number	2000	5.82379	9.53142	3.21881
1	Deaths	179	Ethiopia	3	Both	15	50 to 54	706	Unintentional suffocation	4	1	Number	2000	5.92975	9.56965	3.3978
1	Deaths	179	Ethiopia	3	Both	16	55 to 59	706	Unintentional suffocation	4	1	Number	2000	9.02781	16.5621	4.46075
1	Deaths	179	Ethiopia	3	Both	17	60 to 64	706	Unintentional suffocation	4	1	Number	2000	5.21222	11.9096	1.91602
1	Deaths	179	Ethiopia	3	Both	18	65 to 69	706	Unintentional suffocation	4	1	Number	2000	5.81968	13.4547	2.31427
1	Deaths	179	Ethiopia	3	Both	19	70 to 74	706	Unintentional suffocation	4	1	Number	2000	5.60262	14.1639	1.82545
1	Deaths	179	Ethiopia	3	Both	20	75 to 79	706	Unintentional suffocation	4	1	Number	2000	6.09487	14.0956	2.39737
1	Deaths	179	Ethiopia	3	Both	22	All Ages	706	Unintentional suffocation	4	1	Number	2000	298.086	453.018	206.269
1	Deaths	179	Ethiopia	3	Both	23	5-14 years	706	Unintentional suffocation	4	1	Number	2000	16.5507	27.1912	9.88409
1	Deaths	179	Ethiopia	3	Both	24	15-49 years	706	Unintentional suffocation	4	1	Number	2000	55.5616	72.5348	41.6272
1	Deaths	179	Ethiopia	3	Both	25	50-69 years	706	Unintentional suffocation	4	1	Number	2000	25.9895	39.8753	17.3823
1	Deaths	179	Ethiopia	3	Both	26	70+ years	706	Unintentional suffocation	4	1	Number	2000	22.1791	34.2381	14.0771
1	Deaths	179	Ethiopia	3	Both	28	<1 year	706	Unintentional suffocation	4	1	Number	2000	164.115	312.408	86.6439
1	Deaths	179	Ethiopia	3	Both	30	80 to 84	706	Unintentional suffocation	4	1	Number	2000	6.03478	10.6906	3.10606
1	Deaths	179	Ethiopia	3	Both	31	85 to 89	706	Unintentional suffocation	4	1	Number	2000	3.16383	5.60447	1.63222
1	Deaths	179	Ethiopia	3	Both	32	90 to 94	706	Unintentional suffocation	4	1	Number	2000	0.987581	1.70587	0.525807
1	Deaths	179	Ethiopia	3	Both	158	<20 years	706	Unintentional suffocation	4	1	Number	2000	207.856	358.319	125.849
1	Deaths	179	Ethiopia	3	Both	159	10 to 24	706	Unintentional suffocation	4	1	Number	2000	29.6795	41.2255	20.9636
1	Deaths	179	Ethiopia	3	Both	169	10 to 54	706	Unintentional suffocation	4	1	Number	2000	68.6952	88.0428	52.5417
1	Deaths	179	Ethiopia	3	Both	235	95 plus	706	Unintentional suffocation	4	1	Number	2000	0.295449	0.537999	0.155456
1	Deaths	179	Ethiopia	3	Both	1	Under 5	707	Other exposure to mechanical forces	4	1	Number	2000	333.084	479.775	216.852
1	Deaths	179	Ethiopia	3	Both	2	Early Neonatal	707	Other exposure to mechanical forces	4	1	Number	2000	15.4184	23.3151	10.4838
1	Deaths	179	Ethiopia	3	Both	3	Late Neonatal	707	Other exposure to mechanical forces	4	1	Number	2000	14.2277	22.0198	8.6476
1	Deaths	179	Ethiopia	3	Both	4	Post Neonatal	707	Other exposure to mechanical forces	4	1	Number	2000	110.298	179.107	67.1718
1	Deaths	179	Ethiopia	3	Both	5	1 to 4	707	Other exposure to mechanical forces	4	1	Number	2000	193.14	313.16	105.204
1	Deaths	179	Ethiopia	3	Both	6	5 to 9	707	Other exposure to mechanical forces	4	1	Number	2000	117.132	198.775	66.4085
1	Deaths	179	Ethiopia	3	Both	7	10 to 14	707	Other exposure to mechanical forces	4	1	Number	2000	52.6975	75.239	35.3001
1	Deaths	179	Ethiopia	3	Both	8	15 to 19	707	Other exposure to mechanical forces	4	1	Number	2000	100.498	144.191	68.0511
1	Deaths	179	Ethiopia	3	Both	9	20 to 24	707	Other exposure to mechanical forces	4	1	Number	2000	121.056	186.291	75.1511
1	Deaths	179	Ethiopia	3	Both	10	25 to 29	707	Other exposure to mechanical forces	4	1	Number	2000	95.1414	145.057	61.5814
1	Deaths	179	Ethiopia	3	Both	11	30 to 34	707	Other exposure to mechanical forces	4	1	Number	2000	86.1049	125.561	59.4179
1	Deaths	179	Ethiopia	3	Both	12	35 to 39	707	Other exposure to mechanical forces	4	1	Number	2000	96.536	148.787	61.0857
1	Deaths	179	Ethiopia	3	Both	13	40 to 44	707	Other exposure to mechanical forces	4	1	Number	2000	56.7197	81.5415	39.2037
1	Deaths	179	Ethiopia	3	Both	14	45 to 49	707	Other exposure to mechanical forces	4	1	Number	2000	126.599	186.793	86.5823
1	Deaths	179	Ethiopia	3	Both	15	50 to 54	707	Other exposure to mechanical forces	4	1	Number	2000	125.449	184.739	84.497
1	Deaths	179	Ethiopia	3	Both	16	55 to 59	707	Other exposure to mechanical forces	4	1	Number	2000	93.4782	128.94	65.438
1	Deaths	179	Ethiopia	3	Both	17	60 to 64	707	Other exposure to mechanical forces	4	1	Number	2000	65.5429	98.6219	43.7452
1	Deaths	179	Ethiopia	3	Both	18	65 to 69	707	Other exposure to mechanical forces	4	1	Number	2000	56.5615	79.3663	39.7061
1	Deaths	179	Ethiopia	3	Both	19	70 to 74	707	Other exposure to mechanical forces	4	1	Number	2000	41.8588	57.5392	29.6902
1	Deaths	179	Ethiopia	3	Both	20	75 to 79	707	Other exposure to mechanical forces	4	1	Number	2000	38.4378	54.3436	27.9794
1	Deaths	179	Ethiopia	3	Both	22	All Ages	707	Other exposure to mechanical forces	4	1	Number	2000	1664.14	1940.24	1383.78
1	Deaths	179	Ethiopia	3	Both	23	5-14 years	707	Other exposure to mechanical forces	4	1	Number	2000	169.829	250.059	110.794
1	Deaths	179	Ethiopia	3	Both	24	15-49 years	707	Other exposure to mechanical forces	4	1	Number	2000	682.655	830.269	554.497
1	Deaths	179	Ethiopia	3	Both	25	50-69 years	707	Other exposure to mechanical forces	4	1	Number	2000	341.031	425.944	269.127
1	Deaths	179	Ethiopia	3	Both	26	70+ years	707	Other exposure to mechanical forces	4	1	Number	2000	137.537	166.326	111.396
1	Deaths	179	Ethiopia	3	Both	28	<1 year	707	Other exposure to mechanical forces	4	1	Number	2000	139.944	209.926	95.2139
1	Deaths	179	Ethiopia	3	Both	30	80 to 84	707	Other exposure to mechanical forces	4	1	Number	2000	32.7287	46.1952	23.1069
1	Deaths	179	Ethiopia	3	Both	31	85 to 89	707	Other exposure to mechanical forces	4	1	Number	2000	17.0656	23	12.645
1	Deaths	179	Ethiopia	3	Both	32	90 to 94	707	Other exposure to mechanical forces	4	1	Number	2000	6.00313	8.73648	4.13897
1	Deaths	179	Ethiopia	3	Both	158	<20 years	707	Other exposure to mechanical forces	4	1	Number	2000	603.411	797.146	435.573
1	Deaths	179	Ethiopia	3	Both	159	10 to 24	707	Other exposure to mechanical forces	4	1	Number	2000	274.251	361.424	206.812
1	Deaths	179	Ethiopia	3	Both	169	10 to 54	707	Other exposure to mechanical forces	4	1	Number	2000	860.801	1039.91	697.015
1	Deaths	179	Ethiopia	3	Both	235	95 plus	707	Other exposure to mechanical forces	4	1	Number	2000	1.44316	2.04656	0.984165
1	Deaths	179	Ethiopia	3	Both	1	Under 5	708	Adverse effects of medical treatment	3	1	Number	2000	693.95	1266.82	237.149
1	Deaths	179	Ethiopia	3	Both	2	Early Neonatal	708	Adverse effects of medical treatment	3	1	Number	2000	33.2763	50.4345	20.4824
1	Deaths	179	Ethiopia	3	Both	3	Late Neonatal	708	Adverse effects of medical treatment	3	1	Number	2000	36.2596	62.1354	18.1295
1	Deaths	179	Ethiopia	3	Both	4	Post Neonatal	708	Adverse effects of medical treatment	3	1	Number	2000	273.54	513.044	107.503
1	Deaths	179	Ethiopia	3	Both	5	1 to 4	708	Adverse effects of medical treatment	3	1	Number	2000	350.874	767.731	67.0184
1	Deaths	179	Ethiopia	3	Both	6	5 to 9	708	Adverse effects of medical treatment	3	1	Number	2000	73.6611	119.046	35.484
1	Deaths	179	Ethiopia	3	Both	7	10 to 14	708	Adverse effects of medical treatment	3	1	Number	2000	62.3473	87.7978	40.4795
1	Deaths	179	Ethiopia	3	Both	8	15 to 19	708	Adverse effects of medical treatment	3	1	Number	2000	64.469	88.515	44.9091
1	Deaths	179	Ethiopia	3	Both	9	20 to 24	708	Adverse effects of medical treatment	3	1	Number	2000	80.5316	112.923	59.3434
1	Deaths	179	Ethiopia	3	Both	10	25 to 29	708	Adverse effects of medical treatment	3	1	Number	2000	74.3181	100.561	53.0335
1	Deaths	179	Ethiopia	3	Both	11	30 to 34	708	Adverse effects of medical treatment	3	1	Number	2000	68.5561	94.9421	47.8993
1	Deaths	179	Ethiopia	3	Both	12	35 to 39	708	Adverse effects of medical treatment	3	1	Number	2000	66.5202	91.5083	47.1041
1	Deaths	179	Ethiopia	3	Both	13	40 to 44	708	Adverse effects of medical treatment	3	1	Number	2000	67.2323	94.7711	47.5927
1	Deaths	179	Ethiopia	3	Both	14	45 to 49	708	Adverse effects of medical treatment	3	1	Number	2000	71.5581	98.1282	50.6496
1	Deaths	179	Ethiopia	3	Both	15	50 to 54	708	Adverse effects of medical treatment	3	1	Number	2000	65.957	89.9684	47.4009
1	Deaths	179	Ethiopia	3	Both	16	55 to 59	708	Adverse effects of medical treatment	3	1	Number	2000	73.6234	101.231	50.2249
1	Deaths	179	Ethiopia	3	Both	17	60 to 64	708	Adverse effects of medical treatment	3	1	Number	2000	81.3365	115.246	54.8839
1	Deaths	179	Ethiopia	3	Both	18	65 to 69	708	Adverse effects of medical treatment	3	1	Number	2000	88.4132	126.805	58.7508
1	Deaths	179	Ethiopia	3	Both	19	70 to 74	708	Adverse effects of medical treatment	3	1	Number	2000	79.2584	113.881	52.3303
1	Deaths	179	Ethiopia	3	Both	20	75 to 79	708	Adverse effects of medical treatment	3	1	Number	2000	79.2475	119.886	51.9934
1	Deaths	179	Ethiopia	3	Both	22	All Ages	708	Adverse effects of medical treatment	3	1	Number	2000	1889.09	2499.09	1375.76
1	Deaths	179	Ethiopia	3	Both	23	5-14 years	708	Adverse effects of medical treatment	3	1	Number	2000	136.008	200.836	79.6314
1	Deaths	179	Ethiopia	3	Both	24	15-49 years	708	Adverse effects of medical treatment	3	1	Number	2000	493.185	599.642	399.007
1	Deaths	179	Ethiopia	3	Both	25	50-69 years	708	Adverse effects of medical treatment	3	1	Number	2000	309.33	394.642	237.66
1	Deaths	179	Ethiopia	3	Both	26	70+ years	708	Adverse effects of medical treatment	3	1	Number	2000	256.613	369.953	174.361
1	Deaths	179	Ethiopia	3	Both	28	<1 year	708	Adverse effects of medical treatment	3	1	Number	2000	343.076	596.167	158.556
1	Deaths	179	Ethiopia	3	Both	30	80 to 84	708	Adverse effects of medical treatment	3	1	Number	2000	59.9214	99.4082	35.56
1	Deaths	179	Ethiopia	3	Both	31	85 to 89	708	Adverse effects of medical treatment	3	1	Number	2000	27.3744	48.1461	15.0578
1	Deaths	179	Ethiopia	3	Both	32	90 to 94	708	Adverse effects of medical treatment	3	1	Number	2000	8.71325	15.9075	4.43268
1	Deaths	179	Ethiopia	3	Both	158	<20 years	708	Adverse effects of medical treatment	3	1	Number	2000	894.427	1512.23	389.698
1	Deaths	179	Ethiopia	3	Both	159	10 to 24	708	Adverse effects of medical treatment	3	1	Number	2000	207.348	261.925	164.591
1	Deaths	179	Ethiopia	3	Both	169	10 to 54	708	Adverse effects of medical treatment	3	1	Number	2000	621.49	750.364	513.862
1	Deaths	179	Ethiopia	3	Both	235	95 plus	708	Adverse effects of medical treatment	3	1	Number	2000	2.09764	3.90607	1.04661
1	Deaths	179	Ethiopia	3	Both	1	Under 5	709	Animal contact	3	1	Number	2000	366.192	595.504	196.852
1	Deaths	179	Ethiopia	3	Both	2	Early Neonatal	709	Animal contact	3	1	Number	2000	5.50059	8.35408	3.34197
1	Deaths	179	Ethiopia	3	Both	3	Late Neonatal	709	Animal contact	3	1	Number	2000	5.27102	8.69564	3.07307
1	Deaths	179	Ethiopia	3	Both	4	Post Neonatal	709	Animal contact	3	1	Number	2000	63.9678	116.595	33.9249
1	Deaths	179	Ethiopia	3	Both	5	1 to 4	709	Animal contact	3	1	Number	2000	291.453	502.958	134.799
1	Deaths	179	Ethiopia	3	Both	6	5 to 9	709	Animal contact	3	1	Number	2000	161.894	256.465	85.6067
1	Deaths	179	Ethiopia	3	Both	7	10 to 14	709	Animal contact	3	1	Number	2000	121.817	190.951	71.6672
1	Deaths	179	Ethiopia	3	Both	8	15 to 19	709	Animal contact	3	1	Number	2000	60.1858	89.6389	37.261
1	Deaths	179	Ethiopia	3	Both	9	20 to 24	709	Animal contact	3	1	Number	2000	45.646	69.2236	26.9715
1	Deaths	179	Ethiopia	3	Both	10	25 to 29	709	Animal contact	3	1	Number	2000	62.1135	93.711	36.0881
1	Deaths	179	Ethiopia	3	Both	11	30 to 34	709	Animal contact	3	1	Number	2000	59.1248	93.4797	34.5607
1	Deaths	179	Ethiopia	3	Both	12	35 to 39	709	Animal contact	3	1	Number	2000	64.545	100.62	37.4079
1	Deaths	179	Ethiopia	3	Both	13	40 to 44	709	Animal contact	3	1	Number	2000	81.1353	123.178	50.6181
1	Deaths	179	Ethiopia	3	Both	14	45 to 49	709	Animal contact	3	1	Number	2000	105.844	165.917	62.0338
1	Deaths	179	Ethiopia	3	Both	15	50 to 54	709	Animal contact	3	1	Number	2000	154.74	232.777	95.1073
1	Deaths	179	Ethiopia	3	Both	16	55 to 59	709	Animal contact	3	1	Number	2000	163.422	248.602	100.413
1	Deaths	179	Ethiopia	3	Both	17	60 to 64	709	Animal contact	3	1	Number	2000	158.327	236.526	97.0079
1	Deaths	179	Ethiopia	3	Both	18	65 to 69	709	Animal contact	3	1	Number	2000	178.586	282.156	106.706
1	Deaths	179	Ethiopia	3	Both	19	70 to 74	709	Animal contact	3	1	Number	2000	152.143	229.924	95.0213
1	Deaths	179	Ethiopia	3	Both	20	75 to 79	709	Animal contact	3	1	Number	2000	106.465	160.548	64.8023
1	Deaths	179	Ethiopia	3	Both	22	All Ages	709	Animal contact	3	1	Number	2000	2136.75	2725.57	1524
1	Deaths	179	Ethiopia	3	Both	23	5-14 years	709	Animal contact	3	1	Number	2000	283.711	421.238	167.649
1	Deaths	179	Ethiopia	3	Both	24	15-49 years	709	Animal contact	3	1	Number	2000	478.595	621.731	330.352
1	Deaths	179	Ethiopia	3	Both	25	50-69 years	709	Animal contact	3	1	Number	2000	655.075	883.872	453.92
1	Deaths	179	Ethiopia	3	Both	26	70+ years	709	Animal contact	3	1	Number	2000	353.177	478.128	253.026
1	Deaths	179	Ethiopia	3	Both	28	<1 year	709	Animal contact	3	1	Number	2000	74.7394	127.44	43.1496
1	Deaths	179	Ethiopia	3	Both	30	80 to 84	709	Animal contact	3	1	Number	2000	67.0822	100.513	41.5346
1	Deaths	179	Ethiopia	3	Both	31	85 to 89	709	Animal contact	3	1	Number	2000	22.2866	34.239	13.216
[truncated: 28,201 more rows]

## Sheet: pivot
year	(All)
code	(All)
합계 : val	Column Labels
Row Labels	All Ages	95 plus	90 to 94	85 to 89	80 to 84	75 to 79	70 to 74	65 to 69	60 to 64	55 to 59	50 to 54	5 to 9	45 to 49	40 to 44	35 to 39	30 to 34	25 to 29	20 to 24	15 to 19	10 to 14	1 to 4	<1 year	Grand Total
All causes	3.15555e+06	4834.43	20612.5	63885.2	135232	180608	194354	194178	167404	150048	134013	74596.7	120347	116419	110452	104278	99347.6	95520.9	78179.5	55386.1	373848	682007	6.3111e+06
Communicable, maternal, neonatal, and nutritional diseases	1.88261e+06	1730.13	6630.36	20632.6	40424.1	58321	59958.7	63083.1	57774	59558.6	57825.9	52379.5	59851.3	64497	67633.6	65527.3	58615.1	47891.3	38693.4	31581.4	330209	639794	3.76522e+06
Non-communicable diseases	967655	2856.23	12874.8	39709.9	87200.4	111570	123032	118538	98351	78276.2	63436.6	5807.97	48596.7	38975.5	27025.3	19950.3	15923.9	14445.6	13494	7456.66	13353.9	26779.9	1.93531e+06
Diarrhea, lower respiratory, and other common infectious diseases	924114	1146.8	4268.21	12945	24786.3	34586.5	33249.3	32682.9	28306.6	22372.8	18906.7	38261.5	16906.1	15056.6	14068.4	13479.9	14239.3	16075.6	17522.4	20374	249509	295370	1.84823e+06
Cardiovascular diseases	416279	1406.09	6497.15	20815.7	47272.1	62821.2	63578.6	56466	43630.4	32673.7	24240.5	738.844	17589.2	12187.3	7189.88	4961.07	3356.48	3275.21	3030.01	1196.9	1460.24	1892.65	832559
HIV/AIDS and tuberculosis	414578	401.796	1340.15	5005.75	11270.3	17884.5	20663.7	24271	24087	31854.6	33606.7	5175.18	33583.9	36912.3	39386.7	37252.2	29740.8	17817.4	12545.8	6640.12	12160.9	12977.7	829157
Injuries	305283	248.073	1107.41	3542.73	7607.1	10717.6	11363.4	12556.8	11278.7	12213.2	12750.5	16409.3	11899.3	12946.1	15792.8	18800.3	24808.7	33183.9	25992	16348.1	30285.1	15432.3	610567
Lower respiratory infections	292983	402.188	1751.2	5476.47	11269.8	16110.3	14668.3	12990.5	11276.3	8327.35	6912.64	5178.15	5821.38	4939.63	4021.07	3403.32	3454.82	3376.8	2798.66	3851.32	51837.5	115115	585966
Tuberculosis	275186	400.617	1331.75	4965.88	11148.3	17275.6	19588	22325.5	21248.3	27231.3	25094.6	1688.29	20177.4	18104	17780	16496.7	15085.3	12470.9	7120.48	2187.64	7849.13	5616.45	550372
Diarrheal diseases	272903	684.482	2233.68	6505.94	11168.8	16827.7	15667.5	16027.9	13798.3	10231	8346.65	7866.76	7340.11	6850.13	6247.68	5876.87	5988.49	6677.55	6116.26	4475.85	45763.4	68208	545806
Neonatal disorders	269457																				1289.07	268168	538915
Drug-susceptible tuberculosis	264542	380.997	1270.35	4738.13	10663.4	16578.9	18824.3	21459.7	20436.3	26196.9	24143	1622.26	19433.4	17448.3	17121.1	15854	14479.4	11963.9	6825.99	2101.01	7581.43	5418.91	529083
Neoplasms	197294	295.636	1335.67	4696.66	11659.4	12151.8	22597	25244.2	23835.4	20326.3	18761.4	2275.53	14354.1	11835.4	8141.9	5698.25	3603.6	3097.84	3036.18	2372.73	1671.21	303.921	394589
Measles	185058									44.0561	46.0929	15761.2	61.3899	92.2449	126.925	213.711	379.459	856.266	1891.86	5203.37	109064	51318	370117
Ischemic heart disease	172440	684.873	2914.79	9320.63	19655.4	27004.8	26573.9	23984.7	17538.6	14213.6	9892.99	54.4074	7774.52	4820.72	2995.78	1749.5	1232.19	896.819	1004.56	82.7916	33.5212	10.9617	344880
Stroke	140792	280.476	1514.37	5245.55	15377.5	21147.2	23798.5	20197.4	16452.8	10913.3	8774.97	188.226	5743.8	4009.67	1876.86	1541.69	773.14	1131.95	901.157	317.675	324.912	281.14	281585
HIV/AIDS	139393	1.17895	8.39258	39.8605	122.028	608.872	1075.68	1945.48	2838.69	4623.32	8512.14	3486.89	13406.6	18808.2	21606.7	20755.5	14655.5	5346.53	5425.37	4452.49	4311.8	7361.21	278785
Nutritional deficiencies	104115	132.207	887.358	1967.51	3087.37	3785.2	3736.98	2939.01	2764.75	2538.56	2208.43	3106.13	1483.21	1465.46	1052.38	1040.66	1057.13	1105.36	893.133	1359.2	43556.9	23948.2	208230
Unintentional injuries	101317	208.489	927.689	2714.17	5176.1	6324.78	5901.04	5782.93	4859.22	4557.09	4415.41	5996.65	3835.86	3262.36	3465.64	3372.18	3718.85	4027.25	4120.9	5864.2	13450.3	9335.74	202634
Forces of nature, conflict and terrorism, and executions and police conflict	99277.8	16.034	33.9601	152.108	397.734	596.229	804.286	1179.63	1345.46	1741.93	2045.32	7464.5	2610.35	3604.7	5200.1	7709.73	11255.1	17045.4	12700	6326.85	13016.1	4032.26	198556
Intracerebral hemorrhage	99104.2	133.769	734.917	2629.04	8122.46	11718.3	16167.8	14350.5	12252.4	9485.72	7797.25	180.817	5178.84	3718.83	1740.08	1422.77	709.143	1043.55	823.989	307.302	311.357	275.477	198208
Conflict and terrorism	99014.2	15.9499	33.5589	151.083	395.664	593.773	801.779	1177.35	1343.76	1739.57	2043.59	7457.72	2603.66	3600.02	5186.33	7682.52	11215.6	16971.4	12647.8	6314.17	13008.9	4030.1	198028
Protein-energy malnutrition	94056.9	92.345	662.889	1444.88	2325.64	3077.4	3066.35	2174.99	2187.44	1859.05	1361.38	3003.21	795.909	1092.71	642.392	593.272	695.656	663.201	665.63	1282.83	42767.6	23602.2	188114
Diabetes, urogenital, blood, and endocrine diseases	92945.2	194.871	1022.88	3164.4	7186.23	9734.7	10581.9	10967.7	9475.62	7112.34	5427.15	724.709	4035.76	3257.25	2710.68	2180.27	2063.96	2437.76	1608.86	935.439	3637.59	4485.16	185890
Neonatal encephalopathy due to birth asphyxia and trauma	86724.9																				484.968	86239.9	173450
HIV/AIDS resulting in other diseases	83861.1	0.720109	5.06495	23.8132	72.9282	355.77	628.05	1131.73	1657.38	2702.56	4979.47	2040.53	7954.1	11290	13327.5	12790.4	8971.74	3189.9	3407.58	2741.03	2424	4166.92	167722
Meningitis	79517.8	33.8503	200.33	781.51	1943.98	982.268	2528.27	2699.24	2430.35	2499.89	2450.11	3895.68	2169.38	1887.19	2482.49	2612.27	2713.49	3314.86	3958.71	3697.53	14601.8	21634.5	159036
Digestive diseases	75118.6	148.042	800.427	2392.15	6071.6	7573.04	7465.65	7519.42	5983.78	5873.56	5026.25	901.098	4246.58	3969.6	3067.21	2680.22	2559.8	1942.08	1434.76	1230.16	2055.77	2177.42	150237
Neonatal preterm birth	71195.2																				389.985	70805.2	142390
Maternal disorders	62602.2										918.932		5367.29	8691.98	10563.5	11437.2	11070.4	9504.2	4796.7	252.094			125204
Chronic respiratory diseases	59793.3	149.711	774.449	2751.43	5901.08	8063.82	9100.98	8123.47	5956.09	5241.42	3203.38	441.586	2144.46	1621.41	1170.78	931.785	734.141	752.371	571.942	424.891	1734.08	0	119587
Cirrhosis and other chronic liver diseases	58999	91.6337	184.371	950.152	2248.17	4308.92	5398.31	7455.86	7540.61	5318.11	5458.17	219.608	4796.38	4505	3127.38	2185.4	1902.64	1113.76	1314.42	411.247	468.87		117998
Neonatal sepsis and other neonatal infections	56416.4																				70.5966	56345.8	112833
Other communicable, maternal, neonatal, and nutritional diseases	55570.1	19.7339	87.8453	253.066	594.508	828.89	843.082	1012.6	829.745	1330.64	728.888	2393.78	956.71	793.803	839.144	892.984	997.663	1207.86	761.726	481.426	9380.62	30335.4	111140
Self-harm and interpersonal violence	52817.2	11.6562	67.4249	300.482	844.754	1654.7	2103.27	2586.85	2514.94	3040.7	3371.54	445.328	3067.13	3518.05	4187.54	4603.4	5787.6	6777.6	4569.31	1523.66	1045.69	795.61	105634
Neglected tropical diseases and malaria	52174.1	29.5913	46.8021	461.315	685.725	1235.89	1465.62	2177.65	1785.95	1462.01	1456.27	3442.86	1554.08	1576.98	1723.5	1424.31	1509.86	2180.88	2173.63	2474.56	14311.8	8994.87	104348
HIV-AIDS - Drug-susceptible Tuberculosis	52018.1	0.428078	3.10658	14.9764	45.8732	237.143	419.379	761.728	1105.48	1796.9	3301.23	1347.9	5103.11	7047.34	7769.95	7476.18	5342.69	2027.41	1872.1	1590.39	1767.92	2986.87	104036
Transport injuries	51871.5	11.894	78.333	375.976	1188.51	2141.86	2554.79	3007.4	2559.09	2873.5	2918.19	2502.81	2385.98	2560.98	2939.47	3115.03	4047.09	5333.74	4601.79	2633.36	2773.01	1268.68	103743
Other cardiovascular and circulatory diseases	50853.5	204.093	1032.95	3233.84	6428.16	7707.34	6730.66	5980.75	4607.51	3350.6	2407.37	274.139	1757.51	1438.63	1030.72	778.084	642.299	587.779	503.57	374.727	638.638	1144.1	101707
Road injuries	49911.1	11.6431	77.2784	372.312	1179.75	2122.74	2532.23	2973.22	2520.44	2811.79	2834.87	2447.91	2287.43	2410.56	2716.25	2886.28	3807.55	5076.66	4428.58	2567.44	2654.86	1191.35	99822.3
Whooping cough	47878.6									28.1641	23.7125	2252.76	26.4055	32.9491	31.0754	45.3213	67.2129	121.583	184.833	515.912	22415	22133.7	95757.2
Diabetes mellitus	45678.7	112.385	581.726	1696.98	4159.63	5966.55	6561.4	6617.22	5783.34	4340.18	3195.74	58.9255	2035.63	1530.07	1137.32	533.905	501.156	566.213	135.191	125.178	19.0533	20.9066	91357.4
Other neonatal disorders	45383																				337.994	45045	90766
Ischemic stroke	41688.1	146.707	779.451	2616.51	7255.02	9428.98	7630.69	5846.96	4200.4	1427.55	977.728	7.40951	564.955	290.847	136.781	118.925	63.997	88.4024	77.1682	10.3725	13.5545	5.66352	83376.1
Chronic obstructive pulmonary disease	38823.7	124.624	636.571	2216.98	4649.69	6100.19	6772.33	5784.51	4012.12	3178.18	1776.72	68.8155	1030.23	668.246	440.694	369.003	237.029	217.879	142.726	42.4383	354.671	0	77647.3
Other meningitis	38359.4	19.3096	108.598	433.122	1089.16	543.953	1406.2	1446.92	1260.37	1297.3	1268.98	1756.83	1126.07	977.368	1304.31	1391.53	1410.77	1660.51	1943.25	1750.09	6345.7	9819.09	76718.9
Sexually transmitted diseases excluding HIV	34661.8	6.35987	10.0668	14.3435	16.002	70.4509	5.25253	8.86675	61.9069	296.396	152.193	2062.22	107.795	68.2634	150.77	218.636	212.511	189.416	218.382	43.4306	6586.46	24162.1	69323.6
Neurological disorders	34105.7	523.425	2117.2	4615.85	6186.5	5129.63	3510.16	1665.85	943.675	483.203	349.535	240.818	391.553	769.011	889.25	528.018	1091.12	1355.32	1885.73	582.17	466.121	381.604	68211.5
Syphilis	33629.5	3.29608	5.01492	6.76006	8.11725	21.316	1.7073	2.44091	22.5875	188.428	91.8981	2062.22	37.6653	35.8878	38.6701	119.066	52.0755	67.2682	85.3017	31.2145	6586.46	24162.1	67258.9
Cervical cancer	33473.2	13.0545	79.7527	397.992	1217.32	569.032	2845.92	3719.91	4704.91	4709.11	5040.56		4082.76	3058.46	1802.9	811.075	301.77	109.119	9.53588				66946.4
Malaria	30880.9	15.8206	21.4344	205.339	260.991	488.116	614.863	790.814	763.902	520.17	550.188	1553.42	493.479	609.398	612.029	512.539	568.135	879.458	858.505	1009.84	11231.1	8321.37	61761.8
Interpersonal violence	30258.9	2.98743	7.15671	37.7647	106.282	409.845	564.745	837.914	857.869	1186.39	1507.94	445.328	1438.38	1986.01	2639.63	3091.79	4095.8	4987.13	3395.98	818.677	1045.69	795.61	60517.8
Hypertensive heart disease	29780.5	162.576	668.022	1907.05	3818.65	4681.61	4185.34	3927.19	2956.02	2387.63	1723.4	7.27243	1158.21	859.496	518.875	316.933	200.584	149.907	122.085	15.5482	10.6644	3.42496	59561
Meningococcal meningitis	28866.1	9.87142	62.3791	232.215	551.232	271.399	685.626	780.73	733.803	761.679	752.196	1615.16	651.506	577.957	779.64	857.189	984.267	1302.92	1594.58	1513.66	5974.22	8173.91	57732.3
Pedestrian road injuries	27154.5	7.41318	51.5284	263.134	673.246	1200.36	1413.42	1653.75	1388.71	1532.27	1533.04	1388.05	1232.72	1276	1414.49	1514.23	1988.04	2655.26	2349.95	1456.6	1532.48	629.861	54309.1
Other non-communicable diseases	26012.6	36.0111	89.3198	197.27	382.339	1034.17	534.47	658.948	363.484	652.895	373.63	213.699	408.164	183.952	123.969	271.1	174.135	259.11	439.064	218.998	1860.01	17537.9	52025.2
Tetanus	25633.7	1.44089	8.4043	21.4183	197.607	471.211	238.969	803.178	614.42	1099.56	974.319	470.138	1290.48	991.021	899.294	984.739	1043.99	1052.75	1448.87	783.22	605.419	11633.3	51267.4
Falls	25293.7	144.937	669.24	1852.79	3140.36	3159.55	2528.02	2102.22	1577.51	1227.68	1050.74	845.488	698.792	597.745	580.667	485.074	419.792	392.457	403.248	1267.9	1156.2	993.26	50587.3
Paralytic ileus and intestinal obstruction	24291.4	44.6061	247.885	756.206	1415.89	1372.32	2173.47	2857.59	1729.04	1991	1425.63	370.906	1412.91	1314.04	1290.45	836.269	889.11	637.156	432.131	492.816	424.567	2177.42	48582.8
Self-harm	22558.3	8.66881	60.2682	262.717	738.472	1244.86	1538.52	1748.94	1657.07	1854.31	1863.6		1628.76	1532.04	1547.91	1511.61	1691.81	1790.47	1173.33	704.979			45116.7
Alzheimer disease and other dementias	22053	500.4	2046.22	4230.7	5709.68	4671.63	2580.79	1278.24	562.459	281.081	148.25	0	41.5029	2.10263	0	0	0	0	0	0	0	0	44106.1
Chronic kidney disease	21576.1	42.0705	272.754	940.204	2060.2	2202.41	2558.34	2251.98	2170.51	1527.81	1032.2	181.552	752.144	774.959	706.797	663.976	843.959	982.812	653.555	246.213	408.03	303.634	43152.2
Motor vehicle road injuries	21135.7	3.94284	24.0127	102.507	474.564	865.839	1051.9	1241.03	1067.3	1204.75	1222.16	990.817	990.194	1056.84	1194.99	1259.24	1653.89	2196.88	1918.18	1032.47	1050.03	534.223	42271.5
Cirrhosis and other chronic liver diseases due to hepatitis B	20636.9	28.6693	62.5785	340.195	819.091	1636.71	1982.54	2682.44	2718.61	1873.57	1885.06	6.22403	1720.19	1720.56	1246.01	829.917	663.85	275.732	120.561	19.5921	4.82087		41273.8
Self-harm by other specified means	20395.8	7.8306	55.7454	246.754	696.324	1175.31	1446.46	1640.3	1548.46	1718.58	1704.86		1476.04	1359.19	1359.96	1302.7	1440	1514.83	1040.49	661.998			40791.7
Physical violence by other means	20299.9	2.17605	4.3205	24.2005	66.4114	294.678	303.837	646.095	344.406	803.656	931.571	379.609	974.218	1202.84	1924.16	1916.73	2626.09	3414.87	2298.8	616.841	825.414	698.918	40599.7
Peptic ulcer disease	19481.8	34.86	212.947	686.838	2009.83	2604.86	2165.42	1942.35	1849.57	1610.09	1503.69	87.9522	1087.45	909.954	659.724	578.422	498.357	355.501	255.548	125.46	302.99		38963.6
Other neoplasms	19386.5	9.29433	45.7354	151.792	363.21	605.405	1031.97	1189.97	1132.62	1416.63	1583.56	210.849	1709.25	2111.21	1772.57	1763.02	1260.82	1095.94	1273.45	303.328	259.54	96.3565	38773
Asthma	19188.4	22.0511	120.338	482.969	1136.1	1813.36	2143.66	2163.85	1799.18	1922.24	1327.22	310.431	1031.38	875.556	665.872	500.021	455.113	485.496	388.383	347.29	1197.87		38376.8
Prostate cancer	18726.3	67.7282	320.711	999.284	2109.64	2335.14	4742.46	3772.22	2664.3	924.374	482.093		180.314	59.6036	30.0351	16.8388	11.2901	7.21621	3.10361				37452.7
Drowning	17696.5	7.5482	26.5418	123.615	309.144	537.593	581.19	579.12	500.009	567.214	489.747	2059.45	486.903	563.594	608.114	600.023	783.579	1099.87	1298.44	2158.41	3611.05	705.401	35393.1
Congenital birth defects	14540							12.9323	16.5292	21.6201	20.2984	201.176	23.6008	45.9913	45.6363	59.7745	105.027	124.635	154.424	184.111	1350.16	12174.1	29080
Indirect maternal deaths	14440.1										227.621		1198.51	1761.1	2262.8	2769.99	2786.99	2298.25	1083.31	51.5213			28880.2
Cirrhosis and other chronic liver diseases due to alcohol use	14377.4	26.7543	53.7365	273.617	634.106	1185.56	1424.38	1911.21	1909.89	1381.89	1502.9		1330.23	1191.7	769.259	421.805	238.704	94.3787	27.2743				28754.8
Cirrhosis and other chronic liver diseases due to hepatitis C	14080	17.9294	36.9248	192.183	455.211	928.472	1288	1882.05	1956.77	1411.97	1453.61	4.80257	1263.63	1153.38	780.887	532.56	426.533	183.375	92.4781	15.4663	3.71114		28159.9
Fire, heat, and hot substances	13935	12.589	62.7805	252.698	630.117	902.174	918.072	978.691	730.467	646.509	677.742	771.704	493.531	425.68	410.882	354.983	376.252	457.939	348.164	508.135	2692.64	1283.28	27870.1
Colon and rectum cancer	13660.5	58.9419	278.29	781.055	1752.24	1555.41	1669.31	1800.56	1287.94	1478.34	897.566		726.168	497.096	231.28	190.232	142.511	261.516	52.0381				27321
Maternal hemorrhage	13211.5										158.2		1193.31	2321.15	2727.96	2507.56	2082.66	1514.85	671.657	34.1579			26423
Hemoglobinopathies and hemolytic anemias	12813.9	11.4384	53.9191	179.565	399.861	503.795	498.748	407.058	402.605	391.131	338.895	366.981	440.216	315.004	307.14	394.494	419.681	408.813	387.23	393.194	2879.09	3315.05	25627.8
Liver cancer	12808.4	7.74792	52.7034	262.11	788.884	634.591	1437.45	1755.69	1628.51	1354.27	1233.66	30.0858	979.858	721.148	621.459	480.214	337.034	227.68	165.078	90.2371			25616.8
Breast cancer	12385.7	15.1092	48.8739	179.658	507.821	453.511	947.091	1615.43	1108.85	1428.35	1840.9		1463.74	1192.56	936.646	353.764	155.834	79.0931	58.458				24771.4
Stomach cancer	12130.8	18.3574	77.5335	283.656	781.619	891.087	2003.41	1767.25	2162.81	1120.62	1097.27		753.28	497.082	279.44	211.526	82.3703	63.6343	39.8424				24261.6
Acute hepatitis	11310	3.77531	37.3429	139.121	373.424	585.309	645.032	776.928	567.15	937.846	496.258	248.797	809.6	689.136	663.785	648.306	721.324	977.002	490.83	393.058	746.166	359.765	22619.9
Non-Hodgkin lymphoma	10891.7	4.05785	26.3891	118.099	306.155	176.288	527.78	756.406	726.468	529.482	766.367	1395.85	661.504	702.746	604.378	473.089	318.064	340.494	436.746	1182.93	766.433	71.9574	21783.4
Multidrug-resistant tuberculosis without extensive drug resistance	10556.9	19.4285	60.8423	225.712	480.624	690.833	757.391	858.855	805.503	1026.09	944.04	65.5429	737.826	650.325	653.317	637.189	600.63	502.737	292.043	85.9555	265.905	196.091	21113.8
Cirrhosis and other chronic liver diseases due to other causes	9904.74	18.2806	31.1309	144.158	339.762	558.183	703.391	980.15	955.333	650.682	616.593	208.581	482.328	439.363	331.217	401.123	573.554	560.274	1074.11	376.189	460.338		19809.5
Hemolytic disease and other neonatal jaundice	9737.94																				5.52662	9732.41	19475.9
Other unspecified infectious diseases	9598.4	9.59871	40.4355	99.6019	205.083	173.129	192.798	226.809	200.688	96.4015	80.4372	82.7652	39.3151	36.4032	24.5895	26.0421	63.8279	41.4431	52.5146	44.9379	2048	5813.58	19196.8
Epilepsy	9515.83	11.6774	11.3178	178.656	71.4313	79.7004	698.233	234.738	273.777	109.825	119.451	196.813	276.971	702.921	836.528	485.401	1044.44	1281.82	1783.8	512.689	336.345	269.295	19031.7
Exposure to mechanical forces	9417.56	12.8203	49.4275	115.529	207.445	247.041	247.19	288.277	314.964	443.385	561.164	480.303	714.191	347.599	554.707	626.354	765.137	706.068	614.411	263.471	736.26	1121.81	18835.1
Other digestive diseases	9363.4	23.1882	119.654	336.701	936.36	1033.82	923.674	793.841	773.201	671.932	598.59	147.905	504.635	432.38	313.796	318.381	280.081	213.077	215.185	159.785	567.217		18726.8
Maternal obstructed labor and uterine rupture	9361.16										129.494		862.115	1494.31	1754.18	1725.1	1548.98	1239.12	580.394	27.4717			18722.3
Other nutritional deficiencies	9287.09	39.1407	222.213	513.581	738.611	675.386	632.357	718.101	543.151	633.235	788.536	84.0509	647.454	342.97	368.893	394.041	311.576	382.986	187.635	67.3767	720.52	275.276	18574.2
Acute hepatitis B	9093.89	1.54842	18.9949	85.9205	278.516	487.93	555.725	685.502	507.569	855.368	460.569	55.0116	762.56	656.179	634.166	618.611	669.725	842.344	332.313	140.723	223.3	221.314	18187.8
Intestinal infectious diseases	9022.49	1.23252	3.89369	14.3898	31.0375	56.6026	56.6491	62.3785	55.5357	57.8503	69.941	2159.69	99.1183	115.102	155.484	235.112	354.245	551.303	891.739	1457.09	1884.26	709.833	18045
Maternal abortion, miscarriage, and ectopic pregnancy	8836.17										139.723		716.479	967.355	1196.36	1497.57	1660.99	1679.85	929.966	47.8733			17672.3
Animal contact	8502.17	5.28208	21.8035	94.3725	279.367	461.153	659.873	707.274	637.2	637.344	579.85	625.56	426.858	330.685	273.164	243.932	250.234	185.395	241.975	485.959	1071.87	283.019	17004.3
Urinary diseases and male infertility	8231.04	22.8588	90.6607	225.866	403.39	726.891	703.142	1126.58	764.749	533.688	487.817	68.2573	485.323	381.966	371.447	311.553	197.542	383.99	364.073	95.0159	155.662	330.575	16462.1
Esophageal cancer	8193.01	27.8712	55.3382	212.8	838.322	1138.61	1039.25	1202.64	961.308	910.254	587.704		470.25	392.623	89.8968	93.3929	41.6683	60.0939	70.9962				16386
Rheumatic heart disease	8100.16	5.76976	34.1093	139.113	382.306	683.429	866.166	1013.83	939.077	843.981	660.755	107.835	494.839	416.654	285.622	198.968	167.702	217.541	229.503	241.451	171.501		16200.3
Maternal hypertensive disorders	7835.59										93.343		554.794	941.915	1196.98	1364.37	1435.23	1401.35	799.861	47.7521			15671.2
Tracheal, bronchus, and lung cancer	7793.82	17.7093	65.0778	294.641	444.454	988.227	1204.96	1358.62	1087.62	787.009	587.649		370.319	281.197	129.26	86.3504	38.6105	39.1704	12.9377				15587.6
Adverse effects of medical treatment	7364.11	11.0324	43.1978	124.748	260.041	343.602	346.158	358.383	333.123	294.138	253.84	276.114	295.763	282.989	286.639	290.852	309.28	338.608	264.067	250.03	1157.03	1244.47	14728.2
Typhoid fever	7087.67	0.228821	1.27675	5.75968	18.228	32.962	39.5976	46.1775	41.4089	44.4038	56.2739	2011.1	68.9723	86.7949	122.696	200.893	322.254	508.694	833.48	1348.11	1275.77	22.5841	14175.3
H influenzae type B meningitis	7071.63	1.8129	12.4646	51.191	127.535	64.773	165.329	181.72	169.333	174.041	170.317	318.899	153.854	132.912	174.63	176.062	169.001	191.605	229.411	246.318	1533.18	2627.23	14143.3
Skin and subcutaneous diseases	6982.11	36.0111	89.3198	197.27	382.339	1034.17	534.47	646.016	346.955	631.275	353.332	12.5225	384.563	137.961	78.3332	211.326	69.1076	134.475	284.641	34.8872	509.85	873.284	13964.2
Poisonings	6749.72	1.25605	8.75742	41.3506	126.6	222.661	290.19	360.383	361.853	365.234	359.588	216.359	310.206	287.609	236.732	209.889	205.48	206.761	155.333	147.534	1196.35	1439.6	13499.4
Other exposure to mechanical forces	6464.35	7.25277	29.773	78.7322	143.695	165.774	181.112	222.742	256.107	367.142	492.324	418.881	509.159	229.44	408.231	345.186	372.33	490.174	398.915	205.927	642.202	499.248	12928.7
Venomous animal contact	6458.06	3.39228	15.5823	73.5526	227.461	390.904	577.873	616.878	556.308	533.174	468.167	438.986	328.688	259.385	207.15	176.876	151.162	89.2846	122.627	334.665	712.695	173.253	12916.1
Physical violence by firearm	6163.98	0.315287	0.458159	1.51521	6.02881	22.208	55.5478	72.1999	197.683	310.207	334.916	53.6335	238.925	523.364	539.819	835.766	927.019	1015.18	705.979	115.068	126.145	81.9962	12328
Chronic kidney disease due to other causes	6135.45	9.53191	66.0528	235.141	498.111	509.061	589.573	506.793	494.354	382.922	276.404	88.4307	211.665	235.702	235.612	242.955	338.333	432.003	301.902	115.263	207.159	158.486	12270.9
Chronic kidney disease due to diabetes mellitus	6009.79	10.9864	64.7421	228.026	564.62	684.108	833.769	786.702	803.486	566.232	362.442	5.20312	260.298	245.099	193.321	138.388	120.712	82.3888	33.5852	8.43075	10.3514	6.8954	12019.6
Encephalitis	5702.47	0.827527	3.18755	6.03586	10.5885	13.5544	10.5602	11.1246	76.6251	9.1488	7.08988	240.473	16.2782	73.402	20.0122	22.7777	136.207	39.8692	135.643	169.921	1408.44	3290.7	11404.9
Other urinary diseases	5697.72	13.4406	61.5866	150.578	278.268	476.817	467.623	788.187	534.943	383.695	353.642	46.6357	358.077	286.828	281.738	224.278	132.437	255.362	221.709	60.4399	108.779	212.656	11395.4
Foreign body	5667.18	4.35616	15.4588	44.5641	93.9896	118.976	121.392	134.28	138.402	140.628	139.791	257.026	140.983	186.927	191.816	184.091	181.539	203.762	164.56	241.515	1132.3	1830.82	11334.4
Cardiomyopathy and myocarditis	5546.12	9.84198	45.0097	157.519	315.828	421.509	427.438	482.681	482.398	488.16	426.382	62.9718	373.306	353.569	256.864	189.641	146.742	112.002	104.335	78.9283	227.273	383.721	11092.2
Schistosomiasis	5541.15	2.08067	13.5194	63.0258	179.542	347.477	456.598	560.452	525.412	538.205	467.91	85.7966	395.61	374.201	324.387	265.579	241.227	210.021	164.662	162.708	162.741	0	11082.3
Mental disorders	5330.1	7.55209	38.6529	83.9626	204.704	615.858	129.309	292.786	496.758	477.266	494.271	0.206119	522.147	541.617	504.376	412.504	333.451	106.215	66.9143	0.262879	0	1.28292	10660.2
Pneumococcal meningitis	5220.57	2.85645	16.8883	64.9812	176.045	102.143	271.108	289.865	266.849	266.863	258.622	204.8	237.945	198.954	223.916	187.49	149.446	159.824	191.469	187.467	748.728	1014.31	10441.1
Chronic kidney disease due to glomerulonephritis	5082.9	5.30066	34.6045	127.269	324.463	363.792	452.523	405.522	390.106	287.276	229.772	85.6123	183.259	213.55	221.349	240.866	343.845	432.032	300.501	117.782	187.072	136.399	10165.8
Pyoderma	5081.99	21.9714	51.279	113.012	218.395	633.357	341.289	440.979	251.515	473.849	262.788	8.2513	301.156	110.085	63.8813	174.123	54.336	99.2809	197.053	22.8686	407.549	834.975	10164
Pulmonary aspiration and foreign body in airway	5046.37	3.89515	13.8573	39.8182	84.691	106.432	110.633	122.734	124.854	125.049	123.566	214.617	124.26	140.488	138.474	135.336	148.815	170.354	138.832	200.642	1018.03	1760.99	10092.7
Ovarian cancer	4952.49	2.52852	17.8605	85.8301	262.634	152.57	674.636	380.876	730.522	712.457	714.161		377.914	363.823	191.911	124.111	70.9404	45.422	44.2946				9904.98
Neural tube defects	4887.15							1.1525	1.30172	1.94026	1.72025	38.0718	2.34678	4.21915	3.53042	6.56904	10.3649	15.1432	22.1149	32.8556	309.963	4435.85	9774.3
Other unintentional injuries	4821.27	5.21589	14.2311	33.373	73.2425	110.122	119.3	193.173	196.246	168.455	226.278	390.679	187.863	187.24	235.005	286.777	323.468	351.29	435.543	479.734	550.526	253.503	9642.53
Pancreatic cancer	4646.76	7.62459	37.2233	125.972	280.186	474.559	760.482	797.301	637.26	522.164	320.415		227.253	217.49	112.677	73.0228	28.2228	17.1894	7.71512				9293.52
Yellow fever	4579.53	0.0795795	0.585266	2.8032	9.7532	20.7105	31.5368	51.5832	67.5115	92.7057	111.916	676.383	138.351	185.479	227.044	284.639	388.844	542.659	645.202	721.201	340.079	40.466	9159.07
Sudden infant death syndrome	4490.5																					4490.5	8981
Leukemia	4414.25	4.21488	18.2089	54.8027	126.031	231.04	332.231	402.813	363.054	346.71	284.609	239.727	220.113	177.183	177.537	148.219	185.384	217.142	325.855	267.789	224.949	66.6412	8828.51
Other cardiomyopathy	4402.79	7.81215	37.4618	134.445	275.572	364.546	365.616	408.528	402.391	391.123	337.778	45.5521	281.368	261.373	186.685	141.221	101.809	77.7888	71.4451	60.3509	148.671	301.256	8805.58
Chronic kidney disease due to hypertension	4347.98	16.2516	107.355	349.768	673.009	645.448	682.479	552.96	482.562	291.379	163.587	2.30566	96.9223	80.6082	56.5158	41.7674	41.0694	36.3885	17.5666	4.73751	3.44694	1.85313	8695.96
Appendicitis	4323.65	3.55465	20.1956	64.6122	189.644	256.228	242.049	249.673	260.6	261.071	230.838	206.192	208.267	210.965	194.81	227.965	241.391	252.684	314.322	278.096	410.491		8647.3
Gallbladder and biliary diseases	4307.19	11.0819	65.1665	189.842	524.626	641.614	521.416	481.532	413.671	327.948	277.137	10.5426	190.601	155.338	133.903	116.775	97.3593	64.329	38.4203	18.2171	27.6715		8614.38
Other maternal disorders	4148.38										91.8781		429.219	585.266	652.758	671.833	671.326	648.079	374.569	23.4527			8296.76
Alcohol use disorders	4065.83	6.47331	26.5016	66.3834	167.119	562.816	75.8338	249.937	454.08	450.048	462.809		464.484	326.859	251.744	249.36	208.593	28.9415	13.8458				8131.66
Liver cancer due to hepatitis C	3976.08	3.85473	25.4193	121.554	348.958	265.59	538.893	633.495	572.577	443.812	385.526	0.660869	264.309	148.174	96.8691	64.697	36.1731	15.7487	6.6599	3.1117			7952.16
Visceral leishmaniasis	3966.65	10.8047	8.23155	176.923	204.989	321.96	283.305	556.845	276.315	94.6761	107.345	108.198	120.494	172.741	181.147	117.16	134.099	246.652	150.235	80.1147	246.279	368.132	7933.29
Leishmaniasis	3966.65	10.8047	8.23155	176.923	204.989	321.96	283.305	556.845	276.315	94.6761	107.345	108.198	120.494	172.741	181.147	117.16	134.099	246.652	150.235	80.1147	246.279	368.132	7933.29
Rabies	3941.54	0.0366684	0.0251066	2.38102	4.90869	13.3338	21.6389	141.794	71.3647	120.959	123.575	751.433	316.263	144.857	280.033	149.783	82.8815	225.913	288.845	370.068	798.96	32.4879	7883.08
Other congenital birth defects	3846.66							3.46123	4.66804	5.63586	5.21536	67.3676	6.59077	8.61323	10.2473	14.0307	24.1142	29.7049	44.6612	53.9095	522.144	3046.29	7693.32
Physical violence by sharp object	3795.09	0.496091	2.37806	12.049	33.842	92.9586	205.36	119.618	315.78	72.5268	241.45	12.086	225.232	259.805	175.66	339.29	542.684	557.081	391.201	86.7681	94.1287	14.6958	7590.18
Uterine cancer	3661.96	1.82129	12.2135	59.5237	181.101	137.452	409.101	582.762	605.356	456.259	590.457		264.777	163.683	93.348	54.0773	28.5929	17.7768	3.65809				7323.92
Inguinal, femoral, and abdominal hernia	3571.6	7.23479	18.0539	29.0505	72.5626	520.467	498.423	391.042	190.058	229.873	269.599	25.9972	190.187	354.961	26.7053	140.833	183.24	183.973	23.3885	93.1612	122.784		7143.19
Gastritis and duodenitis	3555.32	13.6033	59.7117	152.5	389.235	449.98	341.071	285.683	290.117	291.433	277.798	19.5129	220.365	190.258	160.401	143.058	89.9425	58.0947	51.0832	22.337	49.1384		7110.65
Liver cancer due to hepatitis B	3542.3	1.19948	8.22494	41.4464	126.511	111.257	292.447	399.801	418.706	387.32	375.889	4.02648	332.322	278.873	263.117	217.202	147.329	78.7042	40.0432	17.8759			7084.59
Congenital heart anomalies	3530.31							3.55272	4.91503	6.69262	6.74138	76.6059	8.23171	26.3179	25.5411	31.3841	58.8604	66.8385	70.8369	79.6413	360.431	2703.72	7060.62
Thalassemias	3497.79	9.38515e-14	4.52066e-12	1.7623e-10	4.51966e-09	5.79885e-08	6.87403e-07	5.32065e-06	4.99193e-05	0.000410088	0.00271933	100.49	0.0182535	0.0425297	0.116707	0.349733	0.707309	1.40114	4.72413	26.3487	1396.56	1967.02	6995.57
HIV/AIDS - Multidrug-resistant Tuberculosis without extensive drug resistance	3489.78	0.0305884	0.21992	1.06571	3.2111	15.8835	28.1146	51.7689	75.4337	123.142	229.95	97.661	347.012	467.661	505.813	485.883	339.181	128.36	143.98	119.794	119.303	206.31	6979.56
Brain and nervous system cancer	3476.24	0.994462	7.29153	30.3781	94.3584	180.595	250.768	314.811	354.689	307.818	264.809	206.276	217.15	191.084	151.757	136.564	100.178	114.337	122.428	211.397	178.601	39.9533	6952.48
Endocarditis	3463.49	12.4715	54.3395	145.883	285.171	338.246	317.707	322.096	270.644	215.977	182.532	43.9922	157.685	182.111	150.129	135.968	153.758	148.412	137.556	85.7773	53.7283	69.3018	6926.97
Liver cancer due to other causes	3399.44	1.97615	13.4717	67.528	206.551	157.346	342.489	395.666	372.86	322.21	282.642	25.3985	231.279	184.261	180.677	159.895	139.775	128.532	117.629	69.2495			6798.87
G6PD deficiency	3381.2	0.124519	0.97166	5.50847	22.3753	49.9749	78.5154	98.4988	137.19	179.761	186.001	112.351	292.838	209.466	206.059	264.083	254.457	206.537	175.439	165.254	444.444	291.347	6762.39
Endocrine, metabolic, blood, and immune disorders	3368.6	5.1863	19.732	118.437	156.258	323.799	255.168	513.431	350.343	184.92	159.388	40.907	81.2756	69.5284	63.0593	176.863	30.6847	32.8951	46.2989	65.5403	164.413	510.469	6737.19
Other hemoglobinopathies and hemolytic anemias	3343.83	11.3139	52.9474	174.056	377.486	453.82	420.225	308.525	265.205	210.417	149.183	21.3303	137.236	91.3633	74.4112	71.7758	64.8553	59.8617	44.179	42.4521	103.637	209.553	6687.67
Bladder cancer	3258.14	9.64213	47.027	159.287	340.588	334.453	604.283	495.903	434.328	314.641	248.648		98.9311	62.6094	33.3475	37.2679	9.29012	19.4264	8.46568				6516.27
Lip and oral cavity cancer	3203.93	6.61786	42.6523	124.108	274.881	332.46	319.566	404.714	477.744	408.339	181.723		146.83	116.175	142.564	51.8056	68.6662	68.8466	36.2342				6407.85
Maternal sepsis and other maternal infections	3085.7										47.8794		257.327	385.955	487.182	593.21	590.289	479.284	232.657	11.916			6171.4
Aortic aneurysm	2752.27	7.26082	41.6366	132.813	296.327	418.505	399.496	385.64	289.936	211.371	143.274		112.462	95.0815	71.1635	49.2015	40.0659	30.7956	27.2424				5504.54
Thyroid cancer	2675.08	1.38976	8.67388	38.5102	111.06	101.845	258.993	286.815	299.839	453.04	334.687		299.578	163.351	98.3608	82.0728	56.8739	49.8119	12.8404	17.3444			5350.17
Varicella and herpes zoster	2604.11	21.4917	61.4252	125.944	141.868	97.8197	57.0649	64.6155	31.3702	27.2968	22.3663	270.773	26.4683	23.4004	37.2134	48.9931	48.8979	44.4322	39.4582	99.2213	676.98	637.005	5208.21
Sickle cell disorders	2591.1	2.62713e-09	1.05516e-07	3.28099e-06	7.0081e-05	0.000720932	0.00697696	0.0341275	0.210281	0.951913	3.70782	132.81	10.1232	14.1318	26.5527	58.2851	99.6622	141.013	162.888	159.139	934.452	847.131	5182.2
Nasopharynx cancer	2461.67	1.37097	7.57976	33.5135	106.668	50.8926	79.7418	258.395	386.002	418.07	312.527	8.27924	204.687	180.007	100.326	78.7778	81.154	48.1467	79.2125	26.3178			4923.34
Urinary tract infections	2390.98	9.21997	28.1785	73.2731	120.971	240.656	227.499	323.076	219.576	142.563	127.606	17.7921	120.977	89.9454	85.215	81.882	59.6153	113.023	117.042	28.0664	46.8829	117.919	4781.96
Hodgkin lymphoma	2359.32	0.252799	2.58121	14.9055	50.4016	17.6165	139.05	238.802	131.138	193.593	109.391	133.082	142.602	160.851	179.05	143.416	132.427	96.5675	162.035	252.55	55.3123	3.69507	4718.64
Multiple myeloma	2356.57	0.947426	6.11013	23.7921	65.464	114.437	261.103	494.419	425.713	283.405	223.273		140.419	143.818	67.9318	54.4256	20.838	14.055	16.4144				4713.13
Atrial fibrillation and flutter	2346.89	36.0911	182.353	511.547	673.316	381.517	247.649	148.637	76.8243	38.9207	22.5145	0	14.001	8.57395	3.85826	1.09189	0	0	0	0	0	0	4693.79
Inflammatory bowel disease	2343.08	4.58589	24.2311	68.4815	199.373	242.837	213.67	173.258	167.636	174.653	151.628	25.2988	137.614	120.932	95.9282	122.625	115.154	90.9585	62.9299	30.1695	121.119		4686.16
Pancreatitis	2230.58	1.41785	8.85054	33.2111	108.12	154.516	148.148	157.018	159.895	195.603	202.211	3.8774	228.235	233.427	161.247	172.775	143.476	71.3804	32.4354	6.60662	8.13515		4461.17
Self-harm by firearm	2162.49	0.838214	4.52283	15.963	42.1482	69.5488	92.0614	108.635	108.602	135.73	158.747		152.713	172.848	187.952	208.913	251.81	275.644	132.836	42.9814			4324.99
Larynx cancer	2110.1	1.83188	10.8587	46.9372	145.975	115.377	175.936	405.36	351.079	292.801	258.189		128.735	49.9153	49.9792	48.8854	10.3699	13.0283	4.83677				4220.19
Non-venomous animal contact	2044.1	1.8898	6.2212	20.8199	51.9053	70.2498	82.0001	90.3963	80.892	104.17	111.682	186.574	98.1707	71.2993	66.0143	67.0557	99.0719	96.1104	119.348	151.295	359.173	109.766	4088.21
Other transport injuries	1960.35	0.250808	1.05464	3.66383	8.755	19.1191	22.5579	34.1847	38.6492	61.7038	83.315	54.9028	98.5538	150.421	223.221	228.756	239.54	257.083	173.212	65.9211	118.152	77.3303	3920.69
Diphtheria	1957.08									23.7961	32.1335	139.087	28.9143	26.9341	25.0684	17.5554	20.8857	23.9789	39.6421	83.9788	1020.85	474.252	3914.16
Liver cancer due to alcohol use	1890.59	0.717558	5.58747	31.5818	106.864	100.398	263.617	326.728	264.367	200.93	189.603		151.949	109.839	80.7953	38.4201	13.7568	4.69496	0.745668				3781.19
Environmental heat and cold exposure	1869.6	3.45179	16.2508	31.1306	55.7916	221.903	89.6556	81.1259	69.4538	66.5054	76.6721	73.9661	80.7679	52.2896	87.9152	90.2075	104.088	85.0978	195.165	61.5161	146.077	180.568	3739.2
Unintentional firearm injuries	1824.45	4.1794	15.1349	23.4642	38.7417	57.5851	43.2622	43.0518	39.3427	42.0294	46.2666	25.3352	181.167	95.9586	117.356	246.316	349.963	178.151	157.616	28.9964	45.4014	45.134	3648.9
Other pharynx cancer	1787.65	0.603903	3.77105	17.6266	53.6966	74.9014	165.244	266.912	294.738	262.916	225.227		121.923	117.853	55.0993	60.3494	33.4946	8.6297	24.6686				3575.31
Musculoskeletal disorders	1777.22	3.25922	14.6572	42.3671	88.2432	136.529	136.038	144.074	125.143	117.303	102.303	51.8719	108.404	105.009	99.8663	101.654	104.532	105.961	106.141	83.8688			3554.45
Malignant skin melanoma	1739.81	2.85711	13.9227	54.2818	132.696	66.6164	234.269	279.022	327.768	154.594	205.843		125.165	40.9874	40.669	20.6975	16.6162	13.0683	10.7387				3479.62
Acute hepatitis E	1717.18	2.0855	17.0387	48.6192	83.0191	77.6693	66.0209	60.652	34.1116	44.2709	20.057	178.251	28.7142	21.9487	20.7003	22.3926	41.8507	116.047	146.185	239.873	447.676		3434.37
Vascular intestinal disorders	1650.57	3.90946	23.7314	74.7086	225.953	296.396	238.316	187.442	149.997	119.956	89.1255	2.91362	66.3132	47.3468	30.2449	23.1121	21.6935	14.9285	9.31799	3.51384	21.6547		3301.14
Gallbladder and biliary tract cancer	1621.07	2.56953	12.2806	46.0499	122.746	149.375	162.278	357.547	204.907	244.534	117.882		82.0943	54.6857	23.7028	27.6718	4.1877	3.90193	4.65151				3242.13
Other intestinal infectious diseases	1598.01	0.995745	2.57282	8.43214	12.1855	22.4906	15.5978	14.3043	12.0745	11.0098	10.6419	52.077	26.4554	23.6105	26.1772	23.6868	16.2237	20.0795	19.5965	24.2288	569.335	686.231	3196.01
Intestinal nematode infections	1546.4	0.133517	0.470892	0.941447	3.42961	5.82234	7.3447	5.36268	7.00497	6.47726	7.58734	147.427	5.11445	4.88928	6.5796	7.0587	5.7174	7.51654	11.537	37.4719	1171.49	97.02	3092.8
Ascariasis	1546.4	0.133517	0.470892	0.941447	3.42961	5.82234	7.3447	5.36268	7.00497	6.47726	7.58734	147.427	5.11445	4.88928	6.5796	7.0587	5.7174	7.51654	11.537	37.4719	1171.49	97.02	3092.8
Other leukemia	1482.47	2.70838	10.192	29.8136	69.4595	121.884	117.325	72.1217	98.2811	155.679	103.671	58.0057	78.4987	59.1376	36.7551	25.1663	31.5724	90.5737	171.508	60.4272	68.7541	20.9336	2964.94
Parkinson disease	1320.66	10.7775	57.0323	197.294	380.66	336.036	178.709	84.6489	36.0777	15.8186	8.95473	0	5.8822	4.33002	2.6688	1.30886	0.423505	0.0382641	0	0	0	0	2641.32
Non-melanoma skin cancer (squamous-cell carcinoma)	1297.27	8.57081	28.9362	71.9265	136.712	165.892	171.706	172.483	147.562	103.717	81.9079		60.3614	46.5148	31.8811	25.7915	16.315	14.7579	12.2296				2594.53
Non-melanoma skin cancer	1297.27	8.57081	28.9362	71.9265	136.712	165.892	171.706	172.483	147.562	103.717	81.9079		60.3614	46.5148	31.8811	25.7915	16.315	14.7579	12.2296				2594.53
Decubitus ulcer	1293.57	12.1502	32.9939	73.4213	138.976	325.434	154.93	153.152	64.4102	99.6655	57.3685	1.6437	51.8473	13.4746	6.69664	15.3733	5.78413	13.0628	31.8802	3.93913	37.3703		2587.15
Drug use disorders	1257.18	1.07878	12.1513	17.5792	37.5854	53.0418	53.4751	42.8492	42.6786	27.2174	31.4619	0	56.7834	213.799	251.693	162.21	123.762	76.2335	52.3	0	0	1.28292	2514.36
Late maternal deaths	1193.17										25.4807		118.401	159.594	181.586	195.571	199.57	191.38	113.879	7.71366			2386.35
Gynecological diseases	1191.78	0.851491	3.72371	2.12484	4.1773	7.65634	0.864078	47.8294	0.5832	131.272	210.886		238.699	183.505	122.441	96.4834	66.7459	57.8977	16.0396				2383.56
Acute lymphoid leukemia	1144.47	0.467749	2.01191	7.07294	17.1048	10.3221	65.4605	45.9933	101.939	94.0119	45.7537	121.684	39.6352	27.0302	38.7928	40.3232	58.1944	52.7406	73.4968	153.428	119.422	29.5879	2288.95
Unintentional suffocation	1128.76	1.38809	4.51957	13.3329	25.0079	23.6819	22.8159	22.4832	19.5143	34.2138	22.5738	36.0871	23.8648	22.201	29.1205	34.8522	42.8428	37.7432	57.8794	28.5473	48.6564	577.432	2257.52
Kidney cancer	1099.19	1.4607	5.98593	18.1	45.2048	69.2709	80.6365	112.907	92.1212	133.773	79.411	51.3835	45.5283	36.5244	29.3286	24.3732	14.9305	8.98728	16.7388	20.8297	186.38	25.3179	2198.39
Other chronic respiratory diseases	1055.11	1.67352	9.28372	23.0016	48.783	53.9231	70.7738	70.616	66.6636	70.8742	56.529	57.9584	53.6994	55.97	48.618	51.1054	34.8356	41.8445	36.0987	32.8225	170.038	0	2110.22
Other musculoskeletal disorders	1027.68	1.54455	6.73912	17.4126	31.0809	40.6898	40.2857	44.887	44.0224	47.8754	51.7106	37.4689	70.5426	79.4848	83.5197	87.5021	90.5059	93.5881	92.4631	66.36			2055.37
Motorcyclist road injuries	1024.72	0.0707811	0.362527	1.4681	17.4614	31.1087	39.5905	43.979	36.703	42.662	44.4689	37.9161	36.4953	48.8029	72.2036	77.4621	120.097	161.442	109.716	42.7202	41.5901	18.3994	2049.44
Cystic echinococcosis	1015.38	0.31697	1.58963	6.72723	15.1246	26.9813	34.4726	47.8747	50.2618	56.9908	55.8763	83.3997	56.6409	54.3901	61.3988	52.0132	53.7668	37.6087	29.4581	64.2319	226.257	0	2030.76
Other neurological disorders	982.514	0.530698	2.38267	7.75208	20.2017	33.227	38.2883	47.4582	48.3069	49.8357	47.3241	43.7118	42.8018	37.2811	33.2245	30.8576	39.7003	68.4293	101.222	68.8542	121.124	100	1965.03
Opioid use disorders	926.383	0.599436	6.74043	9.69884	20.6601	32.2038	30.8138	30.5186	29.8123	19.1799	21.5105	0	39.8407	163.221	190.754	125.046	99.805	61.5219	43.1732	0	0	1.28292	1852.77
Digestive congenital anomalies	907.135							0.432451	0.531176	0.445362	0.367533	4.23364	0.296683	0.283291	0.359859	0.52547	1.01257	1.47155	2.24276	2.96176	53.4984	838.472	1814.27
Acute myeloid leukemia	783.379	0.553447	2.92606	9.72102	20.3829	25.2376	45.9569	83.6848	55.7399	50.6295	56.7793	60.0373	35.8655	37.5953	44.986	30.4992	32.3695	46.9695	36.6192	53.9343	36.7726	16.1196	1566.76
Rheumatoid arthritis	749.542	1.71468	7.91808	24.9546	57.1623	95.8392	95.7526	99.187	81.1208	69.4274	50.5922	14.403	37.8616	25.5242	16.3466	14.152	14.0258	12.3726	13.6784	17.5088			1499.08
Myocarditis	736.666	1.70292	6.05375	17.7083	26.2769	31.2694	29.7192	29.8698	30.99	44.2656	41.0821	17.4197	43.4167	59.991	45.9501	34.9249	37.5654	29.7606	29.0556	18.5774	78.6014	82.4648	1473.33
Chronic myeloid leukemia	643.357	0.242023	0.938702	1.5594	4.31621	28.2675	49.6382	68.4879	62.2235	39.8557	52.6518		62.8428	49.0791	50.365	50.1719	59.524	23.0199	40.1736				1286.71
Foreign body in other body part	620.811	0.461003	1.60148	4.74594	9.29854	12.5434	10.7594	11.5458	13.5483	15.5794	16.2243	42.409	16.7231	46.4387	53.3421	48.7553	32.7235	33.4079	25.728	40.8735	114.269	69.8331	1241.62
Upper respiratory infections	614.301	0.210219	1.08538	3.78281	7.17693	12.0849	12.42	16.7798	17.4703	17.2682	17.0855	9.47126	17.1061	16.0216	15.9575	14.2493	15.311	15.7537	16.644	8.04156	174.444	205.937	1228.6
Iodine deficiency	589.794	0.3868	1.7556	7.95366	19.402	29.3551	35.9475	41.8735	30.3542	38.7167	44.1089	14.9531	27.6907	21.3632	27.4178	32.9113	29.0696	27.2438	20.0663	4.70227	64.8422	69.6803	1179.59
Gonococcal infection	539.755	1.6629	3.0308	4.48935	4.71325	31.9829	2.1918	4.31329	19.4557	56.3701	32.543		36.1714	17.1503	56.5939	59.1906	88.4594	53.7018	61.1337	6.60115			1079.51
Other chromosomal abnormalities	536.657							0.109967	0.110474	0.341738	0.261466	4.26231	0.227994	0.399573	0.368967	0.7341	2.09464	2.26179	3.98272	3.97672	23.3996	494.125	1073.31
Uterine fibroids	517.136	0.163404	0.720114	0.426138	1.01384	1.83309	0.179848	14.4259	0.198603	64.504	129.717		134.553	90.7968	49.64	16.7383	7.0992	4.00787	1.11903				1034.27
Interstitial lung disease and pulmonary sarcoidosis	492.249	0.754375	4.8062	18.2216	42.391	61.4513	75.1457	70.2374	52.1164	49.2933	30.3817	4.38037	20.6202	15.3936	10.9434	8.32877	5.31248	5.21483	3.42036	2.34059	11.4954		984.498
Maternal deaths aggravated by HIV/AIDS	490.464										5.31331		37.1309	75.331	103.718	111.978	94.3207	52.0327	10.4044	0.235193			980.928
Other gynecological diseases	456.893	0.373214	1.42356	0.771759	1.38667	2.75315	0.299127	14.8539	0.174593	33.5253	30.2253		77.4367	71.3715	56.9627	64.5151	41.9628	45.1199	13.7373				913.785
Mesothelioma	408.499	0.282342	1.29382	6.10837	16.8574	29.3769	52.3332	51.5977	61.8038	55.2762	38.4268		28.3097	22.5709	14.5981	10.1125	8.27304	5.69831	5.58021				816.999
Alcoholic cardiomyopathy	406.662	0.326911	1.49417	5.3662	13.9792	25.6943	32.1031	44.2831	49.0174	52.7714	47.5215		48.5209	32.205	24.2297	13.4946	7.3674	4.45252	3.83457				813.324
Cellulitis	361.55	1.34352	3.56255	7.49388	17.0679	49.7283	25.7598	34.9315	21.7761	39.3976	23.0333	1.2647	21.4652	7.22214	4.21594	11.4392	4.42057	11.1648	29.7473	3.96983	28.19	14.3557	723.1
Cysticercosis	361.099	0.0477124	0.202406	0.931449	2.86769	5.92417	9.80926	16.8754	18.4982	25.8585	27.6594	21.1856	22.9925	25.5981	26.007	30.7958	28.4361	22.3616	16.807	20.2791	37.9616	0	722.197
Chronic lymphoid leukemia	360.577	0.243278	2.14025	6.63574	14.7679	45.3285	53.8503	132.525	44.871	6.53375	25.7533		3.2707	4.34094	6.63817	2.05861	3.72353	3.83851	4.05751				721.154
Paratyphoid fever	336.813	0.00795009	0.0441246	0.19802	0.624078	1.15008	1.45361	1.89663	2.05225	2.43673	3.0252	96.5095	3.6907	4.69619	6.6114	10.5326	15.7669	22.5298	38.6622	84.7519	39.1558	1.01775	673.627
Down syndrome	324.77							0.836061	2.09204	3.65166	3.83364	5.25332	4.20289	4.17007	3.92123	4.74388	5.84891	6.04998	6.50656	4.60413	58.9845	210.071	649.539
Other neglected tropical diseases	316.566	0.252844	0.633658	1.81376	3.44471	4.92031	5.35059	5.1079	4.97341	5.27794	3.73625	14.0673	4.48064	4.76319	4.39514	4.28489	6.09983	7.99464	7.64699	7.44374	90.8784	129	633.132
Testicular cancer	314.346	0.182872	0.791452	3.92397	2.48281	5.76276	15.0687	2.04073	44.4648	3.80337	52.5216		24.281	12.5848	49.9625	17.1078	26.8758	37.094	15.3972				628.693
Other road injuries	303.758	0.211977	1.01414	3.6985	7.10184	12.7915	12.7619	15.3503	11.9336	16.8951	17.6403	14.3521	14.2663	14.8635	17.9036	18.3241	23.9142	32.9777	27.1373	17.0731	14.6837	8.86367	607.517
Other sexually transmitted diseases	295.847	0.887742	0.993012	1.43844	1.40334	8.63851	0.764152	1.31919	11.9079	32.4714	17.362		20.9054	9.10349	35.5004	29.5071	38.5883	32.7766	49.042	3.23768			591.693
Cyclist road injuries	292.373	0.00436406	0.360617	1.50407	7.3814	12.6466	14.5556	19.1133	15.7904	15.2212	17.5596	16.7699	13.756	14.0591	16.67	17.0215	21.6053	30.098	23.5948	18.5832	16.0784		584.747
Acute hepatitis A	270.893	0.0207025	0.220322	0.836883	2.34122	3.65919	3.77847	3.90711	2.81146	4.13492	1.90189	4.913	2.84102	2.02089	1.98014	2.09765	3.20047	7.17944	4.77766	4.63002	75.189	138.451	541.785
Executions and police conflict	263.552	0.0841082	0.401195	1.0247	2.06925	2.45658	2.50658	2.28785	1.6981	2.35697	1.72613	6.77988	6.69123	4.68677	13.7723	27.2045	39.5436	73.988	52.2012	12.6807	7.23102	2.16116	527.104
Other skin and subcutaneous diseases	244.995	0.546016	1.48423	3.34364	7.89961	25.6544	12.4919	16.9535	9.25317	18.363	10.1417	1.36276	10.0939	7.17919	3.5393	10.3902	4.56687	10.9666	25.9606	4.10965	36.7411	23.9533	489.989
Urogenital congenital anomalies	240.06							3.28658	2.81128	2.76901	2.00183	3.69323	1.55571	1.78961	1.43404	1.4276	2.07919	2.3732	2.42467	4.55926	10.219	197.635	480.119
Otitis media	239.285	1.08065	5.00599	9.47561	15.3863	14.9236	9.60345	7.18281	6.24034	7.42105	4.57201	17.3454	9.06393	8.55152	6.08596	5.03252	16.3149	0.425116	0.0798628	28.5284	57.2227	9.74261	478.57
Pneumoconiosis	233.853	0.60835	3.45053	10.2517	24.1096	34.8953	39.0616	34.2574	26.0105	20.827	12.5221		8.52939	6.24737	4.65378	3.32734	1.85166	1.93615	1.31369				467.707
Acute hepatitis C	227.991	0.120685	1.08897	3.74437	9.54769	16.051	19.5071	26.8672	22.6579	34.0724	13.7304	10.6219	15.4847	8.98725	6.93834	5.20529	6.54814	11.4321	7.55488	7.83071			455.982
Peripheral artery disease	204.119	2.63574	9.57815	21.7126	39.518	37.0187	31.7406	23.1255	16.6574	10.207	6.32117		2.84486	2.75914									408.238
Other drug use disorders	201.325	0.464065	5.13388	7.50577	16.0093	16.6846	17.5234	6.73434	7.17541	4.65305	5.36373	0	9.33045	27.2312	28.5031	19.8683	13.8755	9.19875	6.06996	0	0	0	402.65
Chlamydial infection	196.725	0.513148	1.02806	1.65567	1.76814	8.51352	0.589284	0.793355	7.95578	19.1268	10.39		13.0528	6.12187	20.0055	10.8717	33.3877	35.6698	22.9046	2.37719			393.45
Dietary iron deficiency	181.331	0.334631	0.500599	1.0991	3.71651	3.0581	2.32068	4.03976	3.80891	7.55344	14.4071	3.91777	12.1537	8.41804	13.6752	20.4359	20.8265	31.9328	19.8019	4.29325	4.00701	1.03007	362.662
Orofacial clefts	155.685																				3.78901	151.896	311.37
Urolithiasis	142.344	0.198151	0.895561	2.01433	4.15109	9.41788	8.01943	15.3157	10.2293	7.43039	6.56851	3.82949	6.26909	5.1928	4.49381	5.3929	5.48981	15.6047	25.3211	6.50962			284.687
Multiple sclerosis	138.165	0.023849	0.165292	0.793942	2.46727	4.77037	7.17697	10.281	12.3884	16.0816	16.8648		17.2818	17.3107	13.6562	8.83049	5.80475	4.2675					276.33
Polycystic ovarian syndrome	128.424										43.5513		22.4929	17.3531	13.4927	11.6206	13.1285	6.53318	0.251328				256.847
Congenital musculoskeletal and limb anomalies	111.569							0.100787	0.0994672	0.143618	0.15696	1.68847	0.148232	0.198465	0.233369	0.359608	0.652597	0.792153	1.65393	1.60236	7.72796	96.0108	223.138
Other pneumoconiosis	107.339	0.381561	1.90155	5.08504	11.0128	16.3301	17.5859	14.2219	12.3662	9.05372	5.44226		4.06785	3.47973	2.39373	1.67469	0.857272	0.876655	0.607803				214.678
Motor neuron disease	95.5176	0.0154683	0.0804141	0.654649	2.06296	4.26983	6.96221	10.4828	10.666	10.5612	8.69125	0.292595	7.11397	5.065	3.17279	1.62001	0.745356	0.768031	0.704371	0.627072	8.65182	12.3098	191.035
Extensively drug-resistant tuberculosis	87.5113	0.191316	0.562111	2.04233	4.19272	5.88481	6.38352	6.9802	6.47233	8.30293	7.49773	0.490538	6.08431	5.4233	5.57407	5.55066	5.20888	4.31106	2.44796	0.668613	1.79298	1.44898	175.023
Genital prolapse	86.4951	0.314873	1.58003	0.926943	1.7768	3.0701	0.385103	18.5497	0.210005	33.2424	6.60015		3.49737	3.60323	2.16111	3.26808	4.35221	2.07225	0.884771				172.99
Acute glomerulonephritis	85.072	0.080454	0.363447	1.23056	2.70564	3.59357	4.22193	3.63205	3.49675	3.33803	2.21566	8.08576	2.4696	2.21444	2.47771	2.99356	4.19344	5.14026	6.47094	10.2974	11.3327	4.51809	170.144
Cocaine use disorders	83.9713	0.0106555	0.192506	0.257078	0.62679	3.03902	3.81725	3.86048	3.85792	2.29873	3.24003	0	4.9755	14.844	20.4643	11.2827	6.13552	3.34323	1.72551	0	0	0	167.943
Silicosis	59.715	0.108506	0.714439	2.78226	6.91876	10.233	11.0134	10.2041	5.54277	5.31176	2.64311		1.87755	0.876894	0.749925	0.436184	0.151457	0.0909387	0.0599805				119.43
Amphetamine use disorders	45.503	0.00462176	0.0844901	0.117487	0.289192	1.11432	1.3207	1.73573	1.83292	1.08573	1.34757	0	2.63679	8.5026	11.9711	6.01249	3.94622	2.16966	1.33135	0	0	0	91.006
Asbestosis	39.7327	0.0683805	0.569526	1.4965	3.61546	4.87122	6.27637	5.37284	4.65092	3.59718	2.18601		1.41111	1.20725	1.10202	1.05079	0.737469	0.903074	0.616581				79.4654
Coal workers pneumoconiosis	27.0669	0.0499031	0.265017	0.887902	2.56259	3.46103	4.18584	4.45859	3.45056	2.86433	2.25067		1.17289	0.683501	0.408114	0.165682	0.105459	0.0654875	0.029327				54.1338
Dengue	24.912	0.0179902	0.109819	0.428996	0.674906	0.649703	0.697689	0.947084	0.709225	0.695018	0.472605	1.54524	0.651444	0.659212	0.47893	0.459753	0.649687	0.694933	0.731521	1.20558	6.03838	6.39426	49.824
HIV/AIDS - Extensively drug-resistant Tuberculosis	23.5916	0.00017291	0.00113764	0.00521427	0.0156702	0.0757476	0.137972	0.254123	0.403741	0.709566	1.4979	0.804792	2.3516	3.27545	3.52679	3.08504	1.93113	0.854677	1.70951	1.26863	0.576068	1.1067	47.1833
Eating disorders	7.08572									0	0	0.206119	0.879621	0.959065	0.939258	0.934918	1.0954	1.03997	0.768496	0.262879			14.1714
Anorexia nervosa	6.3816									0	0	0.14648	0.731319	0.860756	0.897353	0.861282	1.03674	0.978519	0.6754	0.193752			12.7632
Endometriosis	2.83248										0.792113		0.719051	0.380322	0.184934	0.34131	0.203146	0.164422	0.0471828				5.66496
Bulimia nervosa	0.704121									0	0	0.0596391	0.148302	0.0983088	0.0419049	0.0736358	0.0586545	0.0614513	0.0930968	0.0691272			1.40824
Chagas disease	0					0																	0
African trypanosomiasis	0	0	0	0	0	0	0	0	0	0	0	0	0	0	0	0	0	0	0	0	0	0	0
Zika virus	0	0	0	0	0	0	0	0	0	0	0	0	0	0	0	0	0	0	0	0	0	0	0
Ebola	0	0	0	0	0	0	0	0	0	0	0	0	0	0	0	0	0	0	0	0	0	0	0
Exposure to forces of nature	0	0	0	0	0	0	0	0	0	0	0	0	0	0	0	0	0	0	0	0	0	0	0
Grand Total	1.35348e+07	20267.2	86467.2	269966	577432	774108	837827	839364	726071	659504	593718	317792	534690	519687	497611	471036	445352	422013	344427	240684	1.54551e+06	2.81129e+06	2.70696e+07

## Sheet: code
cause_id	cause_name	parent_id	level	cause_outline	sort_order
294	All causes	294	0	Total	1
295	Communicable, maternal, neonatal, and nutritional diseases	294	1	A	2
296	HIV/AIDS and tuberculosis	295	2	A.1	3
297	Tuberculosis	296	3	A.1.1	4
934	Drug-susceptible tuberculosis	297	4	A.1.1.1	5
946	Multidrug-resistant tuberculosis without extensive drug resistance	297	4	A.1.1.2	6.1
947	Extensively drug-resistant tuberculosis	297	4	A.1.1.3	6.2
954	Latent tuberculosis infection	297	4	A.1.1.4	6.3
298	HIV/AIDS	296	3	A.1.2	7
948	Drug-susceptible HIV/AIDS - Tuberculosis	298	4	A.1.2.1	8.1
949	Multidrug-resistant HIV/AIDS - Tuberculosis without extensive drug resistance	298	4	A.1.2.2	8.2
950	Extensively drug-resistant HIV/AIDS - Tuberculosis	298	4	A.1.2.3	8.3
300	HIV/AIDS resulting in other diseases	298	4	A.1.2.4	9
301	Diarrhea, lower respiratory, and other common infectious diseases	295	2	A.2	10
302	Diarrheal diseases	301	3	A.2.1	11
318	Intestinal infectious diseases	301	3	A.2.2	27
319	Typhoid fever	318	4	A.2.2.1	28
320	Paratyphoid fever	318	4	A.2.2.2	29
321	Other intestinal infectious diseases	318	4	A.2.2.3	30
322	Lower respiratory infections	301	3	A.2.3	31
328	Upper respiratory infections	301	3	A.2.4	37
329	Otitis media	301	3	A.2.5	38
332	Meningitis	301	3	A.2.6	41
333	Pneumococcal meningitis	332	4	A.2.6.1	42
334	H influenzae type B meningitis	332	4	A.2.6.2	43
335	Meningococcal meningitis	332	4	A.2.6.3	44
336	Other meningitis	332	4	A.2.6.4	45
337	Encephalitis	301	3	A.2.7	46
338	Diphtheria	301	3	A.2.8	47
339	Whooping cough	301	3	A.2.9	48
340	Tetanus	301	3	A.2.10	49
341	Measles	301	3	A.2.11	50
342	Varicella and herpes zoster	301	3	A.2.12	51
344	Neglected tropical diseases and malaria	295	2	A.3	53
345	Malaria	344	3	A.3.1	54
346	Chagas disease	344	3	A.3.2	58
347	Leishmaniasis	344	3	A.3.3	59
348	Visceral leishmaniasis	347	4	A.3.3.1	60
349	Cutaneous and mucocutaneous leishmaniasis	347	4	A.3.3.2	61
350	African trypanosomiasis	344	3	A.3.4	62
351	Schistosomiasis	344	3	A.3.5	63
352	Cysticercosis	344	3	A.3.6	64
353	Cystic echinococcosis	344	3	A.3.7	65
354	Lymphatic filariasis	344	3	A.3.8	66
355	Onchocerciasis	344	3	A.3.9	67
356	Trachoma	344	3	A.3.10	68
357	Dengue	344	3	A.3.11	69
358	Yellow fever	344	3	A.3.12	70
359	Rabies	344	3	A.3.13	71
360	Intestinal nematode infections	344	3	A.3.14	72
361	Ascariasis	360	4	A.3.14.1	73
362	Trichuriasis	360	4	A.3.14.2	74
363	Hookworm disease	360	4	A.3.14.3	75
364	Food-borne trematodiases	344	3	A.3.15	76
405	Leprosy	344	3	A.3.16	77
843	Ebola	344	3	A.3.17	78
935	Zika virus	344	3	A.3.18	79
936	Guinea worm disease	344	3	A.3.19	80
365	Other neglected tropical diseases	344	3	A.3.20	82
366	Maternal disorders	295	2	A.4	83
367	Maternal hemorrhage	366	3	A.4.1	84
368	Maternal sepsis and other maternal infections	366	3	A.4.2	85
369	Maternal hypertensive disorders	366	3	A.4.3	86
370	Maternal obstructed labor and uterine rupture	366	3	A.4.4	87
371	Maternal abortion, miscarriage, and ectopic pregnancy	366	3	A.4.5	88
375	Indirect maternal deaths	366	3	A.4.6	92
376	Late maternal deaths	366	3	A.4.7	93
741	Maternal deaths aggravated by HIV/AIDS	366	3	A.4.8	94
379	Other maternal disorders	366	3	A.4.9	97
380	Neonatal disorders	295	2	A.5	98
381	Neonatal preterm birth complications	380	3	A.5.1	99
382	Neonatal encephalopathy due to birth asphyxia and trauma	380	3	A.5.2	100
383	Neonatal sepsis and other neonatal infections	380	3	A.5.3	101
384	Hemolytic disease and other neonatal jaundice	380	3	A.5.4	102
385	Other neonatal disorders	380	3	A.5.5	103
386	Nutritional deficiencies	295	2	A.6	104
387	Protein-energy malnutrition	386	3	A.6.1	105
388	Iodine deficiency	386	3	A.6.2	106
389	Vitamin A deficiency	386	3	A.6.3	107
390	Iron-deficiency anemia	386	3	A.6.4	108
391	Other nutritional deficiencies	386	3	A.6.5	109
392	Other communicable, maternal, neonatal, and nutritional diseases	295	2	A.7	110
393	Sexually transmitted diseases excluding HIV	392	3	A.7.1	111
394	Syphilis	393	4	A.7.1.1	112
395	Chlamydial infection	393	4	A.7.1.2	113
396	Gonococcal infection	393	4	A.7.1.3	114
397	Trichomoniasis	393	4	A.7.1.4	115
398	Genital herpes	393	4	A.7.1.5	116
399	Other sexually transmitted diseases	393	4	A.7.1.6	117
400	Hepatitis	392	3	A.7.2	118
401	Acute hepatitis A	400	4	A.7.2.1	119
402	Hepatitis B	400	4	A.7.2.2	120
403	Hepatitis C	400	4	A.7.2.3	121
404	Acute hepatitis E	400	4	A.7.2.4	122
408	Other infectious diseases	392	3	A.7.3	126
409	Non-communicable diseases	294	1	B	127
410	Neoplasms	409	2	B.1	128
444	Lip and oral cavity cancer	410	3	B.1.1	129
447	Nasopharynx cancer	410	3	B.1.2	132
450	Other pharynx cancer	410	3	B.1.3	135
411	Esophageal cancer	410	3	B.1.4	138
414	Stomach cancer	410	3	B.1.5	141
441	Colon and rectum cancer	410	3	B.1.6	144
417	Liver cancer	410	3	B.1.7	147
418	Liver cancer due to hepatitis B	417	4	B.1.7.1	148
419	Liver cancer due to hepatitis C	417	4	B.1.7.2	149
420	Liver cancer due to alcohol use	417	4	B.1.7.3	150
421	Liver cancer due to other causes	417	4	B.1.7.4	151
453	Gallbladder and biliary tract cancer	410	3	B.1.8	153
456	Pancreatic cancer	410	3	B.1.9	156
423	Larynx cancer	410	3	B.1.10	159
426	Tracheal, bronchus, and lung cancer	410	3	B.1.11	162
459	Malignant skin melanoma	410	3	B.1.12	165
462	Non-melanoma skin cancer	410	3	B.1.13	168
849	Non-melanoma skin cancer (squamous-cell carcinoma)	462	4	B.1.13.1	169
850	Non-melanoma skin cancer (basal-cell carcinoma)	462	4	B.1.13.2	170
429	Breast cancer	410	3	B.1.14	172
432	Cervical cancer	410	3	B.1.15	175
435	Uterine cancer	410	3	B.1.16	178
465	Ovarian cancer	410	3	B.1.17	181
438	Prostate cancer	410	3	B.1.18	184
468	Testicular cancer	410	3	B.1.19	187
471	Kidney cancer	410	3	B.1.20	190
474	Bladder cancer	410	3	B.1.21	193
477	Brain and nervous system cancer	410	3	B.1.22	196
480	Thyroid cancer	410	3	B.1.23	199
483	Mesothelioma	410	3	B.1.24	202
484	Hodgkin lymphoma	410	3	B.1.25	203
485	Non-Hodgkin lymphoma	410	3	B.1.26	204
486	Multiple myeloma	410	3	B.1.27	205
487	Leukemia	410	3	B.1.28	206
845	Acute lymphoid leukemia	487	4	B.1.28.1	208
846	Chronic lymphoid leukemia	487	4	B.1.28.2	209
847	Acute myeloid leukemia	487	4	B.1.28.3	211
848	Chronic myeloid leukemia	487	4	B.1.28.4	212
943	Other leukemia	487	4	B.1.28.5	212.5
488	Other neoplasms	410	3	B.1.29	213
491	Cardiovascular diseases	409	2	B.2	216
492	Rheumatic heart disease	491	3	B.2.1	217
493	Ischemic heart disease	491	3	B.2.2	218
494	Cerebrovascular disease	491	3	B.2.3	219
495	Ischemic stroke	494	4	B.2.3.1	220
496	Hemorrhagic stroke	494	4	B.2.3.2	221
498	Hypertensive heart disease	491	3	B.2.4	223
499	Cardiomyopathy and myocarditis	491	3	B.2.5	224
942	Myocarditis	499	4	B.2.5.1	225
938	Alcoholic cardiomyopathy	499	4	B.2.5.2	226
944	Other cardiomyopathy	499	4	B.2.5.3	226.5
500	Atrial fibrillation and flutter	491	3	B.2.6	227
501	Aortic aneurysm	491	3	B.2.7	228
502	Peripheral artery disease	491	3	B.2.8	229
503	Endocarditis	491	3	B.2.9	230
507	Other cardiovascular and circulatory diseases	491	3	B.2.10	234
508	Chronic respiratory diseases	409	2	B.3	235
509	Chronic obstructive pulmonary disease	508	3	B.3.1	236
510	Pneumoconiosis	508	3	B.3.2	237
511	Silicosis	510	4	B.3.2.1	238
512	Asbestosis	510	4	B.3.2.2	239
513	Coal workers pneumoconiosis	510	4	B.3.2.3	240
514	Other pneumoconiosis	510	4	B.3.2.4	241
515	Asthma	508	3	B.3.3	242
516	Interstitial lung disease and pulmonary sarcoidosis	508	3	B.3.4	243
520	Other chronic respiratory diseases	508	3	B.3.5	247
521	Cirrhosis and other chronic liver diseases	409	2	B.4	248
522	Cirrhosis and other chronic liver diseases due to hepatitis B	521	3	B.4.1	249
523	Cirrhosis and other chronic liver diseases due to hepatitis C	521	3	B.4.2	250
524	Cirrhosis and other chronic liver diseases due to alcohol use	521	3	B.4.3	251
525	Cirrhosis and other chronic liver diseases due to other causes	521	3	B.4.4	252
526	Digestive diseases	409	2	B.5	253
527	Peptic ulcer disease	526	3	B.5.1	254
528	Gastritis and duodenitis	526	3	B.5.2	255
529	Appendicitis	526	3	B.5.3	256
530	Paralytic ileus and intestinal obstruction	526	3	B.5.4	257
531	Inguinal, femoral, and abdominal hernia	526	3	B.5.5	258
532	Inflammatory bowel disease	526	3	B.5.6	259
533	Vascular intestinal disorders	526	3	B.5.7	260
534	Gallbladder and biliary diseases	526	3	B.5.8	261
535	Pancreatitis	526	3	B.5.9	262
541	Other digestive diseases	526	3	B.5.10	268
542	Neurological disorders	409	2	B.6	269
543	Alzheimer disease and other dementias	542	3	B.6.1	270
544	Parkinson disease	542	3	B.6.2	271
545	Epilepsy	542	3	B.6.3	272
546	Multiple sclerosis	542	3	B.6.4	273
554	Motor neuron disease	542	3	B.6.5	274
547	Migraine	542	3	B.6.6	275
548	Tension-type headache	542	3	B.6.7	276
557	Other neurological disorders	542	3	B.6.8	284
558	Mental and substance use disorders	409	2	B.7	285
559	Schizophrenia	558	3	B.7.1	286
560	Alcohol use disorders	558	3	B.7.2	287
561	Drug use disorders	558	3	B.7.3	288
562	Opioid use disorders	561	4	B.7.3.1	289
563	Cocaine use disorders	561	4	B.7.3.2	290
564	Amphetamine use disorders	561	4	B.7.3.3	291
565	Cannabis use disorders	561	4	B.7.3.4	292
566	Other drug use disorders	561	4	B.7.3.5	293
567	Depressive disorders	558	3	B.7.4	294
568	Major depressive disorder	567	4	B.7.4.1	295
569	Dysthymia	567	4	B.7.4.2	296
570	Bipolar disorder	558	3	B.7.5	297
571	Anxiety disorders	558	3	B.7.6	298
572	Eating disorders	558	3	B.7.7	299
573	Anorexia nervosa	572	4	B.7.7.1	300
574	Bulimia nervosa	572	4	B.7.7.2	301
575	Autistic spectrum disorders	558	3	B.7.8	302
576	Autism	575	4	B.7.8.1	303
577	Asperger syndrome and other autistic spectrum disorders	575	4	B.7.8.2	304
578	Attention-deficit/hyperactivity disorder	558	3	B.7.9	305
579	Conduct disorder	558	3	B.7.10	306
582	Idiopathic developmental intellectual disability	558	3	B.7.11	309
585	Other mental and substance use disorders	558	3	B.7.12	312
586	Diabetes, urogenital, blood, and endocrine diseases	409	2	B.8	313
587	Diabetes mellitus	586	3	B.8.1	314
588	Acute glomerulonephritis	586	3	B.8.2	315
589	Chronic kidney disease	586	3	B.8.3	316
590	Chronic kidney disease due to diabetes mellitus	589	4	B.8.3.1	317
591	Chronic kidney disease due to hypertension	589	4	B.8.3.2	318
592	Chronic kidney disease due to glomerulonephritis	589	4	B.8.3.3	319
593	Chronic kidney disease due to other causes	589	4	B.8.3.4	320
594	Urinary diseases and male infertility	586	3	B.8.4	321
595	Interstitial nephritis and urinary tract infections	594	4	B.8.4.1	322
596	Urolithiasis	594	4	B.8.4.2	323
597	Benign prostatic hyperplasia	594	4	B.8.4.3	324
598	Male infertility	594	4	B.8.4.4	325
602	Other urinary diseases	594	4	B.8.4.5	329
603	Gynecological diseases	586	3	B.8.5	330
604	Uterine fibroids	603	4	B.8.5.1	331
605	Polycystic ovarian syndrome	603	4	B.8.5.2	332
606	Female infertility	603	4	B.8.5.3	333
607	Endometriosis	603	4	B.8.5.4	334
608	Genital prolapse	603	4	B.8.5.5	335
609	Premenstrual syndrome	603	4	B.8.5.6	336
612	Other gynecological diseases	603	4	B.8.5.7	340
613	Hemoglobinopathies and hemolytic anemias	586	3	B.8.6	341
614	Thalassemias	613	4	B.8.6.1	342
837	Thalassemias trait	613	4	B.8.6.2	343
615	Sickle cell disorders	613	4	B.8.6.3	344
838	Sickle cell trait	613	4	B.8.6.4	345
616	G6PD deficiency	613	4	B.8.6.5	346
839	G6PD trait	613	4	B.8.6.6	347
618	Other hemoglobinopathies and hemolytic anemias	613	4	B.8.6.7	349
619	Endocrine, metabolic, blood, and immune disorders	586	3	B.8.7	350
626	Musculoskeletal disorders	409	2	B.9	358
627	Rheumatoid arthritis	626	3	B.9.1	359
628	Osteoarthritis	626	3	B.9.2	360
629	Low back and neck pain	626	3	B.9.3	361
630	Low back pain	629	4	B.9.3.1	362
631	Neck pain	629	4	B.9.3.2	363
632	Gout	626	3	B.9.4	364
639	Other musculoskeletal disorders	626	3	B.9.5	371
640	Other non-communicable diseases	409	2	B.10	372
641	Congenital birth defects	640	3	B.10.1	373
642	Neural tube defects	641	4	B.10.1.1	374
643	Congenital heart anomalies	641	4	B.10.1.2	375
644	Orofacial clefts	641	4	B.10.1.3	376
645	Down syndrome	641	4	B.10.1.4	377
646	Turner syndrome	641	4	B.10.1.5	378
647	Klinefelter syndrome	641	4	B.10.1.6	379
648	Other chromosomal abnormalities	641	4	B.10.1.7	380
649	Congenital musculoskeletal and limb anomalies	641	4	B.10.1.8	381
650	Urogenital congenital anomalies	641	4	B.10.1.9	382
651	Digestive congenital anomalies	641	4	B.10.1.10	383
652	Other congenital birth defects	641	4	B.10.1.11	384
653	Skin and subcutaneous diseases	640	3	B.10.2	385
654	Dermatitis	653	4	B.10.2.1	386
655	Psoriasis	653	4	B.10.2.2	387
656	Cellulitis	653	4	B.10.2.3	388
657	Pyoderma	653	4	B.10.2.4	389
658	Scabies	653	4	B.10.2.5	390
659	Fungal skin diseases	653	4	B.10.2.6	391
660	Viral skin diseases	653	4	B.10.2.7	392
661	Acne vulgaris	653	4	B.10.2.8	393
662	Alopecia areata	653	4	B.10.2.9	394
663	Pruritus	653	4	B.10.2.10	395
664	Urticaria	653	4	B.10.2.11	396
665	Decubitus ulcer	653	4	B.10.2.12	397
668	Other skin and subcutaneous diseases	653	4	B.10.2.13	400
669	Sense organ diseases	640	3	B.10.3	401
670	Glaucoma	669	4	B.10.3.1	402
671	Cataract	669	4	B.10.3.2	403
672	Macular degeneration	669	4	B.10.3.3	404
673	Refraction and accommodation disorders	669	4	B.10.3.4	405
674	Age-related and other hearing loss	669	4	B.10.3.5	406
675	Other vision loss	669	4	B.10.3.6	407
679	Other sense organ diseases	669	4	B.10.3.7	411
680	Oral disorders	640	3	B.10.4	412
681	Caries of deciduous teeth	680	4	B.10.4.1	413
682	Caries of permanent teeth	680	4	B.10.4.2	414
683	Periodontal diseases	680	4	B.10.4.3	415
684	Edentulism and severe tooth loss	680	4	B.10.4.4	416
685	Other oral disorders	680	4	B.10.4.5	417
686	Sudden infant death syndrome	640	3	B.10.5	418
687	Injuries	294	1	C	419
688	Transport injuries	687	2	C.1	420
689	Road injuries	688	3	C.1.1	421
690	Pedestrian road injuries	689	4	C.1.1.1	422
691	Cyclist road injuries	689	4	C.1.1.2	423
692	Motorcyclist road injuries	689	4	C.1.1.3	424
693	Motor vehicle road injuries	689	4	C.1.1.4	425
694	Other road injuries	689	4	C.1.1.5	426
695	Other transport injuries	688	3	C.1.2	427
696	Unintentional injuries	687	2	C.2	428
697	Falls	696	3	C.2.1	429
698	Drowning	696	3	C.2.2	430
699	Fire, heat, and hot substances	696	3	C.2.3	431
700	Poisonings	696	3	C.2.4	432
704	Exposure to mechanical forces	696	3	C.2.5	436
705	Unintentional firearm injuries	704	4	C.2.5.1	437
706	Unintentional suffocation	704	4	C.2.5.2	438
707	Other exposure to mechanical forces	704	4	C.2.5.3	439
708	Adverse effects of medical treatment	696	3	C.2.6	440
709	Animal contact	696	3	C.2.7	441
710	Venomous animal contact	709	4	C.2.7.1	442
711	Non-venomous animal contact	709	4	C.2.7.2	443
712	Foreign body	696	3	C.2.8	444
713	Pulmonary aspiration and foreign body in airway	712	4	C.2.8.1	445
714	Foreign body in eyes	712	4	C.2.8.2	446
715	Foreign body in other body part	712	4	C.2.8.3	447
842	Environmental heat and cold exposure	696	3	C.2.9	448
716	Other unintentional injuries	696	3	C.2.10	450
717	Self-harm and interpersonal violence	687	2	C.3	451
718	Self-harm	717	3	C.3.1	452
721	Self-harm by firearm	718	4	C.3.1.1	455
723	Self-harm by other specified means	718	4	C.3.1.2	457
724	Interpersonal violence	717	3	C.3.2	458
725	Physical violence by firearm	724	4	C.3.2.1	459
726	Physical violence by sharp object	724	4	C.3.2.2	460
941	Sexual violence	724	4	C.3.2.3	461
727	Physical violence by other means	724	4	C.3.2.4	462
728	Forces of nature, conflict and terrorism, and executions and police conflict	687	2	C.4	463
729	Exposure to forces of nature	728	3	C.4.1	464
945	Conflict and terrorism	728	3	C.4.3	466
854	Executions and police conflict	728	3	C.4.2	467

## Sheet: survival
	LRTI
	Diarrhea
	neglected
	cvds
	TB
	nutrition
	meningitis
	chr.resp
	neoplasm
	diges.disord
	diabetes
	maternal
	transport
	HIV
	STI
	violence
	fire
	neonatal
	congenital
	Others
Ethio	pia 1990
0	3926108	284738	50219	27502	9705	344	2201	7681	12615	5832	167	0	1204	0	558	269	7848	270	970	73622	10139	73593
1	5200884	179109	27198	18158	19004	490	4417	11253	10244	3212	284	1254	2189	0	2895	955	600	318	2969	162	801	72707
5	7221346	18173	1223	2614	2256	83	381	735	539	202	174	132	288	0	1074	34	131	83	278	0	164	7781
10	5893349	13808	1019	1584	1657	133	405	602	404	189	173	137	239	0	984	5	14	173	168	0	125	5798
15	4910704	18598	1201	1867	2022	319	846	623	531	518	262	257	312	1089	1235	128	23	673	196	0	67	6428
20	3942686	24467	1587	2331	2272	468	1834	835	525	666	356	426	405	2538	1496	458	31	967	280	0	62	6932
25	3237532	24850	1783	2414	1977	534	2488	828	427	673	443	537	427	3406	985	643	34	580	253	0	71	6347
30	2741992	23692	2009	2433	1780	738	2711	929	386	718	696	687	457	2242	688	670	39	401	286	0	27	5798
35	2336552	27816	2511	2789	1774	1266	3148	1155	416	984	1147	999	592	2936	572	666	42	314	247	0	24	6233
40	2086809	27359	2193	2439	1830	1873	2692	989	370	1029	1591	1213	615	2865	604	477	36	304	215	0	18	6004
45	1704253	28164	2384	2367	1592	2816	2656	1109	376	1432	2288	1388	729	1319	708	411	34	242	235	0	16	6063
50	1354096	30929	3149	2468	1654	3369	3311	1209	505	1302	3254	1776	990	0	778	284	29	208	266	0	16	6361
55	1141638	32136	3683	2375	1489	3964	3025	1230	492	1534	3569	2026	1160	0	749	164	22	178	238	0	15	6223
60	831420	37457	5109	3052	1353	5330	3065	1492	517	2173	4123	2580	1669	0	780	58	26	174	276	0	14	5665
65	656587	37210	5996	2815	1153	5928	2595	1580	469	2427	3487	2709	1841	0	779	13	18	195	292	0	14	4898
70	437914	34719	6881	2550	1045	5913	1963	1654	381	2482	2992	2355	1725	0	663	1	16	108	333	0	13	3644
75	267105	26123	6468	1831	678	4543	1205	1428	243	1872	1578	1784	1295	0	430	0	11	64	278	0	10	2406
80	151780	23444	7920	1578	625	3705	598	1549	103	1353	1026	1331	1000	0	330	0	7	20	259	0	11	2029
	Summary of Top 15 causes of death in Ethiopia 2000, revised category (Note: Age group under one)
	population	all	LRTI	Diarrhea	neglected	cvds	TB	nutrition	meningitis	chr.resp	neoplasm	diges.disord	diabetes	maternal	transport	HIV	STI	violence	fire	neonatal	congenital	Others
0	5313328	206882	37519	23596	4149	548	1547	6661	6243	0	69	623	1240		362	4356	6541	207	358	74428	3202	35234
1	7096563	127423	18373	16850	6467	465	2396	12946	4650	549	364	624	1107		877	2809	1693	293	828	374	375	55383
5	10053437	24247	1469	2169	1388	213	513	910	1076	127	487	258	199		718	1088	549	111	225		51	12694
10	8465789	16028	1009	1192	956	320	636	384	980	115	500	328	245	80	695	387	12	193	140		44	7812
15	7228823	22698	720	1645	812	769	1958	246	1020	146	658	371	397	1464	1132	370	63	769	94		36	10027
20	5689034	30590	839	1735	808	812	3406	290	814	187	662	483	573	3002	1263	2908	52	1122	119		28	11488
25	4681838	33980	854	1566	554	844	4082	283	681	185	791	640	498	3575	971	8824	58	923	100		24	8527
30	3761574	34206	830	1516	511	1237	4390	275	638	228	1246	658	510	3600	730	10774	58	677	92		14	6223
35	2995554	33378	960	1562	605	1745	4659	270	591	282	1776	731	615	3411	671	9704	40	564	102		10	5082
40	2581061	34007	1197	1773	560	3001	4788	386	460	396	2684	961	763	2790	589	8460	18	432	108		10	4629
45	2130001	34157	1438	1944	536	4338	5430	393	536	525	3299	1049	950	1817	561	6357	28	321	127		5	4502
50	1861629	38232	1826	2355	534	6300	7222	621	653	843	4631	1338	1360	292	732	4323	41	343	185		5	4628
55	1488562	40520	2159	2810	519	8265	7517	695	648	1344	4810	1515	1725		707	2661	73	263	174		5	4630
60	1131694	42940	2837	3703	656	10581	5793	736	614	1460	5391	1518	2196		604	1758	15	182	190		4	4703
65	904799	49864	3320	4352	789	13956	6147	792	678	2022	5729	1900	2575		712	1301	2	172	257		3	5155
70	547710	45402	3457	3939	528	14473	5014	927	607	2061	4607	1734	2278		552	707	1	104	223			4189
75	354642	42503	3830	4278	441	14549	4409	942	232	1847	2454	1784	2067		464	407	19	75	220			4483
80	251293	49722	4387	5094	449	15958	4656	1425	655	2117	3591	2119	2329	0	353	115	12	29	225	0	0	6208
Ethio	pia 2010
0	5636116	152403	24284	13715	6207	185	953	4684	6826	2264	197	0	765	0	355	457	5056	278	747	57212	4053	24164
1	8203530	64272	9199	6916	11766	167	1415	5273	4274	1016	262	478	968	0	1565	1825	407	293	1829	169	319	16131
5	13008612	13437	916	1212	2136	59	282	719	532	146	298	108	292	0	1423	1233	105	170	348	0	169	3288
10	11846781	10989	700	689	1553	94	304	533	431	122	277	113	256	0	1205	1782	9	288	201	0	136	2297
15	9832403	18999	1201	1048	2582	304	915	734	815	460	486	300	465	773	2078	694	22	1259	296	0	101	4464
20	7737096	24881	1543	1344	2939	448	1936	949	760	570	636	490	606	2041	2570	540	27	1994	439	0	106	4944
25	6541224	24879	1673	1426	2417	514	2511	855	619	596	752	598	612	2178	1713	2180	28	1262	367	0	119	4457
30	5166165	24237	1711	1289	2024	679	2591	855	535	582	1050	728	616	1829	1176	3501	28	787	369	0	39	3849
35	4362104	28065	2157	1438	2001	1219	3107	1072	560	765	1673	1071	825	2061	895	4103	31	565	298	0	35	4189
40	3438140	27121	2082	1385	2100	1925	2847	1094	522	846	2472	1301	904	746	959	2833	29	529	291	0	29	4228
45	2712967	28387	2295	1263	1712	2866	2774	1229	509	1183	3271	1495	1056	841	1075	1666	26	421	300	0	24	4382
50	2298677	31191	2955	1263	1734	3773	3296	1322	655	1056	4395	1896	1401	0	1136	670	23	362	316	0	24	4913
55	1851633	34678	3699	1245	1543	5153	3161	1459	656	1438	5113	2216	1717	0	1134	283	18	346	299	0	23	5175
60	1580897	43437	5429	1678	1457	7705	3366	2004	679	2320	6114	2937	2503	0	1262	123	22	275	340	0	23	5198
65	1181041	47049	7068	1634	1317	9312	3087	2223	641	2872	5609	3208	2900	0	1314	47	18	325	359	0	23	5092
70	798247	47316	8713	1519	1257	9973	2432	2571	521	3188	5032	2998	2838	0	1233	12	17	184	372	0	23	4433
75	521354	39970	9128	1259	838	8690	1695	2352	376	2725	2926	2497	2373	0	873	0	12	133	362	0	20	3709
80	378294	45683	14764	1443	1039	8897	1027	3524	203	2510	2265	2378	2294	0	896	0	10	46	409	0	30	3946
	Summary of Top 15 causes of death in Ethiopia 2015, revised category (Note: Age group under one)
	population	all	LRTI	Diarrhea	neglected	cvds	TB	nutrition	meningitis	chr.resp	neoplasm	diges.disord	diabetes	maternal	transport	HIV	STI	violence	fire	neonatal	congenital	Others
0	6193052	112416	16106	9927	388	298	654	4177	3548	0	88	370	867		211	388	5153	188	228	55634	2144	12046
1	8708018	38672	5676	6434	731	178	689	6408	2001	226	500	295	567		367	146	1573	214	402	245	207	11813
5	13660925	11246	1068	1834	375	138	221	577	860	86	701	185	154		495	742	508	113	150		46	2993
10	12995925	10944	924	1121	298	268	338	281	913	96	772	292	225	46	623	1636	9	231	112		49	2710
15	11776318	17832	743	1631	293	800	1367	211	1096	148	1030	386	453	1000	1292	2896	47	1091	85		47	3215
20	9706753	19851	943	1851	307	899	2511	281	972	204	1075	548	732	1873	1595	1058	42	1643	120		39	3157
25	7692689	19848	952	1620	215	926	3045	259	761	194	1195	710	598	2079	1185	1577	47	1325	95		33	3034
30	6503071	21987	958	1629	212	1400	3366	261	763	254	1918	764	655	2340	931	2520	52	1021	92		19	2832
35	5080253	23757	1084	1664	243	1931	3359	251	693	307	2594	835	781	1979	837	3159	34	840	103		14	3047
40	4204143	26146	1301	1785	216	3158	3269	344	518	418	3637	1066	919	1659	724	3000	15	634	104		14	3365
45	3329541	27965	1529	1872	224	4598	3624	350	592	548	4388	1130	1145	981	669	2120	24	456	120		7	3587
50	2601664	31022	1744	2023	194	6122	4188	500	630	789	5476	1258	1486	197	780	1335	33	463	158		6	3639
55	2199125	36484	2160	2552	206	8609	4664	598	661	1348	6176	1518	2020		792	575	72	372	155		6	3999
60	1745577	42418	2946	3439	237	11791	3475	657	643	1539	7285	1547	2740		718	300	15	271	178		5	4633
65	1415924	51805	3511	4148	307	15851	3859	725	754	2206	8099	2062	3310		885	169	2	279	249		4	5384
70	986784	55571	4165	4267	213	18801	3658	991	732	2628	7713	2161	3396		794	95	1	198	250			5509
75	595163	51404	4558	4498	187	18470	3341	1012	289	2315	4133	2182	3140		670	50	17	143	246			6154
80	478108	75976	6186	6352	198	26790	4246	1967	1010	3275	6811	3177	4330	0	598	17	14	59	307	0	0	10639
